# Supplementary material for: Trends in the receipt of medicines information among Finnish adults in 1999–2014: a nationwide repeated cross-sectional survey
Source: PubMed Central journal article supplement — BMJ Open. 2019 Jun 14;9(6):e026377. doi: 10.1136/bmjopen-2018-026377 (PMC6588993; doi:10.1136/bmjopen-2018-026377), 2019-06-14
Supplement: bmjopen-2018-026377.draft_revisions.pdf [file bmjopen-2018-026377.draft_revisions.pdf]

# BMJ Open

BMJ Open is committed to open peer review. As part of this commitment we make the peer review history of every article we publish publicly available.

When an article is published we post the peer reviewers' comments and the authors' responses online. We also post the versions of the paper that were used during peer review. These are the versions that the peer review comments apply to.

The versions of the paper that follow are the versions that were submitted during the peer review process. They are not the versions of record or the final published versions. They should not be cited or distributed as the published version of this manuscript.

BMJ Open is an open access journal and the full, final, typeset and author-corrected version of record of the manuscript is available on our site with no access controls, subscription charges or pay-per-view fees (<http://bmjopen.bmj.com>).

If you have any questions on BMJ Open's open peer review process please email [info.bmjopen@bmj.com](mailto:info.bmjopen@bmj.com)

# BMJ Open

## Trends in the receipt of medicines information among Finnish adults in 1999–2014: a nationwide repeated cross-sectional survey

|                               |                                                                                                                                                                                                                                                                                                                                                                                                                                                                                      |
|-------------------------------|--------------------------------------------------------------------------------------------------------------------------------------------------------------------------------------------------------------------------------------------------------------------------------------------------------------------------------------------------------------------------------------------------------------------------------------------------------------------------------------|
| Journal:                      | <i>BMJ Open</i>                                                                                                                                                                                                                                                                                                                                                                                                                                                                      |
| Manuscript ID                 | bmjopen-2018-026377                                                                                                                                                                                                                                                                                                                                                                                                                                                                  |
| Article Type:                 | Research                                                                                                                                                                                                                                                                                                                                                                                                                                                                             |
| Date Submitted by the Author: | 29-Aug-2018                                                                                                                                                                                                                                                                                                                                                                                                                                                                          |
| Complete List of Authors:     | Mononen, Niina; University of Helsinki, Faculty of Pharmacy, Division of Pharmacology and Pharmacotherapy<br>Airaksinen, Marja; University of Helsinki, Division of Pharmacology and Pharmacotherapy<br>Hämeen-Anttila, Katri; Finnish Medicines Agency FIMEA, Assessment of Pharmacotherapies<br>Helakorpi, Satu; Terveystieteiden ja hyvinvoinnin laitos<br>Pohjanoksa-Mäntylä, Marika ; University of Helsinki, Faculty of Pharmacy, Division of Pharmacology and Pharmacotherapy |
| Keywords:                     | Medicines information, Medicines information sources, Population study, Repeated cross-sectional survey, Finland                                                                                                                                                                                                                                                                                                                                                                     |
|                               |                                                                                                                                                                                                                                                                                                                                                                                                                                                                                      |

SCHOLARONE™  
Manuscripts

Peer Review Only

|                                             |                                                                                                                                                                                                                                                                                                                                                                                                                                                                                                                                                                                                                              |
|---------------------------------------------|------------------------------------------------------------------------------------------------------------------------------------------------------------------------------------------------------------------------------------------------------------------------------------------------------------------------------------------------------------------------------------------------------------------------------------------------------------------------------------------------------------------------------------------------------------------------------------------------------------------------------|
| <b>Title</b>                                | <b>Trends in the receipt of medicines information among Finnish adults in 1999–2014: a nationwide repeated cross-sectional survey</b>                                                                                                                                                                                                                                                                                                                                                                                                                                                                                        |
| <b>Authors' names</b>                       | Niina Mononen, Marja Airaksinen, Katri Hämeen-Anttila, Satu Helakorpi, Marika Pohjanoksa-Mäntylä                                                                                                                                                                                                                                                                                                                                                                                                                                                                                                                             |
| <b>Address and position for each author</b> | <p>Niina Mononen, MSc (Pharm), PhD Student<br/> Marja Airaksinen, Professor, PhD<br/> Marika Pohjanoksa-Mäntylä, PhD, University Lecturer</p> <p>Clinical Pharmacy Group, Division of Pharmacology and Pharmacotherapy, Faculty of Pharmacy, University of Helsinki, 00014 University of Helsinki, Finland</p> <p>Katri Hämeen-Anttila, PhD, Research and Development Manager<br/> Assessment of Pharmacotherapies, Finnish Medicines Agency Fimea, P.O. Box 55, 00034 FIMEA, Finland</p> <p>Satu Helakorpi, PhD, Senior Researcher<br/> National Institute for Health and Welfare, P.O. Box 30, 00271 Helsinki, Finland</p> |
| <b>Corresponding author</b>                 | Niina Mononen<br>Clinical Pharmacy Group, Division of Pharmacology and Pharmacotherapy, Faculty of Pharmacy, University of Helsinki, 00014 University of Helsinki, Finland<br>E-mail: <a href="mailto:niina.mononen@helsinki.fi">niina.mononen@helsinki.fi</a><br>Telephone: +358 2941 59917                                                                                                                                                                                                                                                                                                                                 |

**Word count:** 3751

**Keywords:** Medicines information, Medicines information sources, Population study, Repeated cross-sectional survey, Finland

## ABSTRACT

### Objective

The aim of this study is to examine long-term trends in the receipt of medicines information (MI) among adult medicine users from 1999 to 2014.

### Design

Annually repeated cross-sectional postal survey from years 1999, 2002, 2005 and 2008-2014.

### Setting

Survey was sent to a nationally representative sample of the Finnish population aged 15-64 years drawn from the population register.

### Participants

In total, 29465 men and women of whom 18862 (64%) reported using medicines, the range of annual respondents 2545-3371 and response rates 51-67%.

### Outcome measures

Receipt of information on medicines in use within 12 months prior to the survey from a given list of consumer MI sources available in Finland.

### Results

Physicians, community pharmacists and package leaflets were the most common MI sources throughout the study period of 1999-2014. Receipt of MI increased most from the Internet (from 1% in 1999 to 16% in 2014), while decreased most from physicians (62% to 47%) and package leaflets (44% to 34%), and remained stable from community pharmacists (46% to 45%) and nurses (14% to 14%). In 1999, of the medicine users 4% did not report receipt of MI from any of the sources listed in the survey, while this proportion had remarkably increased to 28% in 2014.

### Conclusions

In this longitudinal analysis of adult medicine users' receipt of MI about the medicines they use, healthcare professionals and package leaflets had still a dominating importance in 2014 despite the growing number of novel and innovative MI sources available. Internet is still quite a rare source of MI when considering the entire adult population. Factors contributing to a growing number of adult medicine users not receiving MI from any sources should be better understood and focused in future research.

**Strengths and limitations of this study**

- The key strength of this study is that it examines trends in the receipt of medicines information among adult population during ten years period between 1999 and 2014, covering all medicine user groups.
- The annual response rates were reasonably high, and the repeated nationally representative population surveys allow for examination of trends over time at the population level and make the results generalizable to the Finnish adult population.
- Due to the cross-sectional method without cohorts, it is not possible to follow up changes in the receipt of medicines information over time at the individual level.
- The data did not provide any information about the quality, validity or amount of the medicines information received.
- Factors contributing to a growing number of adult medicine users not receiving medicines information from any sources should be better understood and focused in future research.

review only

## INTRODUCTION

Consumer access to health and medicines information (MI) has dramatically improved during the last decades.<sup>1-7</sup> Driving forces for more open access to MI have been drug safety issues, patients' right to know about medicinal interventions that they are exposed to and tendency to empower people in taking more responsibility for self-management of their diseases.<sup>2,4,7</sup> These changes have been facilitated by improved availability of balanced MI, first on paper and after the breakthrough of the Internet via websites and databases, then via electronic devices such as smartphones. The electronic applications are evolving fast towards digitalized systems for growingly customized MI, interactive communications and follow up treatments.<sup>1,3,4,8-10</sup> Improved communications on medications have also been a strategic priority of healthcare providers taken into account in national and international medicines policies, e.g. within the European Union.<sup>2,4,11-16</sup>

Consumers' health information seeking, including MI seeking from various information sources and factors influencing it have been widely researched.<sup>17-20</sup> Previous research on the receipt of MI among the adult population have either focused on 1) particular patient groups such as asthmatics,<sup>21</sup> people with cancer,<sup>22</sup> cardiovascular diseases,<sup>23</sup> HIV/AIDS,<sup>24</sup> mental disorders<sup>25</sup> or vasculitis,<sup>26</sup> 2) pregnant women,<sup>27,28</sup> or 3) focused on certain medicine user groups such as users of hormone replacement therapies,<sup>29-31</sup> analgesics,<sup>32,33</sup> antidepressants,<sup>34</sup> antihypertensives,<sup>35</sup> cardiovascular medicines<sup>36</sup> or psychotropics.<sup>37</sup> Studies involving heterogenous medicine user groups have mostly applied single cross-sectional study designs.<sup>38-46</sup> We found only one study that compared results from two years, covering a 7-year period.<sup>47</sup> The consistent findings from the previous studies are that physicians, community pharmacists and package leaflets are the most common sources of MI regardless of the research method, the study year, the research population or the country where the research was conducted.<sup>21-47</sup> It is known that consumers usually sought MI from one or two information sources.<sup>28,34,39,43,44</sup> The use of the Internet as a source of MI has become more common over time, but it is not yet as common as healthcare professionals for seeking MI among most patients and medicine users.<sup>22,24-26,30,31,33-35,38-40,42,44-46</sup> However, there is a lack of long-term population-based studies describing trends in the receipt of MI among adult medicine users. The aim of this study was to examine long-term trends in the receipt of MI among Finnish adult medicine users in 1999-2014.

## METHODS

### Context

Similarly to many developed countries, availability of and access to consumer MI has dramatically improved in Finland during the last decades.<sup>2,4,7</sup> Until 1983, people received information about medicines they used solely from physicians.<sup>7,48</sup> The remarkable landmarks towards more open access to MI have been pharmacists' duty counsel on prescription and non-prescription medicines in 1983, followed soon after in 1986 by the launch of the first computerized database system to produce leaflets for consumers in community pharmacies. Package leaflets became mandatory in Finland as in other European Union countries in 1999.<sup>49</sup> About the same time, the Internet and mobile phones started to become more common and eventually revolutionized access to health and MI. "From paper the cyber" shift has improved access to statutory MI, e.g. by making package leaflets available online in written and audio format,<sup>50,51</sup> but most powerful has been the diversification of MI sources and empowering people to access MI by themselves. A wide range of stakeholders from the drug industry to non-profit professional and patient organisations have been involved in developing new databases and modes for communicating on medicines to consumers. To coordinate MI practices and enhance public-private partnerships, the European Union has recommended its member states to establish national MI programs and strategies.<sup>13</sup> Such a strategy was established for the first time in Finland in 2012 by the Finnish Medicines Agency.<sup>2</sup> The ultimate goal of the Finnish MI strategy is to improve adherence to long-term therapies by enhanced MI by 2020.

### Study design

The study was conducted as an annually repeated cross-sectional postal survey using a national representative sample of the Finnish adult population aged 15-64 years. The data were derived from the national postal survey "Health Behaviour and Health among the Finnish Adult Population" which has been conducted annually from 1978 to 2014 by the National Institute for Health and Welfare (formerly the National Public Health Institute).<sup>52</sup> The primary objective of the survey has been to obtain evidence on the health behaviour of the working-age population and on its short- and long-term changes.

Annually, a random representative sample of 5000 Finnish citizens, aged 15-64 years and residing permanently in Finland was derived from the National Population Register Centre. The sample was made nationally representative of the non-institutionalized adult population.<sup>52</sup> A postal survey was mailed each year in the spring followed by three reminders to non-respondents within the following two months. The current study focuses on a question related to receipt of MI from various sources

1  
2  
3 available at the point of the survey. Data from the years 1999, 2002, 2005, 2008-2014 was compared  
4 as these are the years when the survey instrument included the question on the receipt of MI.  
5  
6

### 7 **Survey instrument and measures**

8  
9

10 The main outcome measure was the receipt of MI on medicines in use. The structured survey  
11 instrument contained the following question “In the past year (12 months), from which sources did  
12 you receive information on the medicines you have been using?” The question was followed by a list  
13 of MI sources available for consumers in Finland at the time of the study (Fig. 1). Respondents could  
14 indicate from the list as many information sources as applicable. It was not possible to report other  
15 sources than those mentioned in the survey. In 2002, package leaflets and telephone services (call  
16 centre) were added to the list of MI sources.  
17  
18  
19  
20  
21

22 Socio-demographic variables used in this study were gender and age the year of birth. Health-related  
23 variables used were respondents’ medicine use and diagnosed diseases. Use of medicines was  
24 assessed by the question “Have you used any tablets, powders, or other medicines within the past  
25 week (7 days)?” This question was followed by a list of commonly used prescription and non-  
26 prescription medicines for common chronic and acute conditions (Table 1). Respondents could  
27 indicate from the list as many medicines as they had been using within 7 days’ time frame prior to the  
28 survey. It was not possible to report any other medicines other than those mentioned in the list.  
29 Diagnosed diseases were asked about with a question “Within the past year (12 months), have you  
30 had any of the following diagnosed diseases or diseases treated by the physicians?” This question was  
31 followed by a list of chronic and acute diseases common in Finland (Table 1). Respondents could  
32 indicate from the list as many diseases as they had been suffering from within the year prior to the  
33 survey. It was not possible to report any other diseases than those mentioned in the list.  
34  
35  
36  
37  
38  
39  
40

### 41 **Analysis**

42  
43  
44

45 Descriptive statistics were conducted using the Statistical Package for Social Sciences software (IBM  
46 SPSS Statistics for Windows, Released 2016, Version 24.0. Armonk, NY: IBM Corp.). Only  
47 respondents who reported using at least one prescription or non-prescription medicine during the  
48 given 7 days’ time frame prior to the survey were included in the analysis as medicine users.  
49  
50  
51

52 Trends in the receipt of MI from different information sources and the number of MI sources used by  
53 the respondent were counted for each study year 1999-2014 (Fig. 1 and 2). The number of MI sources  
54 from which the respondents had received information on the medicines they used was divided into  
55 seven groups: no sources, one, two, three, four, five and six or more sources.  
56  
57  
58  
59  
60



1  
2  
3  
4 The receipt of MI from different information sources was plotted against gender, age, number of  
5 medicines in use and number of diagnosed diseases for each study year 1999-2014 (Appendix A, B).  
6 Age calculation was based on the year of birth, and the respondents were divided into five age groups  
7 (Table 1).  
8  
9

10  
11 The number of medicines in use was counted for each respondent and respondents were divided into  
12 four groups accordingly: people with one, two, three, and four or more medicines in use (Table 1).  
13 The receipt of MI was compared between all these four medicine user groups (Appendix B). Also, the  
14 number of diagnosed diseases was counted for each respondent and respondents were divided into  
15 four groups: no diseases, one, two, three or more diseases (Table 1). The receipt of MI was compared  
16 between all these groups (Appendix B).  
17  
18  
19

20  
21 Finally, a ratio between the mean number of medicines in use and the mean number of diagnosed  
22 diseases compared to the mean number of MI sources from which MI was received was calculated to  
23 indicate whether any remarkable changes were seen over time in the number of MI sources used in  
24 relation to morbidity and medicine use.  
25  
26  
27

### 28 29 **Patient and public involvement**

30  
31 Patient perspective was taken into account in designing the research question, method and developing  
32 the survey instrument by reviewing previous international and national research on receipt of MI in  
33 different populations and patient groups.<sup>6,53-55</sup> The survey instrument on MI sources was piloted by a  
34 convenience sample of the target group. The results of the study have not been sent to the study  
35 participants for comments, but the annual reports of the Health Behaviour and Health among the  
36 Finnish Adult Population Survey are available on the website of the Finnish National Institute for  
37 Health and Welfare.<sup>52</sup>  
38  
39  
40  
41  
42  
43

### 44 **Research ethics**

45  
46 As this study was a secondary analysis using routinely collected and fully anonymized data, ethics  
47 approval was not applicable, because anonymous surveys are exempt from ethical approval in  
48 Finland.<sup>56</sup> Responding to the survey was voluntary and considered as giving an informed consent. All  
49 study procedures were conducted according to good scientific practice.  
50  
51  
52  
53  
54  
55  
56  
57  
58  
59  
60

## RESULTS

A total of 29465 responses were included in this study, of which 18862 (64%) reported use of medicines (Table 1). The number of respondents varied annually from 2545 to 3371 (response rate 51% to 67%) during the study period 1999-2014 (Table 1). The gender distribution of the respondents who reported using medicines (n=18862) remained similar throughout the study period with almost two thirds of the respondents being female (61% to 64%). Age groups of 45-54 and 55-64 years were the largest, and the annual mean age varied between 41 and 45 years. Most of the respondents had more than primary school education (>9 years, 73% to 88%), and the majority were at work (79% to 83%). The respondents used most commonly one medicine (54% to 63%, including prescription and non-prescription medicines), reported using medicines most commonly for headaches (50% to 53%) and other aches or pains (28% to 31%). More than a quarter of the medicine users reported having at least one diagnosed disease of the diseases listed in the survey (26% to 29%). The most common diseases reported were high blood pressure or hypertension (18% to 25%), high blood cholesterol (13% to 21%), hay or allergic rhinitis (15% to 18%), and degenerative disk disease or other back illness (13% to 15%).

Table 1. Characteristics of the respondents (n=29465) according to study year. The percentages are calculated from the total number of the respondents each year or of the respondents reporting use of at least one prescription or non-prescription medicine within 7 days prior to survey (n=18862)<sup>a</sup>.

| Characteristics                                | Total <sup>b</sup><br>n (%) | Study year    |               |               |               |               |               |               |               |               |               |
|------------------------------------------------|-----------------------------|---------------|---------------|---------------|---------------|---------------|---------------|---------------|---------------|---------------|---------------|
|                                                |                             | 1999<br>n (%) | 2002<br>n (%) | 2005<br>n (%) | 2008<br>n (%) | 2009<br>n (%) | 2010<br>n (%) | 2011<br>n (%) | 2012<br>n (%) | 2013<br>n (%) | 2014<br>n (%) |
| Number of respondents (response rate)          | 29465 (59)                  | 3371 (67)     | 3259 (65)     | 3287 (66)     | 3216 (64)     | 2943 (59)     | 2826 (57)     | 2787 (56)     | 2601 (52)     | 2545 (51)     | 2630 (53)     |
| Respondents using medicines                    | 18862                       | 1944          | 2000          | 2038          | 2101          | 1957          | 1871          | 1844          | 1759          | 1677          | 1671          |
| Gender <sup>c</sup>                            |                             |               |               |               |               |               |               |               |               |               |               |
| Female                                         | 11859 (63)                  | 1217 (63)     | 1278 (64)     | 1258 (62)     | 1332 (63)     | 1235 (63)     | 1181 (63)     | 1128 (61)     | 1101 (63)     | 1061 (63)     | 1068 (64)     |
| Male                                           | 7003 (37)                   | 727 (37)      | 722 (36)      | 780 (38)      | 769 (37)      | 722 (37)      | 690 (37)      | 716 (39)      | 658 (37)      | 616 (37)      | 603 (36)      |
| Age (years) <sup>c</sup>                       |                             |               |               |               |               |               |               |               |               |               |               |
| 15-24                                          | 2535 (13)                   | 314 (16)      | 308 (15)      | 269 (13)      | 270 (13)      | 263 (13)      | 255 (14)      | 231 (13)      | 211 (12)      | 199 (12)      | 215 (13)      |
| 25-34                                          | 2798 (15)                   | 331 (17)      | 308 (15)      | 302 (15)      | 305 (15)      | 287 (15)      | 258 (14)      | 277 (15)      | 251 (14)      | 240 (14)      | 239 (14)      |
| 35-44                                          | 3409 (18)                   | 419 (22)      | 411 (21)      | 394 (19)      | 376 (18)      | 335 (17)      | 304 (16)      | 318 (17)      | 292 (17)      | 275 (16)      | 285 (17)      |
| 45-54                                          | 4558 (24)                   | 481 (25)      | 486 (24)      | 491 (24)      | 490 (23)      | 460 (24)      | 484 (26)      | 438 (24)      | 430 (24)      | 411 (25)      | 387 (23)      |
| 55-64                                          | 5562 (29)                   | 399 (21)      | 487 (24)      | 582 (29)      | 660 (31)      | 612 (31)      | 570 (31)      | 580 (32)      | 575 (32)      | 552 (33)      | 545 (33)      |
| Mean age (Standard deviation)                  | 43.9 (14.1)                 | 41.2 (13.9)   | 42.1 (14.0)   | 43.6 (14.0)   | 44.3 (14.1)   | 44.2 (14.3)   | 44.3 (14.3)   | 44.4 (14.1)   | 44.9 (14.1)   | 45.0 (14.1)   | 44.6 (14.3)   |
| Education level <sup>c</sup>                   |                             |               |               |               |               |               |               |               |               |               |               |
| Primary school or lower ( $\leq 9$ years)      | 3048 (16)                   | 499 (26)      | 444 (22)      | 402 (20)      | 351 (17)      | 306 (16)      | 253 (14)      | 226 (12)      | 222 (13)      | 170 (10)      | 175 (10)      |
| Higher than primary school ( $> 9$ years)      | 15495 (82)                  | 1420 (73)     | 1499 (75)     | 1608 (79)     | 1705 (81)     | 1621 (83)     | 1590 (85)     | 1591 (86)     | 1517 (86)     | 1482 (88)     | 1462 (87)     |
| Working status <sup>c</sup>                    |                             |               |               |               |               |               |               |               |               |               |               |
| Working <sup>d</sup>                           | 12043 (81)                  | -             | -             | 1601 (79)     | 1701 (81)     | 1588 (81)     | 1495 (80)     | 1516 (82)     | 1426 (81)     | 1331 (79)     | 1385 (83)     |
| Not working <sup>e</sup>                       | 2766 (19)                   | -             | -             | 430 (31)      | 396 (19)      | 366 (19)      | 373 (20)      | 299 (16)      | 310 (18)      | 315 (19)      | 277 (17)      |
| Respondents using medicines for <sup>c</sup>   |                             |               |               |               |               |               |               |               |               |               |               |
| Headache                                       | 9806 (52)                   | 1039 (53)     | 1032 (52)     | 1026 (50)     | 1073 (51)     | 1024 (52)     | 980 (52)      | 981 (53)      | 901 (51)      | 866 (52)      | 884 (53)      |
| Ache, pain (other than headache)               | 5467 (29)                   | 556 (29)      | 549 (28)      | 592 (29)      | 604 (29)      | 541 (28)      | 531 (29)      | 550 (30)      | 544 (31)      | 508 (30)      | 492 (29)      |
| High blood pressure                            | 4077 (22)                   | 291 (15)      | 367 (18)      | 429 (21)      | 465 (22)      | 450 (23)      | 434 (23)      | 446 (24)      | 409 (23)      | 395 (24)      | 391 (23)      |
| Contraception (oral)                           | 2310 (12)                   | 264 (14)      | 296 (15)      | 247 (12)      | 258 (12)      | 238 (12)      | 223 (12)      | 193 (11)      | 188 (11)      | 199 (12)      | 204 (12)      |
| High blood cholesterol                         | 2196 (12)                   | 98 (5)        | 143 (7)       | 217 (11)      | 263 (13)      | 296 (15)      | 290 (16)      | 235 (13)      | 217 (12)      | 211 (13)      | 226 (14)      |
| Women's hormone replacement therapy            | 2036 (11)                   | 233 (12)      | 266 (13)      | 233 (11)      | 222 (11)      | 188 (10)      | 188 (10)      | 166 (9)       | 198 (11)      | 174 (10)      | 168 (10)      |
| Cough                                          | 1316 (7)                    | 220 (11)      | 186 (9)       | 168 (8)       | 160 (8)       | 113 (6)       | 77 (4)        | 111 (6)       | 101 (6)       | 103 (6)       | 77 (5)        |
| Insomnia                                       | 1497 (8)                    | 136 (7)       | 153 (8)       | 153 (8)       | 179 (9)       | 177 (9)       | 140 (8)       | 139 (8)       | 134 (8)       | 146 (9)       | 140 (8)       |
| Sedation                                       | 915 (5)                     | 133 (7)       | 93 (5)        | 121 (6)       | 102 (5)       | 94 (5)        | 70 (4)        | 85 (5)        | 76 (4)        | 69 (4)        | 72 (4)        |
| Men's sexual potency dysfunction               | 252 (1)                     | 13 (1)        | 20 (1)        | 28 (1)        | 26 (1)        | 21 (1)        | 26 (1)        | 37 (2)        | 34 (2)        | 19 (1)        | 28 (2)        |
| Depression                                     | 1314 (7)                    | -             | 111 (6)       | 143 (7)       | 148 (7)       | 176 (9)       | 136 (5)       | 147 (8)       | 173 (10)      | 134 (8)       | 146 (9)       |
| Diabetes (other than insulin)                  | 705 (4)                     | -             | -             | 72 (4)        | 82 (4)        | 88 (4)        | 88 (5)        | 80 (4)        | 98 (6)        | 91 (5)        | 106 (6)       |
| Diabetes (insulin)                             | 361 (2)                     | -             | -             | 46 (2)        | 49 (2)        | 46 (2)        | 47 (3)        | 51 (3)        | 36 (2)        | 50 (3)        | 36 (2)        |
| Number of medicines in use/person <sup>c</sup> |                             |               |               |               |               |               |               |               |               |               |               |
| 1                                              | 10558 (56)                  | 1215 (63)     | 1183 (59)     | 1143 (56)     | 1154 (55)     | 1060 (54)     | 1029 (55)     | 1011 (55)     | 946 (54)      | 907 (54)      | 910 (54)      |
| 2                                              | 5116 (27)                   | 505 (26)      | 559 (28)      | 566 (28)      | 584 (28)      | 536 (27)      | 512 (27)      | 491 (27)      | 492 (28)      | 442 (26)      | 429 (26)      |

|                                                                  |           |           |           |          |          |          |          |          |          |          |          |
|------------------------------------------------------------------|-----------|-----------|-----------|----------|----------|----------|----------|----------|----------|----------|----------|
| 3                                                                | 1984 (11) | 161 (8)   | 166 (8)   | 198 (10) | 221 (11) | 220 (11) | 210 (11) | 210 (11) | 191 (11) | 208 (12) | 199 (12) |
| >3                                                               | 1204 (6)  | 63 (3)    | 92 (5)    | 131 (6)  | 142 (7)  | 141 (7)  | 120 (6)  | 132 (7)  | 130 (7)  | 120 (7)  | 133 (8)  |
| Respondents with diagnosed diseases <sup>c,f</sup>               |           |           |           |          |          |          |          |          |          |          |          |
| High blood pressure, hypertension                                | 4297 (23) | 345 (18)  | 426 (21)  | 465 (23) | 496 (24) | 478 (24) | 443 (24) | 468 (25) | 421 (24) | 379 (22) | 376 (23) |
| Degenerative disc disease, other back illness                    | 2712 (14) | 262 (14)  | 284 (14)  | 314 (15) | 321 (15) | 263 (13) | 260 (14) | 272 (15) | 260 (15) | 227 (14) | 249 (15) |
| Asthma                                                           | 1163 (6)  | 113 (6)   | 114 (6)   | 112 (6)  | 120 (6)  | 132 (7)  | 125 (7)  | 113 (6)  | 120 (7)  | 99 (6)   | 115 (7)  |
| Digestive illness (gastritis catarrh, gastritis, ulcer)          | 904 (5)   | 96 (5)    | 97 (5)    | 108 (5)  | 110 (5)  | 93 (5)   | 91 (5)   | 70 (4)   | 85 (5)   | 89 (5)   | 65 (4)   |
| Coronary disease, angina pectoris (= chest pain during exercise) | 414 (2)   | 66 (3)    | 48 (2)    | 52 (3)   | 47 (2)   | 35 (2)   | 41 (2)   | 34 (2)   | 31 (2)   | 26 (2)   | 30 (2)   |
| Diabetes                                                         | 1092 (6)  | 50 (2)    | 78 (4)    | 113 (6)  | 121 (6)  | 129 (7)  | 121 (7)  | 110 (6)  | 124 (7)  | 108 (6)  | 138 (8)  |
| Rheumatoid arthritis                                             | 396 (2)   | 46 (2)    | 36 (2)    | 37 (2)   | 46 (2)   | 37 (2)   | 40 (2)   | 41 (2)   | 44 (3)   | 37 (2)   | 32 (2)   |
| Chronic bronchitis, pulmonary emphysema                          | 322 (2)   | 34 (2)    | 30 (2)    | 35 (2)   | 38 (2)   | 52 (3)   | 28 (2)   | 36 (2)   | 20 (1)   | 22 (1)   | 27 (2)   |
| Coronary thrombosis, myocardial infarction                       | 118 (1)   | 9 (1)     | 13 (1)    | 13 (1)   | 13 (1)   | 8 (<1)   | 11 (1)   | 17 (1)   | 10 (1)   | 9 (1)    | 15 (1)   |
| High blood cholesterol                                           | 2913 (17) | -         | 267 (13)  | 338 (17) | 356 (17) | 409 (21) | 368 (20) | 319 (17) | 282 (16) | 287 (16) | 287 (17) |
| Depression                                                       | 1242 (8)  | -         | -         | 173 (9)  | 175 (8)  | 178 (9)  | 134 (7)  | 150 (8)  | 161 (9)  | 124 (7)  | 147 (9)  |
| Other mental health disorder                                     | 534 (4)   | -         | -         | 64 (3)   | 73 (4)   | 66 (3)   | 47 (3)   | 82 (4)   | 65 (4)   | 73 (4)   | 64 (4)   |
| Cancer                                                           | 206 (1)   | -         | -         | 29 (1)   | 26 (1)   | 26 (1)   | 28 (2)   | 23 (1)   | 34 (2)   | 23 (1)   | 17 (1)   |
| Hay or allergic rhinitis                                         | 2044 (16) | -         | -         | -        | 340 (16) | 292 (15) | 275 (15) | 272 (15) | 283 (16) | 275 (16) | 307 (18) |
| Food allergy                                                     | 580 (5)   | -         | -         | -        | 85 (4)   | 84 (4)   | 92 (4)   | 78 (4)   | 85 (5)   | 72 (4)   | 84 (5)   |
| Number of diagnosed diseases/person <sup>c,f</sup>               |           |           |           |          |          |          |          |          |          |          |          |
| 0                                                                | 8590 (46) | 1228 (63) | 1121 (56) | 971 (48) | 850 (40) | 772 (39) | 796 (43) | 746 (40) | 705 (40) | 712 (42) | 689 (41) |
| 1                                                                | 5176 (27) | 502 (26)  | 527 (26)  | 593 (29) | 605 (29) | 546 (28) | 482 (26) | 517 (28) | 499 (28) | 455 (27) | 450 (27) |
| 2                                                                | 2924 (16) | 151 (8)   | 232 (12)  | 270 (13) | 367 (17) | 358 (18) | 335 (18) | 345 (19) | 302 (17) | 279 (17) | 285 (17) |
| >2                                                               | 2172 (12) | 63 (5)    | 120 (6)   | 204 (10) | 279 (13) | 281 (14) | 258 (14) | 236 (13) | 253 (14) | 231 (14) | 247 (15) |

<sup>a</sup>Discrepancies in totals are due to rounding errors, <sup>b</sup>Calculated from study years available, <sup>c</sup>Percentages have been calculated for the respondents of each year who reported using medicines, including prescription and non-prescription medicines (list in the survey) during the last week (7 days), <sup>d</sup>Including at work, partly at work, laid off, student, homemaker, on sick leave (>6 months), or otherwise out of work, <sup>e</sup>Including retired and unemployed, <sup>f</sup>Respondents who had a disease (list in the survey) diagnosed by a physician during the last year (12 months).

### Medicines information sources among adult medicine users

The most commonly reported MI sources were physicians, community pharmacists and package leaflets throughout the study period 1999-2014 among adult medicine users (n=18862) (Fig. 1). These information sources were most common despite gender, age, number of medicines in use or diagnosed diseases (Appendix A,B). Receipt of MI from physicians (from 62% in 1999 to 47% in 2014) and package leaflets (44% to 34%) decreased most during the study period, while remained stable from community pharmacists (46% to 45%) and nurses (14% to 14%) (Fig. 1). In 1999, of the medicine users 17% (n=335/1944) did not report any healthcare professionals (physicians, community pharmacists or nurses) as their source of MI, and by 2014 the proportion had grown to 38% (n=639/1671). The use of the Internet as MI source increased rather steadily being 1% in 1999 and 16% in 2014.

Add figure 1 in here.

The number of MI sources from which medicine users (n=18862) reported receipt of MI changed over the study period 1999-2014 (Fig. 2). The most noticeable decreases occurred in those who reported receipt of MI from one (47% to 21%) or two (30 % to 22%) sources. The number of medicine users receiving MI from more than two sources increased moderately. In 1999, of the medicine users 4% (n=77/1944) did not report receipt of MI from any of the information sources listed in the survey, while this proportion had increased to 28% (n=467/1671) in 2014.

Add figure 2 in here.

### Receipt of medicines information and associated factors

Gender and age influenced the receipt of MI throughout the study period 1999-2014 (Appendix A). Women reported receiving MI from all information sources listed in the survey more commonly than men during the study period. Receipt of MI from physicians decreased most among women (from 66% in 1999 to 48% in 2014) and among medicine users aged over 45 years (75% to 52%). Receipt of MI from package leaflets decreased both in women (48% to 38%) and men (36% to 26%), while remained nearly unchanged from community pharmacists (51% to 47% in women vs. 37% to 42% in men). The receipt of MI from community pharmacists increased most among medicine users aged 55-64 years (34% to 46%), and decreased most among medicine users aged 33-44 years (55% to 43%). Package leaflets, relatives and friends were reported to be most common MI sources for medicine users under 25 years, although receipt of MI from package leaflets (59% to 37%) and from relatives and friends (35% to 16%) decreased most in this age group. Receipt of MI from the Internet increased

1  
2  
3 in both genders, slightly more in women than in men (2% to 18% vs. 1% to 12%, respectively), and in  
4 all age groups, most among medicine users aged 25-34 years (2% to 21%) and 15-24 years (2% to  
5 20%). More male (6% to 33%) than female (3% to 25%) and more medicine users under 45 years (5%  
6 to 33%) than medicine users 45 years or older (3% to 25%) did not report receipt of MI from any of  
7 the information sources listed in the survey during the study period.  
8  
9

10  
11 The number of medicines in use and the number of diagnosed diseases influenced the receipt of MI  
12 (Appendix B). In general, as the number of medicines in use or the number of diagnosed diseases  
13 increased, the number of different MI sources increased. However, the opposite changes occurred in  
14 the receipt of MI from physicians, the proportion of medicine users receiving MI from physicians  
15 decreased 14-26% depending on the number of medicines in use or the number of diagnosed diseases,  
16 the highest decline occurring for medicine users with two medicines (76% to 52%) and for medicine  
17 users with two diagnosed diseases (83% to 57%). The number of medicines and the number of  
18 diagnosed diseases had the opposite influence on the receipt of MI from community pharmacists. The  
19 receipt of MI from community pharmacists increased most in medicine users with three medicines  
20 (47% to 59%) and in those with three or more diagnosed diseases (49% to 63%), whereas the receipt  
21 of MI decreased most in medicine users with one medicine (44% to 38%) and in those medicine users  
22 without any diagnosed diseases (45% to 34%). Receipt of MI package leaflets decreased mainly in all  
23 medicine users, most in those with one (40% to 28%) or two (48% to 35%) medicines in use and in  
24 medicine users without any diagnosed diseases (44% to 30%) or in those with one diagnosed disease  
25 (43% to 31%). Receipt of MI from the Internet increased in all medicine users regardless the number  
26 of medicines in use or the number of diagnosed diseases, most among respondents with two (1% to  
27 19%) and four or more medicines (5% to 22%), and respondents with three or more diagnosed  
28 diseases (3% to 23%). Respondents using one (6% to 35%) or two (1% to 24%) medicines and  
29 medicine users without any diagnosed disease listed in the survey (5% to 38%) or with one disease  
30 (2% to 25%) most commonly did not report receipt of MI from any of the information sources listed  
31 in the survey during the study period.  
32  
33  
34  
35  
36  
37  
38  
39  
40  
41  
42  
43

44 Overall, the mean number of medicines in use and the mean number of diagnosed diseases increased  
45 slightly among medicine users, while the mean number of MI sources from which MI was received  
46 remained relatively stable during the study period 1999-2014 (Fig. 3). The ratio between the mean  
47 number of medicines in use and the mean number of MI sources from which MI was received  
48 remained relatively stable, but the ratio between the mean number of diagnosed diseases and the mean  
49 number of MI sources increased.  
50  
51  
52

53  
54  
55 Add figure 3. in here.  
56  
57  
58  
59  
60

## DISCUSSION

To our knowledge, this is the first study analyzing long-term national trends in the receipt of MI among adult population. The 15-year period covered in this study (1999-2014) provides unique insights into how improved consumer access to MI and the shift from paper to cyber have influenced receipt of MI from various sources. It seems that the key MI sources (physicians, community pharmacists, package leaflets) have remained similar which is in line with previous studies.<sup>21-47</sup> Surprising was that even though the availability and the use of MI sources has diversified among the adult population, an increasing number of medicine users did not report receipt of MI from any of the sources. The proportion of medicine users who did not reporting receiving MI from any of the listed sources became 7-fold during the study period (4% to 28%). Furthermore, the proportion of those who did not report receiving MI on medicines they used from any of the healthcare professionals more than doubled from 17% in 1999 to 38% in 2014. Particularly, MI received from the physicians declined over time. The decline was similar (22-26%) in respondents using 2 or more medicines or having or not having diagnosed diseases. According to age, the decline was most evident among medicine users 45 years and older. These findings may indicate the fact that physicians' involvement in patient care has diminished due to changes in the healthcare system and limited resources. Consequently, those medicine users who were dependent on MI received from their physicians do not have that source available anymore. It also seems that community pharmacists have become more common sources of MI for people with multiple medications instead of physicians, but nurses have not replaced physicians as a MI source. In the future, special attention should be paid to the receipt of MI among people with multiple diseases and medications and the aging populations whose proportion is growing.

Our findings indicate that MI is not evenly distributed among medicine users, it may have become more unevenly distributed over time. According to the present study, gender, age, number of medicines in use and number of diseases influence the receipt of MI. During the study period, women, people aged 45 years or older, people with three or more medicines in use and people with three or more diagnosed diseases received MI more commonly on their medicines than other adult medicine users. These findings are in line with other cross-sectional studies.<sup>23,25,26,40,41</sup> Other previous studies have shown that MI seeking behavior and the use of MI sources is usually influenced by gender and age, but also education, ethnic background, income, employment, health status and medical history.<sup>27,34,39</sup> Potential reasons and system-based root causes for differences in the receipt of MI among medicine users need to be addressed in future research. Our example from Finland demonstrates that availability of a wide range of MI sources does not necessarily guarantee their actual and evenly distributed use among medicine users.

1  
2  
3  
4 This study indicates that the receipt of MI from the Internet is still quite rare when the entire adult  
5 population is considered. By 2014, only 16% of medicine users reported that they had received  
6 information on medicines they used from the Internet. According to previous studies, use of the  
7 Internet as a source of MI has varied between 4% and 29% in the 2000s.<sup>22,25,31,33,34,39,40,42,44-46</sup> It is also  
8 known that some patient and medicine user groups use the Internet considerably more (59-68%) than  
9 the adult population in general, e.g. patients with chronic conditions and pregnant women.<sup>27,28,41</sup> Thus,  
10 if we want to reach the majority of the adult population, we could not solely count on the Internet-  
11 based MI sources and services. Further population-based research is needed to get a more  
12 comprehensive understanding of the importance and usage patterns of the Internet as a MI source,  
13 also the opportunities it provides for improving MI for various medication user segments.  
14  
15  
16  
17  
18  
19  
20

### 21 **Strengths and limitations of this study**

22  
23 The annual response rates were reasonably high, and the repeated nationally representative population  
24 surveys allow for examination of trends over time at the population level and make the results  
25 generalizable to the Finnish adult population. The overall annual response rates decreased from 67%  
26 to 53% during the study period, but the response rates of medicine users increased from 58% to 64%.  
27 The decreasing response rates in our study follow a more general phenomenon of decreasing response  
28 rates for postal population surveys.<sup>57</sup> Due to the cross-sectional method without cohorts, it is not  
29 possible to follow up changes in the receipt of MI over time at the individual level. The respondents  
30 did not have the opportunity to report MI from other sources than those listed in the survey and to  
31 report separately MI sources on prescription and non-prescription medicines. The data did not provide  
32 any information about the quality, validity or amount of the MI received.  
33  
34  
35  
36  
37  
38  
39

### 40 **Implications and future research**

41  
42 The strategic development of MI will continue both nationally and internationally in order to ensure  
43 the availability and access to reliable, up-to-date and high quality MI and MI sources.<sup>2,4,13,58</sup> As part of  
44 this work, it is necessary to continue research on trends in the receipt of MI at the population level and  
45 to identify population groups needing special attention in this respect. Consumers' MI literacy skills  
46 should be further investigated and MI literacy should be included in the development of MI for  
47 different patient and medicine user groups, e.g. the question related to MI literacy could be included  
48 in population surveys. Factors contributing to a growing number of medicine users not receiving MI  
49 from any sources should be focused on in future research.  
50  
51  
52  
53  
54  
55  
56  
57  
58  
59  
60



## CONCLUSIONS

In this longitudinal analysis of adult medicine users' receipt of MI about the medicines they use, physicians, community pharmacists and package leaflets still had a dominating importance in 2014 despite the growing number of novel and innovative MI sources available. Internet is still quite a rare source of MI when the entire adult population is considered. Factors contributing to a growing number of adult medicine users not receiving MI from any sources should be better understood and focused on in future research.

1  
2  
3  
4  
5 We thank the National Institute for Health and Welfare for providing their incidence data and  
6 consumers who participated in the study and the pilot study. We gratefully acknowledge the support  
7 the Finnish Cultural Foundation, the Elli Turunen Fund, in conducting this study. We warmly thank  
8 Richard Stevenson for proofreading the manuscript.  
9

10 **Contributors:** All authors contributed to study conception and design, to acquisition, analysis, or  
11 interpretation of data. NM was the principal investigator, analyzed the data and drafted the  
12 manuscript; all authors revised the manuscript for critical intellectual content. All authors had full  
13 access to all of the data (including statistical reports and tables) in the study and take responsibility for  
14 the integrity of the data and the accuracy of the data analysis. All authors read and approved the final  
15 version.  
16

17 **Funding:** This work was supported by the Finnish Cultural Foundation, the Elli Turunen Fund.  
18

19 **Competing interests:** None declared.  
20

21 **Patient consent:** Not required.  
22  
23

24 **Ethical approval:** As this study was a secondary analysis using routinely collected and fully  
25 anonymized data, ethics approval was not applicable. Answering the survey was considered as giving  
26 informed consent. The study followed the national ethical guidelines for researchers<sup>56</sup>. All study  
27 procedures were conducted in accordance with good research practice.  
28  
29

30 **Data sharing:** No additional data available.  
31  
32  
33  
34  
35  
36  
37  
38  
39  
40  
41  
42  
43  
44  
45  
46  
47  
48  
49  
50  
51  
52  
53  
54  
55  
56  
57  
58  
59  
60

**REFERENCES**

- 1 Bailey SC, Belter LT, Pandit AU, et al. The availability, functionality, and quality of mobile applications supporting medication self-management. *J Am Med Inform Assoc* 2014;21:542–6. 10.1136/amiainl-2013-002232
- 2 Finnish Medicines Agency Fimea. Rational use of medicines through information and guidance. Medicines information services: Current state and strategy for 2020. *Serial Publication Fimea Develops, Assesses and Informs* 1/2012. 2012. [https://www.fimea.fi/documents/542809/838272/21513\\_KAI\\_JULKAISUSARJA\\_Laakeinformaatiostrategia\\_1\\_2012\\_eng\\_links.pdf](https://www.fimea.fi/documents/542809/838272/21513_KAI_JULKAISUSARJA_Laakeinformaatiostrategia_1_2012_eng_links.pdf) (accessed 23 Aug 2018)
- 3 Ho I, Nielsen L, Jacobsgaard H, et al. Chat-based telepharmacy in Denmark: Design and early results. *Int J Pharm Pract* 2015;23:61–6. 10.1111/ijpp.12109
- 4 International Pharmaceutical Federation. Medicines information: Strategic development. The Hague: International Pharmaceutical Federation. 2017. <https://fip.org/files/fip/publications/2017-01-Medicines-information-strategic-development.pdf> (accessed 21 Jun 2018).
- 5 Lee K, Hoti K, Hughes JD, et al. Dr Google and the consumer: A qualitative study exploring the navigational needs and online health information-seeking behaviors of consumers with chronic health conditions. *J Med Internet Res* 2014;16:e262. 10.2196/jmir.3706
- 6 Mononen N, Järvinen R, Hämeen-Anttila K, et al. A national approach to medicines information research: A systematic review. *Res Soc Adm Pharm* Published Online First: 31 January 2018. 10.1016/j.sapharm.2018.01.011
- 7 Pohjanoksa-Mäntylä M. Medicines information sources and services for consumers: A special focus on the Internet and people with depression [dissertation]. University of Helsinki. 2010. <http://urn.fi/URN:ISBN:978-952-10-6128-8>
- 8 Benetoli A, Chen TF, Spagnardi S, et al. Provision of a medicines information service to consumers on Facebook: An Australian case study. *J Med Internet Res* 2015;17:e265. 10.2196/jmir.4161
- 9 Eysenbach G, Powell J, Englesakis M, et al. Health related virtual communities and electronic support groups: Systematic review of the effects of online peer to peer interactions. *BMJ* 2004;328:1166. 10.1136/bmj.328.7449.1166
- 10 Hanlon P, Daines L, Campbell C, et al. Telehealth interventions to support self-management of long-term conditions: A systematic metareview of diabetes, heart failure, asthma, chronic obstructive pulmonary disease, and cancer. *J Med Internet Res* 2017;19:e172. 10.2196/jmir.6688
- 11 Department of Health. Better information, better choices, better health: Putting information at the centre of health. 2004. [http://www.formazione.eu.com/\\_documents/consenso/documenti/better%20information.pdf](http://www.formazione.eu.com/_documents/consenso/documenti/better%20information.pdf) (accessed 21 Jun 2018).
- 12 Department of Health. The power of information: Putting all of us in control of the health and care information we need. 2012. [https://data.gov.uk/sites/default/files/DH%20Open%20Data%20Strategy\\_10.pdf](https://data.gov.uk/sites/default/files/DH%20Open%20Data%20Strategy_10.pdf) (accessed 21 Jun 2018).

- 1  
2  
3 13 European Commission. High Level Pharmaceutical Forum 2005-2008: Conclusions and  
4 recommendations. European Communities. 2008. 10.2772/22720  
5  
6 14 Ministry of Health and Social Affairs. The national pharmaceutical strategy 2016–2018.  
7 Government Offices of Sweden. 2015. [https://lakemedelsverket.se/upload/om-](https://lakemedelsverket.se/upload/om-lakemedelsverket/NLS/The-National-Pharmaceutical-Strategy-2016-2018.pdf)  
8 [lakemedelsverket/NLS/The-National-Pharmaceutical-Strategy-2016-2018.pdf](https://lakemedelsverket/NLS/The-National-Pharmaceutical-Strategy-2016-2018.pdf) (accessed 21 Jun 2018).  
9  
10 15 Ministry of Social Affairs and Health. Medicines Policy 2020: Towards efficient, safe, rational and  
11 cost effective use of medicines. Ministry of Social Affairs and Health. 2011.  
12 <http://urn.fi/URN:ISBN:978-952-00-3101-5> (accessed 21 Jun 2018).  
13  
14 16 Pharmaceutical Society of Ireland. Future pharmacy practice in Ireland: Meeting patients' needs.  
15 2016.  
16 [https://www.thepsi.ie/Libraries/Pharmacy\\_Practice/PSI\\_Future\\_Pharmacy\\_Practice\\_in\\_Ireland.sflb.as](https://www.thepsi.ie/Libraries/Pharmacy_Practice/PSI_Future_Pharmacy_Practice_in_Ireland.sflb.as)  
17 [hx](https://www.thepsi.ie/Libraries/Pharmacy_Practice/PSI_Future_Pharmacy_Practice_in_Ireland.sflb.as) (accessed 21 Jun 2018).  
18  
19 17 Finney Rutten LJ, Agunwamba AA, Wilson P, et al. Cancer-related information seeking among  
20 cancer survivors: Trends over a decade (2003-2013). *J Cancer Educ* 2016;31:348–57.  
21 10.1007/s13187-015-0802-7  
22  
23 18 Kalantzi S, Kostagiolas P, Kechagias G, et al. Information seeking behavior of patients with  
24 diabetes mellitus: A cross-sectional study in an outpatient clinic of a university-affiliated hospital in  
25 Athens, Greece. *BMC Res Notes* 2015;8:48. 10.1186/s13104-015-1005-3  
26  
27 19 Somera LP, Lee HR, Badowski G, et al. Health information seeking, source trust, and culture: A  
28 comparative analysis of health information trends and needs between Guam and the United States. *J*  
29 *Health Commun* 2016;21:469–78. 10.1080/10810730.2015.1095822  
30  
31 20 Volkman JE, Luger TM, Harvey KLL, et al. The National Cancer Institute's Health Information  
32 National Trends Survey [HINTS]: A national cross-sectional analysis of talking to your doctor and  
33 other healthcare providers for health information. *BMC Fam Pract* 2014;15:111. 10.1186/1471-2296-  
34 15-111  
35  
36 21 Raynor DK, Savage I, Knapp P, et al. We are the experts: people with asthma talk about their  
37 medicines information needs. *Patient Educ Couns* 2004;53:167–74. 10.1016/S0738-3991(03)00126-5  
38  
39 22 Chen X, Siu LL. Impact of the media and the internet on oncology: survey of cancer patients and  
40 oncologists in Canada. *J Clin Oncol* 2001;19:4291–7. 10.1200/JCO.2001.19.23.4291  
41  
42 23 Bults M, Beaujean DJMA, Wijkmans CJ, et al. Why did patients with cardiovascular disease in the  
43 Netherlands accept Q fever vaccination? *Vaccine* 2012;30:3369–75. 10.1016/j.vaccine.2012.03.056  
44  
45 24 Zukoski AP, Thorburn S, Stroud J. Seeking information about HIV/AIDS: A qualitative study of  
46 health literacy among people living with HIV/AIDS in a low prevalence context. *AIDS care*  
47 2011;23:1505–8. 10.1080/09540121.2011.582077  
48  
49 25 Pohjanoksa-Mäntylä M, Bell JS, Helakorpi S, et al. Is the Internet replacing health professionals?  
50 A population survey on sources of medicines information among people with mental disorders. *Soc*  
51 *Psychiatry Psychiatr Epidemiol* 2011;46:373–9. 10.1007/s00127-010-0201-7  
52  
53 26 Carpenter DM, DeVellis RF, Hogan SL, et al. Use and perceived credibility of medication  
54 information sources for patients with a rare illness: Differences by gender. *J Health Commun*  
55 2011;16:629–42. 10.1080/10810730.2011.551995  
56  
57  
58  
59

- 1  
2  
3 27 Hämeen-Anttila K, Jyrkkä J, Enlund H, et al. Medicines information needs during pregnancy: A  
4 multinational comparison. *BMJ Open* 2013;3:e002594. 10.1136/bmjopen-2013-002594  
5  
6 28 Hämeen-Anttila K, Nordeng H, Kokki E, et al. Multiple information sources and consequences of  
7 conflicting information about medicine use during pregnancy: A multinational Internet-based survey.  
8 *J Med Internet Res* 2014;16:e60. 10.2196/jmir.2939  
9  
10 29 Tiihonen MJ, Heikkinen AM, Ahonen RS. Do Finnish women using hormone replacement therapy  
11 need more information about risks. *Pharm World Sci* 2007;29:635–40. 10.1007/s11096-007-9115-1  
12  
13 30 Tiihonen M, Saarela M, Saarinen S, et al. Menopausal hormone therapy — Benefits, adverse  
14 reactions, concerns and information sources in 2009. *Maturitas* 2011;70:69–73.  
15 10.1016/j.maturitas.2011.06.001  
16  
17 31 Wathen CN. Health information seeking in context: How women make decisions regarding  
18 hormone replacement therapy. *J Health Commun* 2006;11:477–93. 10.1080/10810730600751979  
19  
20 32 Ngo SNT, Stupans I, Leong WS, et al. Appropriate use of non-prescription ibuprofen: A survey of  
21 patients' perceptions and understanding. *Int J Pharm Pract* 2010;18:63–5. 10.1211/ijpp.18.01.0011  
22  
23 33 Närhi U, Helakorpi S. Analgesic users' sources of medicine information. *Int J Pharm Pract*  
24 2007;15:251–3. 10.1211/ijpp.15.3.0013  
25  
26 34 Sleath B, Wurst K, Lowery T. Drug information sources and antidepressant adherence. *Community*  
27 *Ment Health J* 2003;39:359–68. 10.1023/A:1024080410284  
28  
29 35 Baldwin AS, Cvangros JA, Christensen AJ, et al. Preferences for a patient-centered role  
30 orientation: Association with patient-information-seeking behavior and clinical markers of health. *Ann*  
31 *Behav Med* 2008;35:80–6. 10.1007/s12160-007-9011-x  
32  
33 36 Gordon K, Smith F, Dhillon S. Effective chronic disease management: Patients' perspectives on  
34 medication-related problems. *Patient Educ Couns* 2007;65:407–15. 10.1016/j.pec.2006.09.012  
35  
36 37 Black E, Murphy AL, Gardner DM. Community pharmacists services for people with mental  
37 illnesses: Preferences, satisfaction, and stigma. *Psychiatr Serv* 2009;60:1123–7.  
38 10.1176/ps.2009.60.8.1123  
39  
40 38 Carter SR, Moles R, White L, et al. Medication information seeking behavior of patients who use  
41 multiple medicines: How does it affect adherence? *Patient Educ Couns* 2013;92:74–80.  
42 10.1016/j.pec.2013.01.019  
43  
44 39 DeLorme DE, Huh J, Reid LN. Source selection in prescription drug information seeking and  
45 influencing factors: Applying the comprehensive model of information seeking in an American  
46 context. *J Health Commun* 2011;16:766–87. 10.1080/10810730.2011.561914  
47  
48 40 Ho CH, Ko Y, Tan ML. Patient needs and sources of drug information in Singapore: Is the internet  
49 replacing former sources? *Ann Pharmacother* 2009;43:732–9. 10.1345/aph.1L580  
50  
51 41 Hämeen-Anttila K, Pietilä K, Pylkkänen L, et al. Internet as a source of medicines information  
52 (MI) among frequent internet users. *Res Soc Adm Pharm* 2018;14:758–64.  
53 10.1016/j.sapharm.2017.09.007  
54  
55 42 Krska J, Morecroft CW. Patients' use of information about medicine side effects in relation to  
56 experiences of suspected adverse drug reactions: A cross-sectional survey in medical in-patients.  
57 *Drug Saf* 2013;36:673–80. 10.1007/s40264-013-0065-3  
58  
59  
60

- 1  
2  
3  
4  
5 43 Newby DA, Hill SR, Barker BJ, et al. Drug information for consumers: should it be disease or  
6 medication specific? Results of a community survey. *Aust N Z J Public Health* 2001;25:564–70.  
7 10.1111/j.1467-842X.2001.tb00327.x
- 8  
9 44 Närhi U. Sources of medicine information and their reliability evaluated by medicine users. *Pharm*  
10 *World Sci* 2007;29:688–94. 10.1007/s11096-007-9131-1
- 11  
12 45 Närhi U, Helakorpi S. Sources of medicine information in Finland. *Health Policy* 2007;84:51–7.  
13 10.1016/j.healthpol.2007.05.005
- 14  
15 46 Tio J, LaCaze A, Neil Cottrell WN. Ascertaining consumer perspectives of medication information  
16 sources using a modified repertory grid technique. *Pharm World Sci* 2007;29:73–80. 10.1007/s11096-  
17 006-9076-9
- 18  
19 47 Tiihonen M, Heikkinen AM, Leppänen HM, et al. Information sources used by women in Finland  
20 who use hormonal contraceptives. *Pharm World Sci* 2010;32:66–72. 10.1007/s11096-009-9344-6
- 21  
22 48 Vainio K. Developing patient counselling in Finnish community pharmacies [dissertation].  
23 University of Kuopio. 2004. <http://urn.fi/URN:ISBN:951-27-0048-4>
- 24  
25 49 Council Directive 92/27/EEC of 31 March 1992 on the labelling of medicinal products for human  
26 use and on package leaflets. Council of the European Communities. 1992.  
27 <http://data.europa.eu/eli/dir/1992/27/oj>
- 28  
29 50 Finnish Medicine Agency Fimea. SmPCs and PLs.  
30 [www.fimea.fi/web/en/databases\\_and\\_registeries/spes](http://www.fimea.fi/web/en/databases_and_registeries/spes) (accessed 21 Jun 2018).
- 31  
32 51 Pharmaceutical Information Centre. Package leaflets of medicinal products. Finnish.  
33 <https://laakeinfo.fi/Frontpage.aspx> (accessed 21 Jun 2018).
- 34  
35 52 Helldán A, Helakorpi S, editors. Health behaviour and health among the Finnish adult population,  
36 Spring 2014. National Institute for Health and Welfare. 2015. [http://urn.fi/URN:ISBN:978-952-302-  
37 447-2](http://urn.fi/URN:ISBN:978-952-302-447-2)
- 38  
39 53 Airaksinen M. Customer feedback as a tool for improving pharmacy services in Finland  
40 [dissertation]. University of Kuopio. 1996.
- 41  
42 54 Airaksinen M, Ahonen R, Enlund H. The questions to ask about your medicines campaign — An  
43 evaluation of pharmacists and the public's response. *Med Care* 1998;36:422–7.
- 44  
45 55 Vainio K, Airaksinen M, Väisänen T, et al. Assessing the importance of community pharmacists as  
46 providers of drug information. *J Appl Ther Res* 2004;5:24–9.
- 47  
48 56 Finnish National Advisory Board on Research Ethics. Ethical principles of research in the  
49 humanities and social and behavioural sciences and proposals for ethical review. 2009.  
50 [www.tenk.fi/sites/tenk.fi/files/ethicalprinciples.pdf](http://www.tenk.fi/sites/tenk.fi/files/ethicalprinciples.pdf) (accessed 21 Jun 2018).
- 51  
52 57 Tolonen H, Helakorpi S, Talala K, et al. 25-year trends and socio-demographic differences in  
53 response rates: Finnish adult health behaviour survey. *Eur J Epidemiol* 2006;21:409–15.  
54 10.1007/s10654-006-9019-8
- 55  
56 58 European Commission. High Level Group on innovation and provision of medicines in the  
57 European Union: Recommendations for action. G10 Medicines report, European Communities. 2002.  
58 [http://ec.europa.eu/health/ph\\_overview/Documents/key08\\_en.pdf](http://ec.europa.eu/health/ph_overview/Documents/key08_en.pdf) (accessed 21 Jun 2018).

## LEGENDS OF THE FIGURES

Fig. 1 Trends in the receipt of medicines information among adult medicine users (n=18862) in 1999-2014 (% of the respondents who reported use of at least one prescription or non-prescription medicine within 7 days prior to the survey). The survey was not conducted in 2000, 2001, 2003, 2004, 2006 and 2007.

Fig. 2 Number of medicines information sources from which the adult medicine users (n=18862) had received information on the medicines they used. The survey was not conducted in 2000, 2001, 2003, 2004, 2006 and 2007.

Fig. 3 Ratio between mean number of medicines in use and mean number of diagnosed diseases compared to the mean number of medicines information sources from which the medicine users (n=18862) received medicines information. The survey was not conducted in 2000, 2001, 2003, 2004, 2006 and 2007.

FIGURES 1-3

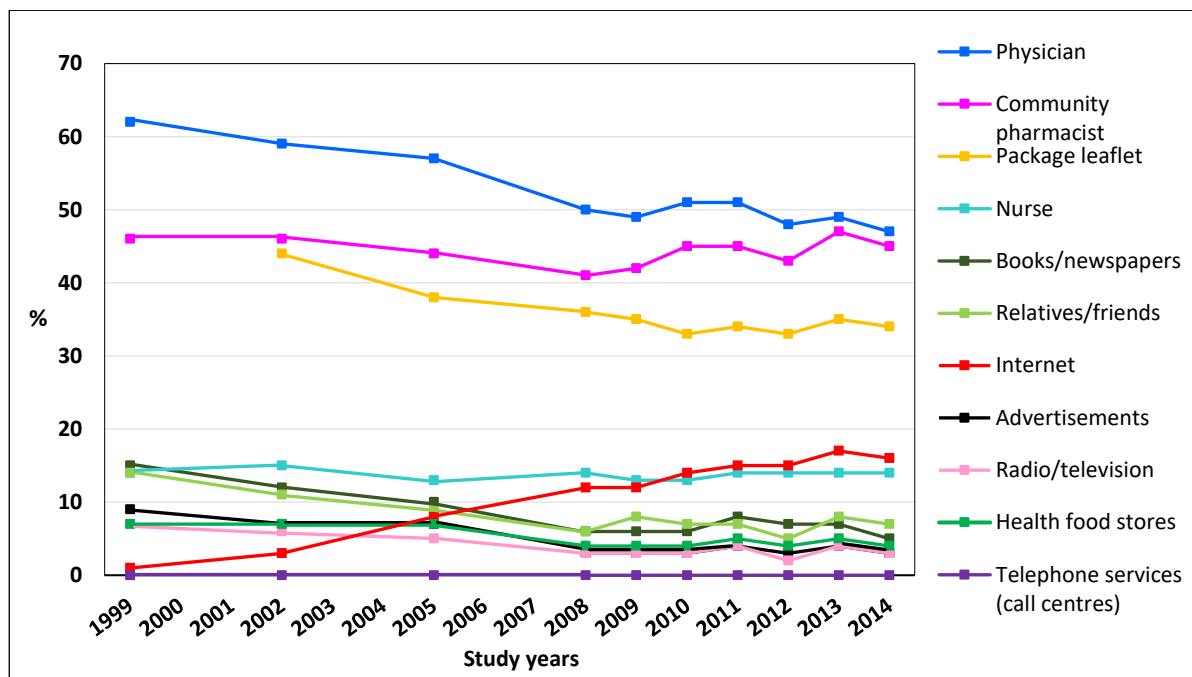

**Fig 1** Trends in the receipt of medicines information among adult medicine users (n=18862) in 1999-2014 (% of the respondents who reported use of at least one prescription or non-prescription medicine within 7 days prior to the survey). The survey was not conducted in 2000, 2001, 2003, 2004, 2006 and 2007.

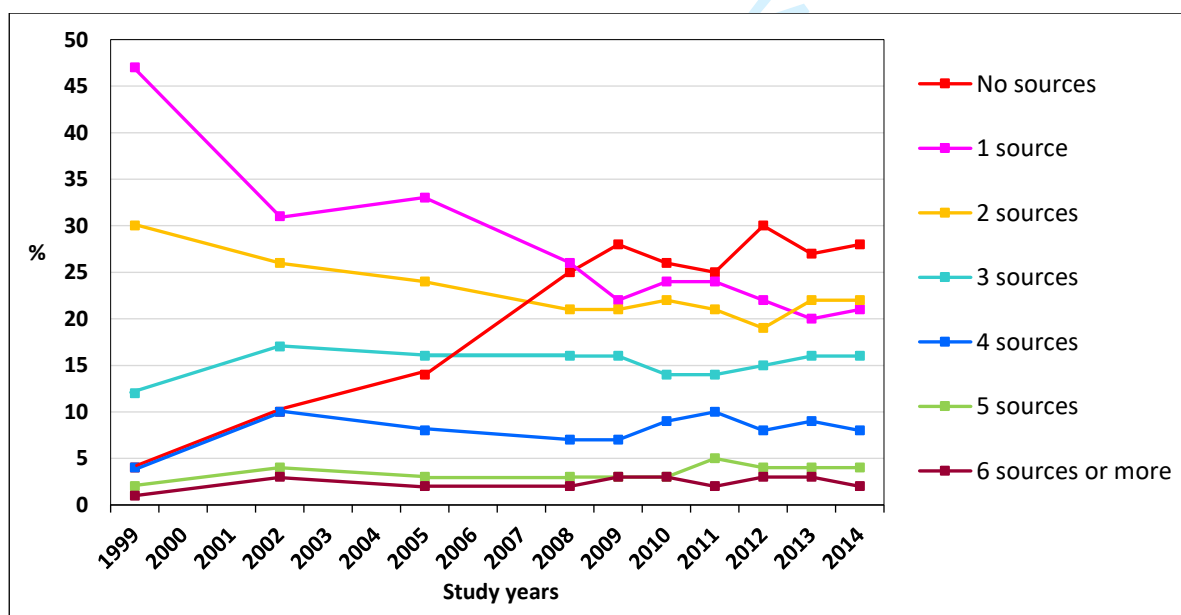

**Fig 2** Number of medicines information sources from which the adult medicine users (n=18862) had received information on the medicines they used. The survey was not conducted in 2000, 2001, 2003, 2004, 2006 and 2007.



1  
2  
3  
4  
5  
6  
7  
8  
9  
10  
11  
12  
13  
14  
15  
16  
17  
18  
19  
20  
21  
22  
23  
24  
25  
26  
27  
28  
29  
30  
31  
32  
33  
34  
35  
36  
37  
38  
39  
40  
41  
42  
43  
44  
45  
46  
47  
48  
49  
50  
51  
52  
53  
54  
55  
56  
57  
58  
59  
60

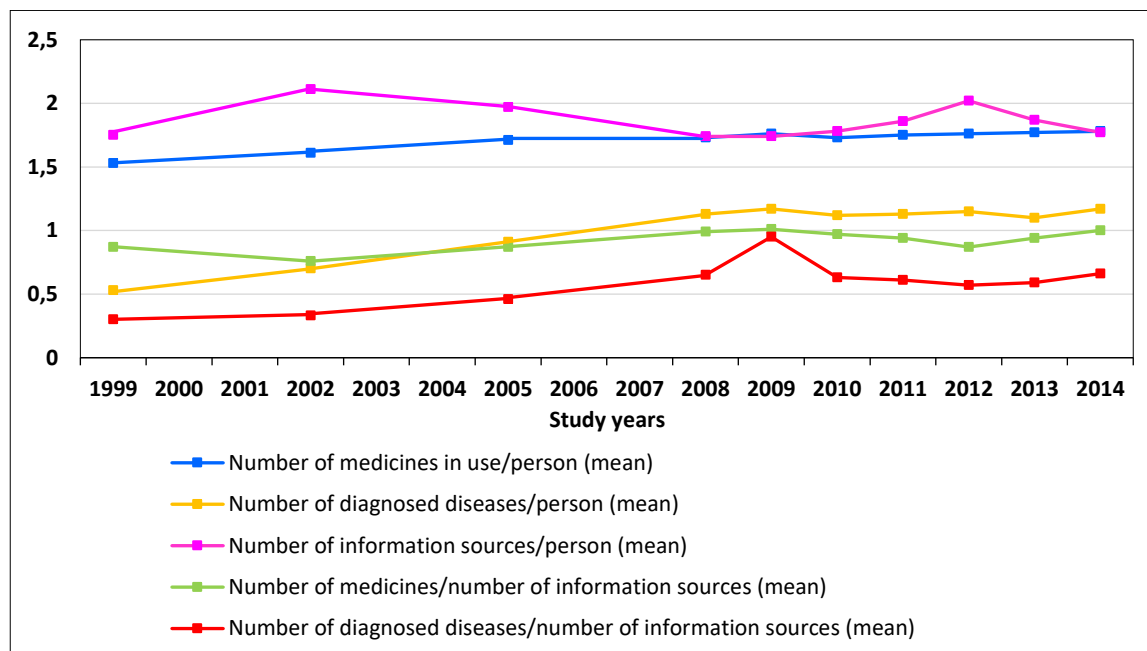

**Fig 3** Ratio between mean number of medicines in use and mean number of diagnosed diseases compared to the mean number of medicines information sources from which the medicine users (n=18862) received medicines information. The survey was not conducted in 2000, 2001, 2003, 2004, 2006 and 2007.

Appendix A. Trends in the receipt of medicines information among medicine users (n=18862) by gender and age. The percentages are calculated from the variables within each subcategory (e.g. gender, age)<sup>a</sup>.

| Characteristics                   | Total <sup>b</sup><br>n (%) | Study year    |               |               |               |               |               |               |               |               |               |
|-----------------------------------|-----------------------------|---------------|---------------|---------------|---------------|---------------|---------------|---------------|---------------|---------------|---------------|
|                                   |                             | 1999<br>n (%) | 2002<br>n (%) | 2005<br>n (%) | 2008<br>n (%) | 2009<br>n (%) | 2010<br>n (%) | 2011<br>n (%) | 2012<br>n (%) | 2013<br>n (%) | 2014<br>n (%) |
| Respondents using medicines       | 18862                       | 1944          | 2000          | 2038          | 2101          | 1957          | 1871          | 1844          | 1759          | 1677          | 1671          |
| Gender <sup>c</sup>               |                             |               |               |               |               |               |               |               |               |               |               |
| Female                            | 11859                       | 1217          | 1278          | 1258          | 1332          | 1235          | 1181          | 1128          | 1101          | 1061          | 1068          |
| Physician                         | 6345 (54)                   | 798 (66)      | 779 (61)      | 738 (59)      | 663 (50)      | 616 (50)      | 596 (50)      | 578 (51)      | 529 (48)      | 537 (51)      | 511 (48)      |
| Community pharmacist              | 5673 (48)                   | 617 (51)      | 616 (48)      | 591 (47)      | 595 (45)      | 548 (44)      | 563 (48)      | 561 (50)      | 523 (48)      | 554 (52)      | 505 (47)      |
| Package leaflet                   | 4332 (41)                   | -             | 615 (48)      | 539 (43)      | 527 (40)      | 494 (40)      | 462 (39)      | 439 (39)      | 411 (37)      | 437 (41)      | 408 (38)      |
| Nurse                             | 1687 (14)                   | 187 (15)      | 183 (14)      | 159 (13)      | 195 (15)      | 173 (14)      | 157 (13)      | 158 (14)      | 168 (15)      | 155 (15)      | 152 (14)      |
| Books/newspapers                  | 1201 (10)                   | 226 (19)      | 198 (15)      | 162 (13)      | 95 (7)        | 92 (7)        | 83 (7)        | 109 (10)      | 74 (7)        | 85 (8)        | 77 (7)        |
| Relatives/friends                 | 1078 (9)                    | 160 (13)      | 143 (11)      | 121 (10)      | 92 (7)        | 113 (9)       | 89 (8)        | 111 (10)      | 82 (7)        | 90 (8)        | 77 (7)        |
| Internet                          | 1500 (13)                   | 19 (2)        | 47 (4)        | 99 (8)        | 178 (13)      | 178 (14)      | 189 (16)      | 195 (17)      | 192 (17)      | 212 (20)      | 191 (18)      |
| Advertisements                    | 621 (5)                     | 123 (10)      | 100 (8)       | 101 (8)       | 42 (3)        | 48 (4)        | 37 (3)        | 60 (5)        | 33 (3)        | 45 (4)        | 32 (3)        |
| Radio/television                  | 496 (4)                     | 71 (6)        | 80 (6)        | 69 (5)        | 35 (3)        | 38 (3)        | 42 (4)        | 62 (5)        | 34 (3)        | 38 (4)        | 27 (3)        |
| Health food stores                | 803 (7)                     | 119 (10)      | 121 (9)       | 108 (9)       | 67 (5)        | 69 (6)        | 64 (5)        | 73 (6)        | 57 (5)        | 68 (6)        | 57 (5)        |
| Telephone services (call centres) | 34 (<1)                     | -             | 4 (<1)        | 5 (<1)        | 4 (<1)        | 7 (<1)        | 1 (<1)        | 3 (<1)        | 3 (<1)        | 3 (<1)        | 4 (<1)        |
| No medicines information sources  | 2190 (18)                   | 33 (3)        | 97 (8)        | 133 (11)      | 309 (23)      | 307 (25)      | 282 (24)      | 234 (21)      | 299 (27)      | 229 (22)      | 267 (25)      |
| Male                              | 7003                        | 722           | 722           | 780           | 769           | 722           | 690           | 716           | 658           | 616           | 603           |
| Physician                         | 3526 (50)                   | 408 (56)      | 407 (56)      | 415 (53)      | 387 (50)      | 334 (46)      | 357 (52)      | 355 (50)      | 310 (47)      | 279 (45)      | 274 (45)      |
| Community pharmacist              | 2684 (38)                   | 275 (37)      | 296 (41)      | 310 (40)      | 266 (35)      | 264 (37)      | 279 (40)      | 264 (37)      | 237 (36)      | 239 (39)      | 254 (42)      |
| Package leaflet                   | 1712 (27)                   | -             | 261 (36)      | 243 (31)      | 218 (28)      | 191 (26)      | 158 (23)      | 179 (25)      | 161 (24)      | 143 (23)      | 158 (26)      |
| Nurse                             | 910 (13)                    | 87 (12)       | 124 (17)      | 95 (12)       | 102 (13)      | 84 (12)       | 86 (12)       | 100 (14)      | 79 (11)       | 77 (13)       | 76 (13)       |
| Books/newspapers                  | 315 (4)                     | 66 (9)        | 49 (7)        | 41 (5)        | 30 (4)        | 20 (3)        | 21 (3)        | 28 (4)        | 20 (3)        | 26 (4)        | 14 (2)        |
| Relatives/friends                 | 507 (7)                     | 109 (15)      | 70 (10)       | 63 (8)        | 35 (5)        | 47 (7)        | 41 (6)        | 34 (5)        | 38 (6)        | 35 (6)        | 35 (6)        |
| Internet                          | 651 (9)                     | 7 (1)         | 21 (3)        | 58 (7)        | 65 (8)        | 65 (9)        | 72 (10)       | 81 (11)       | 75 (11)       | 71 (12)       | 71 (12)       |
| Advertisements                    | 225 (3)                     | 57 (8)        | 35 (5)        | 36 (5)        | 24 (3)        | 9 (1)         | 14 (2)        | 9 (1)         | 17 (3)        | 15 (2)        | 9 (1)         |
| Radio/television                  | 251 (4)                     | 59 (8)        | 47 (7)        | 32 (4)        | 20 (3)        | 12 (2)        | 15 (2)        | 19 (3)        | 9 (1)         | 22 (4)        | 16 (3)        |
| Health food stores                | 186 (3)                     | 22 (3)        | 20 (3)        | 28 (4)        | 21 (3)        | 10 (1)        | 13 (2)        | 17 (2)        | 9 (1)         | 9 (1)         | 9 (1)         |
| Telephone services (call centres) | 4 (<1)                      | -             | 0 (0)         | 0 (0)         | 2 (<1)        | 0 (0)         | 0 (0)         | 1 (<1)        | 0 (0)         | 0 (0)         | 1 (<1)        |
| No medicines information sources  | 1806 (26)                   | 44 (6)        | 99 (14)       | 143 (18)      | 221 (29)      | 246 (34)      | 197 (29)      | 217 (30)      | 224 (34)      | 215 (35)      | 200 (33)      |
| Age group <sup>c</sup> (years)    |                             |               |               |               |               |               |               |               |               |               |               |
| 15-24                             | 2535                        | 314           | 308           | 269           | 270           | 263           | 255           | 231           | 211           | 199           | 215           |
| Physician                         | 1077 (42)                   | 157 (50)      | 154 (50)      | 122 (45)      | 102 (38)      | 96 (37)       | 96 (38)       | 93 (40)       | 88 (42)       | 80 (40)       | 89 (41)       |
| Community pharmacist              | 933 (37)                    | 132 (42)      | 126 (41)      | 93 (35)       | 87 (32)       | 86 (33)       | 88 (35)       | 77 (33)       | 84 (40)       | 76 (38)       | 84 (39)       |
| Package leaflet                   | 911 (45)                    | -             | 183 (59)      | 131 (49)      | 106 (39)      | 98 (38)       | 89 (35)       | 66 (29)       | 80 (38)       | 78 (39)       | 80 (37)       |
| Nurse                             | 522 (21)                    | 65 (21)       | 73 (24)       | 48 (18)       | 54 (20)       | 55 (21)       | 51 (20)       | 44 (19)       | 48 (23)       | 41 (21)       | 43 (20)       |
| Books/newspapers                  | 199 (8)                     | 41 (13)       | 45 (15)       | 26 (10)       | 10 (4)        | 20 (8)        | 8 (3)         | 18 (8)        | 17 (8)        | 6 (3)         | 8 (4)         |
| Relatives/friends                 | 540 (21)                    | 110 (35)      | 76 (25)       | 60 (22)       | 48 (18)       | 52 (20)       | 40 (16)       | 50 (22)       | 40 (19)       | 29 (15)       | 35 (16)       |
| Internet                          | 323 (13)                    | 7 (2)         | 14 (5)        | 23 (9)        | 36 (13)       | 39 (15)       | 36 (14)       | 43 (19)       | 42 (20)       | 41 (21)       | 42 (20)       |
| Advertisements                    | 143 (6)                     | 31 (10)       | 26 (8)        | 30 (11)       | 9 (3)         | 12 (5)        | 9 (4)         | 8 (3)         | 7 (3)         | 5 (3)         | 6 (3)         |
| Radio/television                  | 129 (5)                     | 30 (10)       | 24 (8)        | 21 (8)        | 7 (3)         | 14 (5)        | 7 (3)         | 11 (5)        | 8 (4)         | 4 (2)         | 3 (1)         |
| Health food stores                | 66 (3)                      | 11 (4)        | 12 (4)        | 9 (3)         | 5 (2)         | 1 (<1)        | 4 (2)         | 5 (2)         | 7 (3)         | 7 (4)         | 5 (2)         |
| Telephone services (call centres) | 6 (<1)                      | -             | 3 (1)         | 0 (0)         | 0 (0)         | 1 (<1)        | 0 (0)         | 0 (0)         | 0 (0)         | 1 (1)         | 1 (<1)        |
| No medicines information sources  | 657 (26)                    | 16 (5)        | 37 (12)       | 46 (17)       | 85 (31)       | 94 (36)       | 89 (35)       | 74 (32)       | 75 (36)       | 72 (36)       | 69 (32)       |
| 25-34                             | 2798                        | 331           | 308           | 302           | 305           | 287           | 258           | 277           | 251           | 240           | 239           |
| Physician                         | 1305 (47)                   | 176 (53)      | 152 (46)      | 139 (46)      | 144 (47)      | 136 (48)      | 119 (46)      | 127 (46)      | 108 (43)      | 116 (48)      | 88 (37)       |
| Community pharmacist              | 1333 (48)                   | 183 (55)      | 141 (43)      | 137 (45)      | 140 (46)      | 122 (43)      | 126 (49)      | 136 (49)      | 116 (46)      | 115 (48)      | 117 (49)      |
| Package leaflet                   | 1024 (42)                   | -             | 160 (48)      | 132 (44)      | 129 (42)      | 119 (42)      | 100 (39)      | 107 (39)      | 101 (40)      | 89 (37)       | 87 (36)       |

1

2

3

4

5

6

7

8

9

10

11

12

13

14

15

16

17

18

19

20

21

22

23

24

25

26

27

28

29

30

31

32

33

34

35

36

37

38

39

40

41

42

43

44

45

46

47

|  |                                   |           |          |          |          |          |          |          |          |          |          |          |
|--|-----------------------------------|-----------|----------|----------|----------|----------|----------|----------|----------|----------|----------|----------|
|  | Nurse                             | 470 (17)  | 59 (17)  | 48 (15)  | 41 (14)  | 42 (14)  | 40 (14)  | 32 (12)  | 36 (13)  | 32 (13)  | 42 (18)  | 30 (13)  |
|  | Books/newspapers                  | 191 (7)   | 47 (14)  | 34 (10)  | 29 (10)  | 14 (5)   | 12 (4)   | 10 (4)   | 12 (4)   | 11 (4)   | 9 (4)    | 13 (5)   |
|  | Relatives/friends                 | 329 (12)  | 57 (17)  | 38 (11)  | 51 (17)  | 23 (8)   | 28 (10)  | 25 (10)  | 38 (14)  | 17 (7)   | 33 (14)  | 19 (8)   |
|  | Internet                          | 415 (15)  | 5 (2)    | 20 (6)   | 31 (10)  | 45 (15)  | 52 (18)  | 49 (19)  | 56 (20)  | 48 (19)  | 60 (25)  | 49 (21)  |
|  | Advertisements                    | 137 (5)   | 31 (9)   | 29 (9)   | 28 (9)   | 8 (3)    | 8 (3)    | 9 (3)    | 7 (3)    | 6 (2)    | 6 (3)    | 5 (2)    |
|  | Radio/television                  | 117 (4)   | 31 (9)   | 23 (7)   | 23 (8)   | 4 (1)    | 9 (3)    | 8 (3)    | 5 (2)    | 5 (2)    | 3 (1)    | 6 (3)    |
|  | Health food stores                | 141 (5)   | 16 (5)   | 16 (5)   | 28 (9)   | 12 (4)   | 13 (5)   | 6 (2)    | 10 (4)   | 9 (4)    | 13 (5)   | 8 (3)    |
|  | Telephone services (call centres) | 13 (1)    | -        | 0 (0)    | 3 (1)    | 1 (<1)   | 1 (<1)   | 0 (0)    | 1 (<1)   | 2 (1)    | 1 (<1)   | 4 (2)    |
|  | No medicines information sources  | 736 (26)  | 15 (5)   | 35 (11)  | 54 (18)  | 85 (28)  | 95 (33)  | 74 (29)  | 89 (32)  | 84 (33)  | 67 (28)  | 78 (32)  |
|  | 35-44                             | 3409      | 419      | 411      | 394      | 376      | 335      | 304      | 318      | 292      | 275      | 285      |
|  | Physician                         | 1609 (47) | 220 (55) | 221 (54) | 200 (51) | 164 (44) | 146 (44) | 145 (48) | 145 (46) | 127 (43) | 121 (44) | 120 (42) |
|  | Community pharmacist              | 1568 (46) | 230 (55) | 213 (52) | 183 (47) | 165 (44) | 132 (39) | 141 (47) | 130 (41) | 119 (41) | 134 (49) | 121 (43) |
|  | Package leaflet                   | 1130 (38) | -        | 182 (44) | 181 (46) | 141 (38) | 122 (37) | 96 (32)  | 112 (35) | 105 (36) | 105 (38) | 86 (30)  |
|  | Nurse                             | 380 (11)  | 40 (10)  | 46 (11)  | 41 (10)  | 46 (12)  | 44 (13)  | 29 (10)  | 34 (11)  | 37 (13)  | 26 (9)   | 37 (13)  |
|  | Books/newspapers                  | 274 (8)   | 77 (18)  | 57 (14)  | 33 (8)   | 24 (6)   | 16 (5)   | 12 (4)   | 19 (6)   | 10 (3)   | 14 (5)   | 12 (4)   |
|  | Relatives/friends                 | 239 (7)   | 37 (9)   | 35 (9)   | 24 (6)   | 29 (8)   | 25 (7)   | 21 (7)   | 15 (5)   | 21 (7)   | 16 (6)   | 16 (6)   |
|  | Internet                          | 381 (11)  | 9 (2)    | 17 (4)   | 43 (11)  | 54 (14)  | 44 (13)  | 45 (15)  | 42 (13)  | 37 (13)  | 54 (20)  | 36 (13)  |
|  | Advertisements                    | 188 (6)   | 61 (15)  | 33 (8)   | 26 (7)   | 18 (5)   | 6 (2)    | 7 (2)    | 7 (2)    | 9 (3)    | 7 (3)    | 14 (5)   |
|  | Radio/television                  | 134 (4)   | 34 (8)   | 31 (8)   | 13 (3)   | 11 (3)   | 3 (1)    | 7 (2)    | 12 (4)   | 6 (2)    | 9 (3)    | 8 (3)    |
|  | Health food stores                | 196 (6)   | 41 (10)  | 39 (9)   | 25 (6)   | 19 (5)   | 10 (3)   | 15 (5)   | 13 (4)   | 13 (4)   | 12 (4)   | 9 (3)    |
|  | Telephone services (call centres) | 9 (<1)    | -        | 1 (<1)   | 0 (0)    | 3 (1)    | 2 (1)    | 0 (0)    | 2 (<1)   | 1 (<1)   | 0 (0)    | 0 (0)    |
|  | No medicines information sources  | 893 (26)  | 19 (5)   | 45 (11)  | 60 (15)  | 106 (28) | 103 (31) | 94 (31)  | 97 (31)  | 97 (33)  | 85 (31)  | 97 (34)  |
|  | 45-54                             | 4558      | 481      | 486      | 491      | 490      | 460      | 484      | 438      | 430      | 411      | 387      |
|  | Physician                         | 2539 (56) | 342 (71) | 314 (65) | 297 (60) | 275 (56) | 232 (50) | 237 (49) | 229 (52) | 210 (49) | 200 (49) | 203 (52) |
|  | Community pharmacist              | 2101 (46) | 210 (44) | 218 (45) | 227 (46) | 201 (41) | 203 (44) | 231 (48) | 216 (49) | 196 (46) | 196 (48) | 187 (48) |
|  | Package leaflet                   | 1453 (36) | -        | 185 (38) | 181 (37) | 176 (36) | 169 (37) | 163 (34) | 160 (37) | 136 (32) | 145 (35) | 138 (36) |
|  | Nurse                             | 544 (12)  | 59 (12)  | 65 (13)  | 53 (11)  | 72 (15)  | 47 (10)  | 46 (10)  | 59 (13)  | 48 (11)  | 53 (13)  | 42 (11)  |
|  | Books/newspapers                  | 410 (9)   | 81 (17)  | 60 (12)  | 57 (12)  | 40 (8)   | 32 (7)   | 32 (5)   | 38 (9)   | 20 (5)   | 33 (8)   | 17 (4)   |
|  | Relatives/friends                 | 236 (5)   | 37 (8)   | 31 (6)   | 21 (4)   | 18 (4)   | 31 (7)   | 24 (5)   | 18 (4)   | 20 (5)   | 21 (5)   | 15 (4)   |
|  | Internet                          | 481 (11)  | 3 (1)    | 12 (2)   | 38 (8)   | 61 (12)  | 58 (13)  | 63 (13)  | 68 (16)  | 58 (13)  | 60 (15)  | 60 (16)  |
|  | Advertisements                    | 199 (4)   | 32 (7)   | 31 (6)   | 30 (6)   | 17 (3)   | 16 (3)   | 15 (3)   | 20 (5)   | 14 (3)   | 18 (4)   | 6 (2)    |
|  | Radio/television                  | 156 (3)   | 22 (5)   | 26 (5)   | 15 (3)   | 17 (3)   | 13 (3)   | 10 (2)   | 17 (4)   | 10 (2)   | 20 (5)   | 6 (2)    |
|  | Health food stores                | 251 (6)   | 43 (9)   | 38 (8)   | 29 (6)   | 10 (2)   | 28 (6)   | 22 (5)   | 32 (7)   | 13 (3)   | 20 (5)   | 16 (4)   |
|  | Telephone services (call centres) | 5 (<1)    | -        | 0 (0)    | 0 (0)    | 1 (<1)   | 2 (<1)   | 1 (<1)   | 0 (0)    | 0 (0)    | 1 (<1)   | 0 (0)    |
|  | No medicines information sources  | 932 (20)  | 15 (3)   | 40 (8)   | 56 (11)  | 107 (22) | 107 (23) | 120 (25) | 97 (22)  | 125 (29) | 104 (25) | 100 (26) |
|  | 55-64                             | 5562      | 399      | 487      | 582      | 660      | 612      | 570      | 580      | 575      | 552      | 545      |
|  | Physician                         | 3341 (60) | 311 (78) | 345 (71) | 395 (68) | 365 (55) | 340 (56) | 356 (62) | 339 (58) | 306 (53) | 299 (54) | 285 (52) |
|  | Community pharmacist              | 2438 (44) | 137 (34) | 214 (44) | 261 (45) | 268 (41) | 269 (44) | 256 (45) | 266 (46) | 245 (43) | 272 (49) | 250 (46) |
|  | Package leaflet                   | 1526 (30) | -        | 166 (34) | 157 (27) | 193 (29) | 177 (29) | 172 (30) | 173 (30) | 150 (26) | 163 (30) | 175 (32) |
|  | Nurse                             | 749 (13)  | 51 (13)  | 75 (15)  | 71 (12)  | 83 (13)  | 71 (12)  | 85 (15)  | 85 (15)  | 82 (14)  | 70 (13)  | 76 (14)  |
|  | Books/newspapers                  | 442 (8)   | 46 (12)  | 51 (10)  | 58 (10)  | 37 (6)   | 32 (5)   | 42 (7)   | 50 (9)   | 36 (6)   | 49 (9)   | 41 (8)   |
|  | Relatives/friends                 | 241 (4)   | 28 (7)   | 33 (7)   | 28 (5)   | 9 (1)    | 24 (4)   | 20 (4)   | 24 (4)   | 22 (4)   | 26 (5)   | 27 (5)   |
|  | Internet                          | 449 (8)   | 2 (1)    | 5 (1)    | 22 (4)   | 47 (7)   | 50 (8)   | 68 (12)  | 67 (12)  | 82 (14)  | 68 (12)  | 75 (14)  |
|  | Advertisements                    | 180 (3)   | 25 (6)   | 16 (3)   | 23 (4)   | 14 (7)   | 15 (2)   | 12 (2)   | 27 (5)   | 14 (2)   | 24 (4)   | 10 (2)   |
|  | Radio/television                  | 211 (4)   | 13 (3)   | 23 (5)   | 29 (5)   | 16 (2)   | 11 (2)   | 25 (4)   | 36 (6)   | 14 (2)   | 24 (4)   | 20 (4)   |
|  | Health food stores                | 329 (6)   | 30 (8)   | 36 (7)   | 45 (8)   | 42 (6)   | 27 (4)   | 30 (5)   | 42 (6)   | 24 (4)   | 25 (5)   | 28 (5)   |
|  | Telephone services (call centres) | 5 (<1)    | -        | 0 (0)    | 2 (<1)   | 1 (1)    | 1 (1)    | 0 (0)    | 1 (<1)   | 0 (0)    | 0 (0)    | 0 (0)    |
|  | No medicines information sources  | 1072 (19) | 12 (3)   | 39 (8)   | 60 (10)  | 147 (22) | 154 (25) | 102 (18) | 155 (27) | 142 (25) | 116 (21) | 123 (23) |

<sup>a</sup>Discrepancies in totals are due to rounding errors, <sup>b</sup>Calculated from study years available, <sup>c</sup>Percentages have been calculated for the respondents of each year who reported using medicines (list in survey) during the last week (7 days).

Appendix B. Trends in the receipt of medicines information among medicine users (n=18862) by number of medicines in use and number of diagnosed diseases. The percentages are calculated from the variables within each subcategory (e.g. number of medicines in use, number of diagnosed diseases)<sup>a</sup>.

| Characteristics                                | Total <sup>b</sup><br>n (%) | Study year    |               |               |               |               |               |               |               |               |               |
|------------------------------------------------|-----------------------------|---------------|---------------|---------------|---------------|---------------|---------------|---------------|---------------|---------------|---------------|
|                                                |                             | 1999<br>n (%) | 2002<br>n (%) | 2005<br>n (%) | 2008<br>n (%) | 2009<br>n (%) | 2010<br>n (%) | 2011<br>n (%) | 2012<br>n (%) | 2013<br>n (%) | 2014<br>n (%) |
| Respondents using medicines                    | 18862                       | 1944          | 2000          | 2038          | 2101          | 1957          | 1871          | 1844          | 1759          | 1677          | 1671          |
| Number of medicines in use/person <sup>c</sup> |                             |               |               |               |               |               |               |               |               |               |               |
| 1 medicine                                     | 10558                       | 1215          | 1183          | 1143          | 1154          | 1060          | 1029          | 1011          | 946           | 907           | 910           |
| Physician                                      | 4449 (42)                   | 628 (52)      | 559 (47)      | 508 (44)      | 465 (40)      | 410 (39)      | 414 (40)      | 410 (41)      | 344 (36)      | 366 (40)      | 345 (38)      |
| Community pharmacist                           | 3992 (38)                   | 540 (44)      | 461 (39)      | 408 (36)      | 405 (35)      | 369 (35)      | 386 (38)      | 375 (37)      | 333 (35)      | 368 (41)      | 347 (38)      |
| Package leaflet                                | 2952 (32)                   | -             | 478 (40)      | 401 (35)      | 354 (31)      | 317 (30)      | 293 (28)      | 312 (31)      | 261 (28)      | 278 (31)      | 258 (28)      |
| Nurse                                          | 1056 (10)                   | 138 (11)      | 124 (10)      | 104 (9)       | 129 (11)      | 103 (10)      | 84 (8)        | 104 (10)      | 90 (10)       | 92 (10)       | 88 (10)       |
| Books/newspapers                               | 719 (7)                     | 184 (15)      | 124 (10)      | 92 (8)        | 48 (4)        | 43 (4)        | 43 (4)        | 62 (6)        | 39 (4)        | 45 (5)        | 39 (4)        |
| Relatives/friends                              | 823 (8)                     | 168 (14)      | 113 (10)      | 94 (8)        | 70 (6)        | 76 (7)        | 64 (6)        | 78 (8)        | 55 (6)        | 56 (6)        | 48 (5)        |
| Internet                                       | 887 (8)                     | 10 (1)        | 37 (3)        | 78 (7)        | 99 (9)        | 90 (8)        | 114 (11)      | 120 (12)      | 105 (11)      | 117 (13)      | 117 (13)      |
| Advertisements                                 | 497 (5)                     | 127 (10)      | 86 (7)        | 74 (6)        | 38 (3)        | 28 (3)        | 29 (3)        | 36 (4)        | 26 (3)        | 27 (3)        | 26 (3)        |
| Radio/television                               | 373 (4)                     | 88 (7)        | 67 (6)        | 48 (4)        | 26 (2)        | 20 (2)        | 30 (3)        | 37 (4)        | 16 (2)        | 27 (3)        | 14 (2)        |
| Health food stores                             | 477 (5)                     | 77 (6)        | 71 (6)        | 60 (5)        | 36 (3)        | 41 (4)        | 44 (4)        | 46 (5)        | 28 (3)        | 39 (4)        | 35 (4)        |
| Telephone services (call centres)              | 20 (<1)                     | -             | 4 (<1)        | 2 (<1)        | 3 (<1)        | 3 (<1)        | 1 (<1)        | 2 (<1)        | 2 (<1)        | 0 (0)         | 3 (<1)        |
| No medicines information sources               | 2851 (27)                   | 68 (6)        | 164 (14)      | 219 (19)      | 386 (33)      | 379 (36)      | 338 (33)      | 322 (32)      | 363 (38)      | 292 (32)      | 320 (35)      |
| 2 medicines                                    | 5116                        | 505           | 559           | 566           | 584           | 536           | 512           | 491           | 492           | 442           | 429           |
| Physician                                      | 3107 (61)                   | 386 (76)      | 396 (71)      | 371 (66)      | 336 (58)      | 297 (55)      | 299 (58)      | 278 (57)      | 284 (58)      | 236 (53)      | 224 (52)      |
| Community pharmacist                           | 2482 (49)                   | 237 (47)      | 299 (53)      | 290 (51)      | 256 (44)      | 235 (44)      | 247 (48)      | 245 (50)      | 238 (48)      | 224 (51)      | 211 (49)      |
| Package leaflet                                | 1769 (38)                   | -             | 270 (48)      | 225 (40)      | 231 (40)      | 205 (38)      | 189 (37)      | 168 (34)      | 172 (35)      | 158 (36)      | 151 (35)      |
| Nurse                                          | 794 (16)                    | 94 (19)       | 117 (21)      | 84 (15)       | 90 (15)       | 72 (13)       | 68 (13)       | 72 (15)       | 76 (15)       | 59 (13)       | 62 (14)       |
| Books/newspapers                               | 468 (9)                     | 73 (14)       | 83 (15)       | 62 (11)       | 39 (7)        | 38 (7)        | 31 (6)        | 35 (7)        | 30 (6)        | 45 (5)        | 32 (7)        |
| Relatives/friends                              | 488 (10)                    | 75 (15)       | 66 (12)       | 62 (11)       | 38 (7)        | 54 (10)       | 45 (9)        | 42 (9)        | 39 (8)        | 38 (9)        | 29 (7)        |
| Internet                                       | 671 (13)                    | 7 (1)         | 25 (4)        | 46 (8)        | 85 (15)       | 81 (15)       | 81 (16)       | 83 (17)       | 90 (18)       | 90 (20)       | 83 (19)       |
| Advertisements                                 | 224 (4)                     | 40 (8)        | 34 (6)        | 43 (8)        | 17 (3)        | 17 (3)        | 14 (3)        | 16 (3)        | 14 (3)        | 19 (4)        | 10 (2)        |
| Radio/television                               | 201 (4)                     | 23 (5)        | 37 (7)        | 28 (5)        | 16 (3)        | 17 (3)        | 16 (3)        | 21 (4)        | 16 (3)        | 16 (4)        | 11 (3)        |
| Health food stores                             | 297 (6)                     | 38 (8)        | 48 (9)        | 51 (9)        | 31 (5)        | 18 (3)        | 22 (4)        | 27 (5)        | 23 (5)        | 22 (5)        | 17 (4)        |
| Telephone services (call centres)              | 10 (<1)                     | -             | 0 (0)         | 1 (<1)        | 2 (<1)        | 2 (<1)        | 0 (0)         | 1 (<1)        | 1 (<1)        | 2 (<1)        | 1 (<1)        |
| No medicines information sources               | 801 (16)                    | 5 (1)         | 25 (4)        | 47 (8)        | 105 (18)      | 122 (23)      | 101 (20)      | 83 (17)       | 111 (23)      | 99 (22)       | 103 (24)      |
| 3 medicines                                    | 1984                        | 161           | 166           | 198           | 221           | 220           | 210           | 210           | 191           | 208           | 199           |
| Physician                                      | 1388 (70)                   | 133 (83)      | 139 (84)      | 158 (80)      | 147 (67)      | 140 (64)      | 149 (71)      | 150 (71)      | 116 (61)      | 134 (64)      | 122 (61)      |
| Community pharmacist                           | 1101 (55)                   | 76 (47)       | 94 (57)       | 112 (57)      | 111 (50)      | 118 (54)      | 130 (62)      | 110 (52)      | 106 (55)      | 127 (61)      | 117 (59)      |
| Package leaflet                                | 797 (44)                    | -             | 83 (50)       | 88 (44)       | 97 (44)       | 90 (41)       | 87 (41)       | 80 (38)       | 77 (40)       | 100 (48)      | 95 (48)       |
| Nurse                                          | 413 (21)                    | 28 (17)       | 41 (25)       | 33 (17)       | 37 (17)       | 45 (20)       | 57 (27)       | 44 (21)       | 40 (21)       | 42 (20)       | 46 (23)       |
| Books/newspapers                               | 197 (10)                    | 25 (16)       | 22 (13)       | 24 (12)       | 20 (9)        | 13 (6)        | 20 (10)       | 21 (10)       | 17 (9)        | 23 (11)       | 12 (6)        |
| Relatives/friends                              | 165 (8)                     | 14 (9)        | 26 (16)       | 15 (8)        | 10 (5)        | 10 (5)        | 16 (8)        | 14 (7)        | 20 (10)       | 19 (9)        | 21 (11)       |
| Internet                                       | 311 (16)                    | 6 (4)         | 4 (2)         | 23 (12)       | 37 (17)       | 37 (17)       | 42 (20)       | 44 (21)       | 38 (20)       | 47 (23)       | 33 (17)       |
| Advertisements                                 | 78 (4)                      | 8 (5)         | 13 (8)        | 12 (6)        | 5 (2)         | 5 (2)         | 6 (3)         | 11 (5)        | 6 (3)         | 9 (4)         | 3 (2)         |
| Radio/television                               | 93 (5)                      | 13 (8)        | 17 (10)       | 9 (5)         | 5 (2)         | 5 (2)         | 9 (4)         | 13 (6)        | 5 (3)         | 11 (5)        | 6 (3)         |
| Health food stores                             | 103 (5)                     | 19 (12)       | 11 (7)        | 12 (6)        | 8 (4)         | 12 (5)        | 7 (3)         | 8 (4)         | 7 (4)         | 10 (5)        | 9 (5)         |
| Telephone services (call centres)              | 4 (<1)                      | -             | 0 (0)         | 1 (1)         | 1 (<1)        | 0 (0)         | 0 (0)         | 1 (<1)        | 0 (0)         | 1 (<1)        | 0 (0)         |
| No medicines information sources               | 238 (12)                    | 4 (2)         | 4 (2)         | 9 (5)         | 28 (13)       | 39 (18)       | 26 (12)       | 33 (16)       | 34 (18)       | 36 (17)       | 25 (13)       |
| 4 medicines or more                            | 1206                        | 63            | 92            | 131           | 142           | 141           | 120           | 132           | 130           | 120           | 133           |
| Physician                                      | 913 (76)                    | 59 (94)       | 78 (85)       | 116 (89)      | 102 (72)      | 103 (73)      | 91 (76)       | 95 (72)       | 95 (72)       | 80 (67)       | 94 (71)       |
| Community pharmacist                           | 780 (65)                    | 39 (62)       | 58 (63)       | 91 (69)       | 89 (63)       | 90 (64)       | 79 (66)       | 95 (72)       | 83 (63)       | 72 (60)       | 84 (63)       |
| Package leaflet                                | 526 (44)                    | -             | 45 (39)       | 68 (52)       | 63 (44)       | 73 (52)       | 51 (43)       | 58 (44)       | 62 (48)       | 44 (37)       | 62 (47)       |
| Nurse                                          | 334 (28)                    | 14 (22)       | 25 (27)       | 33 (25)       | 41 (29)       | 37 (26)       | 34 (28)       | 38 (29)       | 41 (32)       | 39 (33)       | 32 (24)       |

1  
2  
3  
4  
5  
6  
7  
8  
9  
10  
11  
12  
13  
14  
15  
16  
17  
18  
19  
20  
21  
22  
23  
24  
25  
26  
27  
28  
29  
30  
31  
32  
33  
34  
35  
36  
37  
38  
39  
40  
41  
42  
43  
44  
45  
46  
47

|                                                    |           |          |          |          |          |          |          |          |          |          |          |
|----------------------------------------------------|-----------|----------|----------|----------|----------|----------|----------|----------|----------|----------|----------|
| Books/newspapers                                   | 148 (12)  | 10 (16)  | 18 (20)  | 25 (19)  | 18 (13)  | 18 (13)  | 10 (8)   | 19 (14)  | 8 (6)    | 14 (12)  | 8 (6)    |
| Relatives/friends                                  | 110 (9)   | 12 (19)  | 8 (9)    | 13 (10)  | 9 (6)    | 20 (14)  | 5 (4)    | 11 (8)   | 6 (5)    | 12 (10)  | 14 (11)  |
| Internet                                           | 217 (18)  | 3 (5)    | 2 (2)    | 10 (8)   | 22 (15)  | 35 (25)  | 24 (20)  | 29 (22)  | 34 (26)  | 29 (24)  | 29 (22)  |
| Advertisements                                     | 47 (4)    | 5 (8)    | 2 (2)    | 8 (6)    | 6 (4)    | 7 (5)    | 2 (2)    | 6 (5)    | 4 (3)    | 5 (4)    | 2 (2)    |
| Radio/television                                   | 80 (7)    | 6 (10)   | 6 (7)    | 16 (12)  | 8 (6)    | 8 (6)    | 2 (2)    | 10 (8)   | 6 (5)    | 6 (5)    | 12 (9)   |
| Health food stores                                 | 84 (7)    | 7 (11)   | 11 (12)  | 13 (10)  | 13 (9)   | 8 (6)    | 4 (3)    | 9 (7)    | 8 (6)    | 6 (5)    | 5 (4)    |
| Telephone services (call centres)                  | 4 (<1)    | -        | 0 (0)    | 1 (1)    | 0 (0)    | 2 (1)    | 0 (0)    | 0 (0)    | 0 (0)    | 0 (0)    | 1 (1)    |
| No medicines information sources                   | 106 (9)   | 0 (0)    | 3 (5)    | 1 (1)    | 11 (8)   | 13 (9)   | 14 (12)  | 13 (10)  | 15 (12)  | 17 (14)  | 19 (14)  |
| Number of diagnosed diseases/person <sup>c,d</sup> |           |          |          |          |          |          |          |          |          |          |          |
| None                                               | 8660      | 1228     | 1121     | 971      | 864      | 787      | 811      | 754      | 712      | 723      | 689      |
| Physician                                          | 3418 (39) | 633 (52) | 536 (48) | 384 (40) | 286 (33) | 273 (35) | 300 (37) | 272 (36) | 249 (35) | 268 (36) | 217 (31) |
| Community pharmacist                               | 3277 (38) | 558 (45) | 470 (42) | 371 (38) | 299 (35) | 258 (33) | 293 (36) | 267 (35) | 250 (35) | 275 (38) | 236 (34) |
| Package leaflet                                    | 2538 (34) | -        | 496 (44) | 387 (40) | 282 (33) | 251 (32) | 246 (30) | 237 (31) | 202 (28) | 230 (32) | 207 (30) |
| Nurse                                              | 909 (10)  | 157 (13) | 146 (13) | 91 (9)   | 88 (10)  | 67 (9)   | 80 (10)  | 71 (9)   | 70 (10)  | 75 (10)  | 64 (9)   |
| Books/newspapers                                   | 698 (8)   | 194 (16) | 134 (12) | 95 (10)  | 42 (5)   | 35 (4)   | 39 (5)   | 50 (7)   | 34 (5)   | 38 (5)   | 37 (5)   |
| Relatives/friends                                  | 851 (10)  | 196 (16) | 135 (12) | 117 (12) | 55 (6)   | 66 (8)   | 66 (8)   | 71 (9)   | 55 (8)   | 50 (7)   | 40 (6)   |
| Internet                                           | 744 (9)   | 15 (1)   | 38 (3)   | 65 (7)   | 77 (9)   | 71 (9)   | 99 (12)  | 93 (12)  | 84 (12)  | 109 (15) | 93 (13)  |
| Advertisements                                     | 488 (6)   | 141 (12) | 88 (8)   | 81 (8)   | 35 (4)   | 21 (3)   | 25 (3)   | 30 (4)   | 19 (3)   | 24 (3)   | 24 (3)   |
| Radio/television                                   | 358 (4)   | 96 (8)   | 65 (6)   | 52 (5)   | 20 (2)   | 18 (2)   | 21 (3)   | 33 (4)   | 12 (2)   | 23 (3)   | 18 (3)   |
| Health food stores                                 | 446 (5)   | 85 (7)   | 84 (8)   | 72 (7)   | 37 (4)   | 22 (3)   | 34 (4)   | 31 (4)   | 17 (2)   | 35 (5)   | 29 (4)   |
| Telephone services (call centres)                  | 20 (<1)   | -        | 3 (<1)   | 4 (<1)   | 2 (<1)   | 2 (<1)   | 0 (0)    | 2 (<1)   | 2 (<1)   | 2 (<1)   | 3 (<1)   |
| No medicines information sources                   | 2337 (27) | 65 (5)   | 155 (14) | 187 (19) | 311 (36) | 295 (37) | 272 (34) | 254 (34) | 283 (40) | 251 (35) | 264 (38) |
| 1 disease                                          | 5262      | 502      | 527      | 593      | 616      | 557      | 492      | 539      | 521      | 465      | 450      |
| Physician                                          | 3055 (58) | 389 (77) | 364 (69) | 394 (66) | 348 (57) | 290 (52) | 261 (53) | 276 (51) | 251 (48) | 245 (53) | 237 (53) |
| Community pharmacist                               | 2342 (45) | 224 (45) | 259 (49) | 260 (44) | 241 (39) | 231 (42) | 221 (45) | 245 (45) | 218 (42) | 231 (50) | 212 (47) |
| Package leaflet                                    | 1620 (34) | -        | 228 (43) | 202 (34) | 205 (33) | 197 (35) | 156 (32) | 168 (31) | 156 (30) | 169 (36) | 139 (31) |
| Nurse                                              | 699 (13)  | 70 (14)  | 81 (15)  | 68 (12)  | 90 (15)  | 84 (15)  | 53 (11)  | 68 (13)  | 69 (13)  | 57 (12)  | 59 (13)  |
| Books/newspapers                                   | 410 (8)   | 75 (15)  | 66 (13)  | 54 (9)   | 33 (5)   | 34 (6)   | 25 (5)   | 41 (8)   | 27 (5)   | 36 (8)   | 19 (4)   |
| Relatives/friends                                  | 386 (7)   | 53 (11)  | 56 (11)  | 32 (5)   | 37 (6)   | 46 (8)   | 36 (7)   | 38 (7)   | 30 (6)   | 34 (7)   | 24 (5)   |
| Internet                                           | 591 (11)  | 8 (2)    | 19 (4)   | 49 (8)   | 78 (13)  | 68 (12)  | 67 (14)  | 68 (13)  | 73 (14)  | 95 (20)  | 66 (15)  |
| Advertisements                                     | 200 (4)   | 32 (6)   | 30 (6)   | 35 (6)   | 11 (2)   | 18 (3)   | 13 (3)   | 16 (3)   | 14 (3)   | 20 (4)   | 11 (2)   |
| Radio/television                                   | 190 (4)   | 22 (4)   | 42 (8)   | 24 (4)   | 12 (2)   | 11 (2)   | 16 (3)   | 18 (3)   | 18 (3)   | 20 (4)   | 7 (2)    |
| Health food stores                                 | 268 (5)   | 44 (9)   | 36 (7)   | 30 (5)   | 18 (3)   | 28 (5)   | 17 (3)   | 28 (5)   | 25 (5)   | 23 (5)   | 19 (4)   |
| Telephone services (call centres)                  | 8 (<1)    | -        | 0 (0)    | 0 (0)    | 2 (<1)   | 2 (<1)   | 1 (<1)   | 0 (0)    | 1 (<1)   | 1 (<1)   | 1 (<1)   |
| No medicines information sources                   | 1010 (19) | 11 (2)   | 26 (5)   | 65 (11)  | 138 (22) | 153 (27) | 124 (25) | 118 (22) | 153 (29) | 110 (24) | 112 (25) |
| 2 diseases                                         | 2900      | 151      | 232      | 270      | 368      | 350      | 331      | 337      | 296      | 280      | 285      |
| Physician                                          | 1930 (67) | 126 (83) | 183 (79) | 203 (75) | 240 (65) | 208 (59) | 224 (68) | 229 (68) | 193 (64) | 161 (58) | 163 (57) |
| Community pharmacist                               | 1506 (52) | 79 (52)  | 116 (50) | 140 (52) | 179 (49) | 172 (49) | 179 (54) | 177 (53) | 156 (53) | 152 (54) | 156 (55) |
| Package leaflet                                    | 1033 (36) | -        | 98 (42)  | 98 (36)  | 142 (39) | 131 (37) | 120 (36) | 120 (36) | 118 (40) | 98 (35)  | 108 (38) |
| Nurse                                              | 470 (16)  | 34 (23)  | 43 (19)  | 39 (14)  | 50 (14)  | 52 (15)  | 52 (16)  | 59 (18)  | 50 (17)  | 55 (20)  | 36 (13)  |
| Books/newspapers                                   | 202 (7)   | 11 (7)   | 28 (12)  | 24 (9)   | 25 (7)   | 23 (7)   | 20 (6)   | 16 (5)   | 21 (7)   | 17 (6)   | 17 (6)   |
| Relatives/friends                                  | 208 (7)   | 11 (7)   | 18 (8)   | 18 (7)   | 23 (6)   | 26 (7)   | 13 (4)   | 23 (7)   | 20 (7)   | 27 (10)  | 29 (10)  |
| Internet                                           | 417 (14)  | 1 (1)    | 9 (4)    | 28 (10)  | 56 (15)  | 57 (16)  | 48 (15)  | 67 (20)  | 64 (22)  | 40 (14)  | 47 (16)  |
| Advertisements                                     | 85 (3)    | 3 (2)    | 12 (5)   | 10 (4)   | 8 (2)    | 7 (2)    | 7 (2)    | 13 (4)   | 11 (4)   | 10 (4)   | 4 (1)    |
| Radio/television                                   | 96 (3)    | 7 (5)    | 11 (5)   | 7 (3)    | 9 (2)    | 9 (3)    | 10 (3)   | 16 (5)   | 9 (3)    | 11 (4)   | 7 (2)    |
| Health food stores                                 | 140 (5)   | 5 (3)    | 15 (7)   | 15 (6)   | 18 (5)   | 21 (6)   | 13 (4)   | 20 (6)   | 16 (5)   | 9 (3)    | 8 (3)    |
| Telephone services (call centres)                  | 3 (<1)    | -        | 1 (<1)   | 0 (0)    | 0 (0)    | 0 (0)    | 0 (0)    | 2 (1)    | 0 (0)    | 0 (0)    | 0 (0)    |
| No medicines information sources                   | 430 (15)  | 1 (1)    | 10 (4)   | 19 (7)   | 58 (16)  | 71 (20)  | 55 (17)  | 53 (16)  | 48 (16)  | 57 (20)  | 58 (20)  |
| 3 diseases or more                                 | 2040      | 63       | 120      | 204      | 253      | 263      | 237      | 214      | 230      | 209      | 247      |
| Physician                                          | 1473 (72) | 58 (92)  | 103 (86) | 172 (84) | 176 (70) | 179 (68) | 168 (71) | 156 (73) | 151 (66) | 142 (68) | 168 (68) |
| Community pharmacist                               | 1232 (60) | 31 (49)  | 67 (56)  | 130 (64) | 142 (56) | 151 (57) | 149 (63) | 136 (64) | 135 (59) | 135 (65) | 155 (63) |
| Package leaflet                                    | 853 (43)  | -        | 54 (45)  | 95 (47)  | 116 (46) | 106 (40) | 98 (41)  | 93 (43)  | 96 (42)  | 83 (40)  | 112 (45) |
| Nurse                                              | 483 (24)  | 13 (21)  | 37 (31)  | 56 (28)  | 69 (27)  | 54 (21)  | 58 (24)  | 24 (11)  | 58 (25)  | 45 (22)  | 69 (28)  |

|                                   |          |         |         |         |         |         |         |         |         |         |         |
|-----------------------------------|----------|---------|---------|---------|---------|---------|---------|---------|---------|---------|---------|
| Books/newspapers                  | 185 (9)  | 12 (19) | 19 (16) | 30 (15) | 25 (10) | 20 (8)  | 20 (8)  | 22 (10) | 12 (5)  | 7 (3)   | 18 (7)  |
| Relatives/friends                 | 140 (7)  | 9 (14)  | 4 (3)   | 17 (8)  | 12 (5)  | 22 (8)  | 15 (6)  | 13 (6)  | 15 (7)  | 14 (7)  | 19 (8)  |
| Internet                          | 334 (16) | 2 (3)   | 2 (2)   | 15 (7)  | 32 (13) | 47 (18) | 47 (20) | 48 (22) | 46 (20) | 39 (19) | 56 (23) |
| Advertisements                    | 153 (8)  | 4 (6)   | 5 (4)   | 11 (5)  | 12 (5)  | 11 (4)  | 86 (3)  | 10 (5)  | 6 (3)   | 6 (3)   | 2 (1)   |
| Radio/television                  | 104 (5)  | 5 (8)   | 9 (8)   | 18 (9)  | 14 (6)  | 12 (5)  | 10 (4)  | 14 (7)  | 4 (2)   | 7 (3)   | 11 (4)  |
| Health food stores                | 107 (5)  | 7 (11)  | 6 (5)   | 19 (9)  | 15 (6)  | 8 (3)   | 13 (5)  | 11 (5)  | 8 (3)   | 10 (5)  | 10 (4)  |
| Telephone services (call centres) | 7 (<1)   | -       | 0 (0)   | 1 (1)   | 2 (1)   | 3 (1)   | 0 (0)   | 0 (0)   | 0 (0)   | 0 (0)   | 1 (<1)  |
| No medicines information sources  | 219 (11) | 0 (0)   | 5 (4)   | 5 (2)   | 23 (9)  | 34 (13) | 28 (12) | 26 (12) | 39 (17) | 26 (12) | 33 (13) |

<sup>a</sup>Discrepancies in totals are due to rounding errors, <sup>b</sup>Calculated from study years available, <sup>c</sup>Percentages have been calculated for the respondents of each year who reported using medicines (list in survey) during the last week (7 days), <sup>d</sup>Respondents who had disease (list in survey) diagnosed by a physician during the last year (12 months).

For peer review only

STROBE Statement—Checklist of items that should be included in reports of *cross-sectional studies*

|                              | Item No | Recommendation                                                                                                                                                                                    | Page No |
|------------------------------|---------|---------------------------------------------------------------------------------------------------------------------------------------------------------------------------------------------------|---------|
| <b>Title and abstract</b>    | 1       | (a) Indicate the study's design with a commonly used term in the title or the abstract                                                                                                            | 1       |
|                              |         | (b) Provide in the abstract an informative and balanced summary of what was done and what was found                                                                                               | 2       |
| <b>Introduction</b>          |         |                                                                                                                                                                                                   |         |
| Background/rationale         | 2       | Explain the scientific background and rationale for the investigation being reported                                                                                                              | 4       |
| Objectives                   | 3       | State specific objectives, including any prespecified hypotheses                                                                                                                                  | 4       |
| <b>Methods</b>               |         |                                                                                                                                                                                                   |         |
| Study design                 | 4       | Present key elements of study design early in the paper                                                                                                                                           | 5,6     |
| Setting                      | 5       | Describe the setting, locations, and relevant dates, including periods of recruitment, exposure, follow-up, and data collection                                                                   | 5-7     |
| Participants                 | 6       | (a) Give the eligibility criteria, and the sources and methods of selection of participants                                                                                                       | 5,6     |
| Variables                    | 7       | Clearly define all outcomes, exposures, predictors, potential confounders, and effect modifiers. Give diagnostic criteria, if applicable                                                          | 6,7     |
| Data sources/<br>measurement | 8*      | For each variable of interest, give sources of data and details of methods of assessment (measurement). Describe comparability of assessment methods if there is more than one group              | 6       |
| Bias                         | 9       | Describe any efforts to address potential sources of bias                                                                                                                                         | 14      |
| Study size                   | 10      | Explain how the study size was arrived at                                                                                                                                                         | 8       |
| Quantitative variables       | 11      | Explain how quantitative variables were handled in the analyses. If applicable, describe which groupings were chosen and why                                                                      | 6,7     |
| Statistical methods          | 12      | (a) Describe all statistical methods, including those used to control for confounding                                                                                                             | 6,7     |
|                              |         | (b) Describe any methods used to examine subgroups and interactions                                                                                                                               | 6,7     |
|                              |         | (c) Explain how missing data were addressed                                                                                                                                                       | 6       |
|                              |         | (d) If applicable, describe analytical methods taking account of sampling strategy                                                                                                                | NA      |
|                              |         | (e) Describe any sensitivity analyses                                                                                                                                                             | NA      |
| <b>Results</b>               |         |                                                                                                                                                                                                   |         |
| Participants                 | 13*     | (a) Report numbers of individuals at each stage of study—eg numbers potentially eligible, examined for eligibility, confirmed eligible, included in the study, completing follow-up, and analysed | 8       |
|                              |         | (b) Give reasons for non-participation at each stage                                                                                                                                              | 6,8     |
|                              |         | (c) Consider use of a flow diagram                                                                                                                                                                | NA      |
| Descriptive data             | 14*     | (a) Give characteristics of study participants (eg demographic, clinical, social) and information on exposures and potential confounders                                                          | 8-10    |
|                              |         | (b) Indicate number of participants with missing data for each variable of interest                                                                                                               | 9-10    |
| Outcome data                 | 15*     | Report numbers of outcome events or summary measures                                                                                                                                              | 11,12   |
| Main results                 | 16      | (a) Give unadjusted estimates and, if applicable, confounder-adjusted                                                                                                                             | NA      |

|                          |    |                                                                                                                                                                            |                  |
|--------------------------|----|----------------------------------------------------------------------------------------------------------------------------------------------------------------------------|------------------|
|                          |    | estimates and their precision (eg, 95% confidence interval). Make clear which confounders were adjusted for and why they were included                                     |                  |
|                          |    | (b) Report category boundaries when continuous variables were categorized                                                                                                  | NA               |
|                          |    | (c) If relevant, consider translating estimates of relative risk into absolute risk for a meaningful time period                                                           | NA               |
| Other analyses           | 17 | Report other analyses done—eg analyses of subgroups and interactions, and sensitivity analyses                                                                             | 12, Appendix 1&2 |
| <b>Discussion</b>        |    |                                                                                                                                                                            |                  |
| Key results              | 18 | Summarise key results with reference to study objectives                                                                                                                   | 14,15            |
| Limitations              | 19 | Discuss limitations of the study, taking into account sources of potential bias or imprecision. Discuss both direction and magnitude of any potential bias                 | 15,16            |
| Interpretation           | 20 | Give a cautious overall interpretation of results considering objectives, limitations, multiplicity of analyses, results from similar studies, and other relevant evidence | 14-16            |
| Generalisability         | 21 | Discuss the generalisability (external validity) of the study results                                                                                                      | 15               |
| <b>Other information</b> |    |                                                                                                                                                                            |                  |
| Funding                  | 22 | Give the source of funding and the role of the funders for the present study and, if applicable, for the original study on which the present article is based              | 17               |

\*Give information separately for exposed and unexposed groups.

**Note:** An Explanation and Elaboration article discusses each checklist item and gives methodological background and published examples of transparent reporting. The STROBE checklist is best used in conjunction with this article (freely available on the Web sites of PLoS Medicine at <http://www.plosmedicine.org/>, Annals of Internal Medicine at <http://www.annals.org/>, and Epidemiology at <http://www.epidem.com/>). Information on the STROBE Initiative is available at [www.strobe-statement.org](http://www.strobe-statement.org).



# BMJ Open

## Trends in the receipt of medicines information among Finnish adults in 1999–2014: a nationwide repeated cross-sectional survey

|                                 |                                                                                                                                                                                                                                                                                                                                                                                                                                                                                      |
|---------------------------------|--------------------------------------------------------------------------------------------------------------------------------------------------------------------------------------------------------------------------------------------------------------------------------------------------------------------------------------------------------------------------------------------------------------------------------------------------------------------------------------|
| Journal:                        | <i>BMJ Open</i>                                                                                                                                                                                                                                                                                                                                                                                                                                                                      |
| Manuscript ID                   | bmjopen-2018-026377.R1                                                                                                                                                                                                                                                                                                                                                                                                                                                               |
| Article Type:                   | Research                                                                                                                                                                                                                                                                                                                                                                                                                                                                             |
| Date Submitted by the Author:   | 03-Jan-2019                                                                                                                                                                                                                                                                                                                                                                                                                                                                          |
| Complete List of Authors:       | Mononen, Niina; University of Helsinki, Faculty of Pharmacy, Division of Pharmacology and Pharmacotherapy<br>Airaksinen, Marja; University of Helsinki, Division of Pharmacology and Pharmacotherapy<br>Hämeen-Anttila, Katri; Finnish Medicines Agency FIMEA, Assessment of Pharmacotherapies<br>Helakorpi, Satu; Terveystieteiden ja hyvinvoinnin laitos<br>Pohjanoksa-Mäntylä, Marika ; University of Helsinki, Faculty of Pharmacy, Division of Pharmacology and Pharmacotherapy |
| <b>Primary Subject Heading</b>: | Health informatics                                                                                                                                                                                                                                                                                                                                                                                                                                                                   |
| Secondary Subject Heading:      | Health policy                                                                                                                                                                                                                                                                                                                                                                                                                                                                        |
| Keywords:                       | Medicines information, Medicines information sources, Population study, Repeated cross-sectional survey, Finland                                                                                                                                                                                                                                                                                                                                                                     |
|                                 |                                                                                                                                                                                                                                                                                                                                                                                                                                                                                      |

SCHOLARONE™  
Manuscripts

|                                             |                                                                                                                                                                                                                                                                                                                                                                                                                                                                                                                                                                                                                                  |
|---------------------------------------------|----------------------------------------------------------------------------------------------------------------------------------------------------------------------------------------------------------------------------------------------------------------------------------------------------------------------------------------------------------------------------------------------------------------------------------------------------------------------------------------------------------------------------------------------------------------------------------------------------------------------------------|
| <b>Title</b>                                | <b>Trends in the receipt of medicines information among Finnish adults in 1999–2014: a nationwide repeated cross-sectional survey</b>                                                                                                                                                                                                                                                                                                                                                                                                                                                                                            |
| <b>Authors' names</b>                       | Niina Mononen, Marja Airaksinen, Katri Hämeen-Anttila, Satu Helakorpi, Marika Pohjanoksa-Mäntylä                                                                                                                                                                                                                                                                                                                                                                                                                                                                                                                                 |
| <b>Address and position for each author</b> | <p>Niina Mononen, MSc (Pharm), PhD Student<br/> Marja Airaksinen, Professor, PhD<br/> Marika Pohjanoksa-Mäntylä, PhD, University Lecturer</p> <p>Clinical Pharmacy Group, Division of Pharmacology and Pharmacotherapy, Faculty of Pharmacy, University of Helsinki, 00014 University of Helsinki, Finland</p> <p>Katri Hämeen-Anttila, PhD, Research and Development Manager</p> <p>Assessment of Pharmacotherapies, Finnish Medicines Agency Fimea, P.O. Box 55, 00034 FIMEA, Finland</p> <p>Satu Helakorpi, PhD, Senior Researcher</p> <p>National Institute for Health and Welfare, P.O. Box 30, 00271 Helsinki, Finland</p> |
| <b>Corresponding author</b>                 | Niina Mononen<br>Clinical Pharmacy Group, Division of Pharmacology and Pharmacotherapy, Faculty of Pharmacy, University of Helsinki, 00014 University of Helsinki, Finland<br>E-mail: <a href="mailto:niina.mononen@helsinki.fi">niina.mononen@helsinki.fi</a><br>Telephone: +358 2941 59917                                                                                                                                                                                                                                                                                                                                     |

**Word count:** 3952

**Keywords:** Medicines information, Medicines information sources, Population study, Repeated cross-sectional survey, Finland

## ABSTRACT

### Objective

The aim of this study was to examine long-term trends in the receipt of medicines information (MI) among adult medicine users from 1999 to 2014.

### Design

Repeated cross-sectional postal survey from the years 1999, 2002, 2005 and 2008-2014.

### Setting

Each study year, a new nationally representative sample of 5000 Finns aged 15-64 years was drawn from the Population Register Centre of Finland.

### Participants

The range of annual respondents varied from 2545 to 3371 and response rates from 53% to 67%. Of the total responses (n=29465) 64% were from medicine users (n=18862, ranging by year from 58% to 68%).

### Outcome measures

Receipt of information on medicines in use within 12 months prior to the survey from a given list of consumer MI sources available in Finland.

### Results

Physicians, community pharmacists and package leaflets were the most common MI sources throughout the study period of 1999-2014. Receipt of MI increased most from the Internet (from 1% in 1999 to 16% in 2014), while decreased most from physicians (62% to 47%) and package leaflets (44% to 34%), and remained stable from community pharmacists (46% to 45%) and nurses (14% to 14%). In 1999, of the medicine users 4% did not report receipt of MI from any of the sources listed in the survey, while this proportion had remarkably increased to 28% in 2014.

### Conclusions

Healthcare professionals and package leaflets had still a dominating importance in 2014 despite the growing number of MI sources over time, but still a minority of adult medicine users reported receiving MI via the Internet in 2014. Worrying is that the proportion of adult medicine users who did not receive MI from any of the sources became 7-fold during the study period.

### Strengths and limitations of this study

- The key strength of this national population study is that it examines trends in the receipt of medicines information among adult medicine users within a 15-year time period by using representative random population samples with high enough response rates for generalizable results.
- Repeated surveys are necessary to indicate population level changes in the utilization of available MI sources and reveal needs to develop MI practices and policies at the national level.
- Due to the cross-sectional method without cohorts, it is not possible to follow up changes in the receipt of medicines information over time at the individual level.
- The data did not provide any information about the quality, validity or amount of the medicines information received.
- Factors contributing to a growing number of adult medicine users not receiving medicines information from any sources should be better understood and focused on in future research.

review only

## INTRODUCTION

Consumer access to medicines information (MI) has dramatically improved during the last decades.<sup>1-7</sup> Driving forces for more open access to MI have been drug safety issues, patients' right to know about medicinal interventions that they are exposed to and tendency to empower people in taking more responsibility for self-management of their diseases.<sup>2,4,7</sup> These changes have led to improved availability of MI, first on paper and later via the Internet and electronic applications in smartphones and other electronic devices. The applications are evolving fast towards systems enabling customized MI, interactive communications and following up treatments.<sup>1,3,4,8-10</sup> Improved communication on medications have also been a strategic priority in national and international medicines policies, e.g. within the European Union.<sup>2,4,11-16</sup>

Consumers' health information seeking, including MI seeking from various information sources, have been widely researched.<sup>17-20</sup> Previous research on the receipt of MI among the adult population have either focused on 1) particular patient groups such as asthmatics,<sup>21</sup> people with cancer,<sup>22</sup> cardiovascular diseases,<sup>23</sup> HIV/AIDS,<sup>24</sup> mental disorders<sup>25</sup> or vasculitis,<sup>26</sup> and pregnant women,<sup>27,28</sup> or 2) focused on certain medicine user groups such as users of hormone replacement therapies,<sup>29-31</sup> analgesics,<sup>32,33</sup> antidepressants,<sup>34</sup> antihypertensives,<sup>35</sup> cardiovascular medicines<sup>36</sup> or psychotropics.<sup>37</sup> Previous studies have mostly applied single cross-sectional study designs.<sup>38-46</sup> We found only one study that compared results from two years, covering a 7-year period.<sup>47</sup> The consistent findings from the previous studies are that physicians, pharmacists and package leaflets are the most common sources of MI regardless of the research method, the study year, the country and the research population.<sup>21-47</sup> Consumers usually sought MI from only one or two information sources.<sup>28,34,39,43,44</sup> The use of the Internet as a source of MI has become more common over time, but it is not yet as commonly used source of MI for consumers as healthcare professionals.<sup>22,24-26,30,31,33-35,38-40,42,44-46</sup> However, there is a lack of long-term population-based studies describing trends in the receipt of MI among adult medicine users. Repeated surveys are necessary to indicate population level changes in the utilization of available MI sources and to reveal needs to develop MI practices and policies at the national level. In Finland, improving the accessibility and quality of MI have been among the key strategic medicines policy goals over the last decades.<sup>2,15</sup> The long-term comparative information in the receipt of MI and the proportion of people receiving MI are important measures to indicate whether the desired outcomes are met. Therefore, this study examined long-term trends in the receipt of MI among Finnish adult medicine users in 1999-2014.

## METHODS

### Context

Similarly to many developed countries, availability of consumer MI has dramatically improved in Finland during the last decades.<sup>2,4,7</sup> Until 1983, patients and medicine users received information about their medicines exclusively from their physicians.<sup>7,48</sup> The remarkable landmarks towards more open access to MI have been pharmacists' duty to counsel on prescription and non-prescription medicines in 1983, followed in 1986 by the launch of the first computerized database providing leaflets for consumers in community pharmacies. Package leaflets became mandatory across the European Union in 1999.<sup>49</sup> About the same time, the Internet and mobile phones became more common and eventually revolutionized access to health and MI. "From paper the cyber" shift has improved access to statutory MI, e.g. by making package leaflets available online in written and audio format.<sup>50,51</sup> A wide range of stakeholders from the drug industry to non-profit professional and patient organisations have been developing new databases and modes for communicating on medicines to consumers. To coordinate MI practices and enhance public-private partnerships, the European Union has recommended its member states to establish national MI programs and strategies.<sup>13</sup> Such a strategy was established for the first time in Finland in 2012 by the Finnish Medicines Agency.<sup>2</sup> The ultimate goal of the strategy is to improve adherence to long-term therapies by enhanced MI by 2020.

### Study design

The study was conducted as a repeated cross-sectional postal survey using each year a new nationally representative sample (n=5000) of the Finnish adult population aged 15-64 years.<sup>52</sup> The national health behavior survey used in this study has its origins in the North Karelia Project, started in 1972, which has been instrumental in improving public health in Finland.<sup>53</sup> The annual "Health Behaviour and Health among the Finnish Adult Population" survey was established in 1978 to perform as an indicator for changes in the population health and related risk factors, such as smoking, food and alcohol consumption and physical activity.<sup>52</sup> The survey has been targeted to the adult working age population of 15-64 years old. The survey has been repeated every year in the same way to yield comparable results. In addition to the original standard set of structured questions, some other questions have been added to the survey instrument over the years. One of the added questions was the one used in our study concerning receipt of MI from different sources available for consumers/medicine users in Finland (added to the survey instrument in 1999).

1  
2  
3 The sample has been derived from the Population Register Centre of Finland which is a government-  
4 based register where all Finnish citizens and permanent residents are obliged to be registered.<sup>52,54</sup> The  
5 survey has been conducted every year (1978-2014) as a postal survey.<sup>52</sup> The distribution of the  
6 questionnaires by mail has assured better coverage of the entire study population than e.g., using online  
7 surveys. This is because the Population Register Centre has the current address available for all Finns  
8 and permanent residents. In order to maintain response rate high enough for generalizable results, three  
9 reminders were sent during the study period covered in our study (1999-2014).<sup>55</sup> Data from the years  
10 1999, 2002, 2005, 2008-2014 was compared as these are the years when the survey instrument included  
11 the question on the receipt of MI.  
12  
13  
14  
15  
16  
17  
18

### 19 **Survey instrument and measures**

20  
21  
22 The main outcome measure was the receipt of MI on medicines in use. The survey instrument contained  
23 the question “In the past year (12 months), from which sources did you receive information on the  
24 medicines you have been using?” The question was followed by a list of MI sources available for  
25 consumers in Finland at the time of the study (Fig. 1). Respondents could indicate from the list as many  
26 information sources as applicable. It was not possible to report other sources than those mentioned in  
27 the survey. In 2002, package leaflets and telephone services were added to the list of MI sources.  
28  
29  
30  
31  
32

33 Socio-demographic variables used in this study were gender and age. Health-related variables were  
34 respondents’ medicine use and diagnosed diseases. Use of medicines was assessed by the question  
35 “Have you used any tablets, powders, or other medicines within the past week (7 days)?” This question  
36 was followed by a list of commonly used prescription and non-prescription medicines for common  
37 chronic and acute conditions (Table 1). Respondents could indicate from the list as many medicines as  
38 they had been using within 7 days prior to the survey. It was not possible to report any other medicines  
39 other than those mentioned in the list. The use of medication within the past 7 days was used as a  
40 measure in order to control recall bias.<sup>56</sup> Diagnosed diseases were asked by a question “Within the past  
41 year (12 months), have you had any of the following diagnosed diseases or diseases treated by the  
42 physicians?” This question was followed by a list of chronic and acute diseases common in Finland  
43 (Table 1). Respondents could indicate from the list as many diseases as they had been suffering from  
44 within the year prior to the survey. It was not possible to report any other diseases than those mentioned  
45 in the list.  
46  
47  
48  
49  
50  
51  
52  
53  
54  
55  
56  
57  
58  
59  
60

## Analysis

Descriptive statistics were conducted with the Statistical Package for Social Sciences software (IBM SPSS Statistics for Windows, Released 2016, Version 24.0. Armonk, NY: IBM Corp.). Only respondents who reported using at least one prescription or non-prescription medicine during the 7 days' time frame prior to the survey were included in the analysis as medicine users.

Trends in the receipt of MI from different information sources and the number of MI sources used by the respondent were counted for each study year 1999-2014 (Fig. 1 and 2). The number of MI sources from which the respondents had received information on the medicines they used was divided into following groups: no sources, one, two, three, four, five and six or more sources.

The receipt of MI from different sources was plotted against gender, age, number of medicines in use and number of diagnosed diseases for each study year 1999-2014 (Appendix A, B). Age calculation was based on the year of birth, and the respondents were divided into five age groups (Table 1).

The number of medicines in use was counted for each respondent and respondents were divided into following groups: people using one, two, three, and four or more medicines (Table 1). The receipt of MI was compared between all these medicine user groups (Appendix B). Also, the number of diagnosed diseases was counted for each respondent and respondents were divided into following groups: no diseases, one, two, three or more diseases (Table 1). The receipt of MI was compared between all these groups (Appendix B).

Finally, a ratio between the mean number of medicines in use and the mean number of diagnosed diseases compared to the mean number of MI sources from which MI was received was calculated to indicate whether any remarkable changes were seen over time in the number of MI sources used in relation to morbidity and medicine use.

## Patient and public involvement

Patient perspective was taken into account in designing the research question on MI by reviewing previous international and national research on the topic.<sup>6,57-59</sup> The question as it appears in the survey instrument is a result of extensive work by senior researchers in public health and medicines information. The question was piloted in several formats with the target group (5-10 individuals from the target group recruited as a convenience sample) and the current version was found to be most valid for the primary purpose of the survey that was to indicate long-term trends. The results of the study



1  
2  
3 have not been sent to the study participants for comments, but the annual reports of the “Health  
4 Behaviour and Health among the Finnish Adult Population” surveys are available online.<sup>52</sup>  
5  
6  
7

## 8 **Research ethics**

9

10  
11 As this study was a secondary analysis using routinely collected and fully anonymized data, ethics  
12 approval was not applicable.<sup>60</sup> Responding to the survey was voluntary and considered as giving an  
13 informed consent. All study procedures were conducted according to good scientific practice.  
14  
15  
16

## 17 **RESULTS**

18

19  
20 The number of respondents varied by year from 2545 to 3371, and the response rate decreased from  
21 67% in 1999 to 53% in 2014 (Table 1). Of the total responses (n=29465) 64% were from medicine users  
22 (n=18862, ranging by year from 58% to 68%). The gender distribution of the respondents who reported  
23 using medicines remained the same throughout the study period, 61-64% being female (Table 1). The  
24 annual mean age varied between 41 and 45 years. The respondents used most commonly one medicine,  
25 ranging from 63% in 1999 to 54% in 2014 (included prescription and non-prescription medicines). The  
26 respondents reported using medicines most commonly for headaches (range 50% to 53%), other aches  
27 or pains (28% to 31%) and high blood pressure (15% to 23%). More than a third of the medicine users  
28 reported having at least one diagnosed disease of the diseases listed in the survey, increasing from 37%  
29 in 1999 to 59% in 2014). The most common diseases reported were high blood pressure or hypertension  
30 (range 18% to 25%), high blood cholesterol (13% to 21%), hay or allergic rhinitis (15% to 18%), and  
31 degenerative disk disease or other back illness (13% to 15%).  
32  
33  
34  
35  
36  
37  
38  
39  
40  
41  
42  
43  
44  
45  
46  
47  
48  
49  
50  
51  
52  
53  
54  
55  
56  
57  
58  
59  
60

Table 1. Characteristics of the respondents (n=29465) according to study year. The percentages are calculated from the total number of the respondents each year or of the respondents reporting use of at least one prescription or non-prescription medicine within 7 days prior to survey (n=18862)<sup>a</sup>.

| Characteristics                                | Total <sup>b</sup><br>n (%) | Study years   |               |               |               |               |               |               |               |               |               |
|------------------------------------------------|-----------------------------|---------------|---------------|---------------|---------------|---------------|---------------|---------------|---------------|---------------|---------------|
|                                                |                             | 1999<br>n (%) | 2002<br>n (%) | 2005<br>n (%) | 2008<br>n (%) | 2009<br>n (%) | 2010<br>n (%) | 2011<br>n (%) | 2012<br>n (%) | 2013<br>n (%) | 2014<br>n (%) |
| Number of respondents (response rate)          | 29465 (59)                  | 3371 (67)     | 3259 (65)     | 3287 (66)     | 3216 (64)     | 2943 (59)     | 2826 (57)     | 2787 (56)     | 2601 (52)     | 2545 (51)     | 2630 (53)     |
| Respondents using medicines <sup>c</sup>       | 18862 (64)                  | 1944 (58)     | 2000 (61)     | 2038 (62)     | 2101 (65)     | 1957 (66)     | 1871 (66)     | 1844 (66)     | 1759 (68)     | 1677 (66)     | 1671 (64)     |
| Gender <sup>d</sup>                            |                             |               |               |               |               |               |               |               |               |               |               |
| Female                                         | 11859 (63)                  | 1217 (63)     | 1278 (64)     | 1258 (62)     | 1332 (63)     | 1235 (63)     | 1181 (63)     | 1128 (61)     | 1101 (63)     | 1061 (63)     | 1068 (64)     |
| Male                                           | 7003 (37)                   | 727 (37)      | 722 (36)      | 780 (38)      | 769 (37)      | 722 (37)      | 690 (37)      | 716 (39)      | 658 (37)      | 616 (37)      | 603 (36)      |
| Age (years) <sup>d</sup>                       |                             |               |               |               |               |               |               |               |               |               |               |
| 15-24                                          | 2535 (13)                   | 314 (16)      | 308 (15)      | 269 (13)      | 270 (13)      | 263 (13)      | 255 (14)      | 231 (13)      | 211 (12)      | 199 (12)      | 215 (13)      |
| 25-34                                          | 2798 (15)                   | 331 (17)      | 308 (15)      | 302 (15)      | 305 (15)      | 287 (15)      | 258 (14)      | 277 (15)      | 251 (14)      | 240 (14)      | 239 (14)      |
| 35-44                                          | 3409 (18)                   | 419 (22)      | 411 (21)      | 394 (19)      | 376 (18)      | 335 (17)      | 304 (16)      | 318 (17)      | 292 (17)      | 275 (16)      | 285 (17)      |
| 45-54                                          | 4558 (24)                   | 481 (25)      | 486 (24)      | 491 (24)      | 490 (23)      | 460 (24)      | 484 (26)      | 438 (24)      | 430 (24)      | 411 (25)      | 387 (23)      |
| 55-64                                          | 5562 (29)                   | 399 (21)      | 487 (24)      | 582 (29)      | 660 (31)      | 612 (31)      | 570 (31)      | 580 (32)      | 575 (32)      | 552 (33)      | 545 (33)      |
| Mean age (Standard deviation)                  | 43.9 (14.1)                 | 41.2 (13.9)   | 42.1 (14.0)   | 43.6 (14.0)   | 44.3 (14.1)   | 44.2 (14.3)   | 44.3 (14.3)   | 44.4 (14.1)   | 44.9 (14.1)   | 45.0 (14.1)   | 44.6 (14.3)   |
| Education level <sup>d</sup>                   |                             |               |               |               |               |               |               |               |               |               |               |
| Primary school or lower ( $\leq 9$ years)      | 3048 (16)                   | 499 (26)      | 444 (22)      | 402 (20)      | 351 (17)      | 306 (16)      | 253 (14)      | 226 (12)      | 222 (13)      | 170 (10)      | 175 (10)      |
| Higher than primary school ( $>9$ years)       | 15495 (82)                  | 1420 (73)     | 1499 (75)     | 1608 (79)     | 1705 (81)     | 1621 (83)     | 1590 (85)     | 1591 (86)     | 1517 (86)     | 1482 (88)     | 1462 (87)     |
| Working status <sup>d</sup>                    |                             |               |               |               |               |               |               |               |               |               |               |
| Working <sup>e</sup>                           | 12043 (81)                  | -             | -             | 1601 (79)     | 1701 (81)     | 1588 (81)     | 1495 (80)     | 1516 (82)     | 1426 (81)     | 1331 (79)     | 1385 (83)     |
| Not working <sup>f</sup>                       | 2766 (19)                   | -             | -             | 430 (31)      | 396 (19)      | 366 (19)      | 373 (20)      | 299 (16)      | 310 (18)      | 315 (19)      | 277 (17)      |
| Respondents using medicines for <sup>d</sup>   |                             |               |               |               |               |               |               |               |               |               |               |
| Headache                                       | 9806 (52)                   | 1039 (53)     | 1032 (52)     | 1026 (50)     | 1073 (51)     | 1024 (52)     | 980 (52)      | 981 (53)      | 901 (51)      | 866 (52)      | 884 (53)      |
| Ache, pain (other than headache)               | 5467 (29)                   | 556 (29)      | 549 (28)      | 592 (29)      | 604 (29)      | 541 (28)      | 531 (29)      | 550 (30)      | 544 (31)      | 508 (30)      | 492 (29)      |
| High blood pressure                            | 4077 (22)                   | 291 (15)      | 367 (18)      | 429 (21)      | 465 (22)      | 450 (23)      | 434 (23)      | 446 (24)      | 409 (23)      | 395 (24)      | 391 (23)      |
| Contraception (oral)                           | 2310 (12)                   | 264 (14)      | 296 (15)      | 247 (12)      | 258 (12)      | 238 (12)      | 223 (12)      | 193 (11)      | 188 (11)      | 199 (12)      | 204 (12)      |
| High blood cholesterol                         | 2196 (12)                   | 98 (5)        | 143 (7)       | 217 (11)      | 263 (13)      | 296 (15)      | 290 (16)      | 235 (13)      | 217 (12)      | 211 (13)      | 226 (14)      |
| Women's hormone replacement therapy            | 2036 (11)                   | 233 (12)      | 266 (13)      | 233 (11)      | 222 (11)      | 188 (10)      | 188 (10)      | 166 (9)       | 198 (11)      | 174 (10)      | 168 (10)      |
| Cough                                          | 1316 (7)                    | 220 (11)      | 186 (9)       | 168 (8)       | 160 (8)       | 113 (6)       | 77 (4)        | 111 (6)       | 101 (6)       | 103 (6)       | 77 (5)        |
| Insomnia                                       | 1497 (8)                    | 136 (7)       | 153 (8)       | 153 (8)       | 179 (9)       | 177 (9)       | 140 (8)       | 139 (8)       | 134 (8)       | 146 (9)       | 140 (8)       |
| Sedation                                       | 915 (5)                     | 133 (7)       | 93 (5)        | 121 (6)       | 102 (5)       | 94 (5)        | 70 (4)        | 85 (5)        | 76 (4)        | 69 (4)        | 72 (4)        |
| Men's sexual potency dysfunction               | 252 (1)                     | 13 (1)        | 20 (1)        | 28 (1)        | 26 (1)        | 21 (1)        | 26 (1)        | 37 (2)        | 34 (2)        | 19 (1)        | 28 (2)        |
| Depression <sup>h</sup>                        | 1314 (7)                    | -             | 111 (6)       | 143 (7)       | 148 (7)       | 176 (9)       | 136 (5)       | 147 (8)       | 173 (10)      | 134 (8)       | 146 (9)       |
| Diabetes (other than insulin) <sup>i</sup>     | 705 (4)                     | -             | -             | 72 (4)        | 82 (4)        | 88 (4)        | 88 (5)        | 80 (4)        | 98 (6)        | 91 (5)        | 106 (6)       |
| Diabetes (insulin) <sup>i</sup>                | 361 (2)                     | -             | -             | 46 (2)        | 49 (2)        | 46 (2)        | 47 (3)        | 51 (3)        | 36 (2)        | 50 (3)        | 36 (2)        |
| Number of medicines in use/person <sup>d</sup> |                             |               |               |               |               |               |               |               |               |               |               |
| 1                                              | 10558 (56)                  | 1215 (63)     | 1183 (59)     | 1143 (56)     | 1154 (55)     | 1060 (54)     | 1029 (55)     | 1011 (55)     | 946 (54)      | 907 (54)      | 910 (54)      |
| 2                                              | 5116 (27)                   | 505 (26)      | 559 (28)      | 566 (28)      | 584 (28)      | 536 (27)      | 512 (27)      | 491 (27)      | 492 (28)      | 442 (26)      | 429 (26)      |

|                                                                  |           |           |           |          |          |          |          |          |          |          |          |
|------------------------------------------------------------------|-----------|-----------|-----------|----------|----------|----------|----------|----------|----------|----------|----------|
| 3                                                                | 1984 (11) | 161 (8)   | 166 (8)   | 198 (10) | 221 (11) | 220 (11) | 210 (11) | 210 (11) | 191 (11) | 208 (12) | 199 (12) |
| >3                                                               | 1204 (6)  | 63 (3)    | 92 (5)    | 131 (6)  | 142 (7)  | 141 (7)  | 120 (6)  | 132 (7)  | 130 (7)  | 120 (7)  | 133 (8)  |
| Respondents with diagnosed diseases <sup>d,e</sup>               |           |           |           |          |          |          |          |          |          |          |          |
| High blood pressure, hypertension                                | 4297 (23) | 345 (18)  | 426 (21)  | 465 (23) | 496 (24) | 478 (24) | 443 (24) | 468 (25) | 421 (24) | 379 (22) | 376 (23) |
| Degenerative disc disease, other back illness                    | 2712 (14) | 262 (14)  | 284 (14)  | 314 (15) | 321 (15) | 263 (13) | 260 (14) | 272 (15) | 260 (15) | 227 (14) | 249 (15) |
| Asthma                                                           | 1163 (6)  | 113 (6)   | 114 (6)   | 112 (6)  | 120 (6)  | 132 (7)  | 125 (7)  | 113 (6)  | 120 (7)  | 99 (6)   | 115 (7)  |
| Digestive illness (gastritis catarrh, gastritis, ulcer)          | 904 (5)   | 96 (5)    | 97 (5)    | 108 (5)  | 110 (5)  | 93 (5)   | 91 (5)   | 70 (4)   | 85 (5)   | 89 (5)   | 65 (4)   |
| Coronary disease, angina pectoris (= chest pain during exercise) | 414 (2)   | 66 (3)    | 48 (2)    | 52 (3)   | 47 (2)   | 35 (2)   | 41 (2)   | 34 (2)   | 31 (2)   | 26 (2)   | 30 (2)   |
| Diabetes                                                         | 1092 (6)  | 50 (2)    | 78 (4)    | 113 (6)  | 121 (6)  | 129 (7)  | 121 (7)  | 110 (6)  | 124 (7)  | 108 (6)  | 138 (8)  |
| Rheumatoid arthritis                                             | 396 (2)   | 46 (2)    | 36 (2)    | 37 (2)   | 46 (2)   | 37 (2)   | 40 (2)   | 41 (2)   | 44 (3)   | 37 (2)   | 32 (2)   |
| Chronic bronchitis, pulmonary emphysema                          | 322 (2)   | 34 (2)    | 30 (2)    | 35 (2)   | 38 (2)   | 52 (3)   | 28 (2)   | 36 (2)   | 20 (1)   | 22 (1)   | 27 (2)   |
| Coronary thrombosis, myocardial infarction                       | 118 (1)   | 9 (1)     | 13 (1)    | 13 (1)   | 13 (1)   | 8 (<1)   | 11 (1)   | 17 (1)   | 10 (1)   | 9 (1)    | 15 (1)   |
| High blood cholesterol <sup>h</sup>                              | 2913 (17) | -         | 267 (13)  | 338 (17) | 356 (17) | 409 (21) | 368 (20) | 319 (17) | 282 (16) | 287 (16) | 287 (17) |
| Depression <sup>i</sup>                                          | 1242 (8)  | -         | -         | 173 (9)  | 175 (8)  | 178 (9)  | 134 (7)  | 150 (8)  | 161 (9)  | 124 (7)  | 147 (9)  |
| Other mental health disorder <sup>i</sup>                        | 534 (4)   | -         | -         | 64 (3)   | 73 (4)   | 66 (3)   | 47 (3)   | 82 (4)   | 65 (4)   | 73 (4)   | 64 (4)   |
| Cancer <sup>i</sup>                                              | 206 (1)   | -         | -         | 29 (1)   | 26 (1)   | 26 (1)   | 28 (2)   | 23 (1)   | 34 (2)   | 23 (1)   | 17 (1)   |
| Hay or allergic rhinitis <sup>j</sup>                            | 2044 (16) | -         | -         | -        | 340 (16) | 292 (15) | 275 (15) | 272 (15) | 283 (16) | 275 (16) | 307 (18) |
| Food allergy <sup>j</sup>                                        | 580 (5)   | -         | -         | -        | 85 (4)   | 84 (4)   | 92 (4)   | 78 (4)   | 85 (5)   | 72 (4)   | 84 (5)   |
| Number of diagnosed diseases/person <sup>d,e</sup>               |           |           |           |          |          |          |          |          |          |          |          |
| 0                                                                | 8590 (46) | 1228 (63) | 1121 (56) | 971 (48) | 864 (41) | 787 (40) | 811 (43) | 754 (41) | 712 (40) | 723 (43) | 689 (41) |
| 1                                                                | 5176 (27) | 502 (26)  | 527 (26)  | 593 (29) | 616 (29) | 557 (29) | 492 (26) | 539 (29) | 521 (30) | 465 (28) | 450 (27) |
| 2                                                                | 2924 (16) | 151 (8)   | 232 (12)  | 270 (13) | 368 (18) | 350 (18) | 331 (18) | 337 (18) | 296 (17) | 280 (17) | 285 (17) |
| >2                                                               | 2172 (12) | 63 (3)    | 120 (6)   | 204 (10) | 253 (12) | 263 (13) | 237 (13) | 214 (12) | 230 (13) | 209 (13) | 247 (15) |

<sup>a</sup>Discrepancies in totals are due to rounding errors, <sup>b</sup>Calculated from study years available, <sup>c</sup>Percentages have been calculated from the respondents of each year, <sup>d</sup>Percentages have been calculated from the respondents of each year who reported using medicines, including prescription and non-prescription medicines (list in the survey) during the last week (7 days), <sup>e</sup>Including at work, partly at work, laid off, student, homemaker, on sick leave (>6 months), or otherwise out of work (added to the survey instrument in 2005), <sup>f</sup>Including retired and unemployed (added to the survey instrument in 2005), <sup>g</sup>Respondents who had a disease (list in the survey) diagnosed by a physician during the last year (12 months), <sup>h</sup>Added to the survey instrument in 2002, <sup>i</sup>Added to the survey instrument in 2005, <sup>j</sup>Added to the survey instrument in 2008.

### Medicines information sources among adult medicine users

The most commonly reported MI sources were physicians, community pharmacists and package leaflets throughout the study period 1999-2014 among adult medicine users (Fig. 1). These information sources were most common despite gender, age, number of medicines in use or diagnosed diseases (Appendix A,B). Receipt of MI from physicians (from 62% in 1999 to 47% in 2014) and package leaflets (44% to 34%) decreased most during the study period, while remained stable from community pharmacists (46% to 45%) and nurses (14% to 14%) (Fig. 1). In 1999, of the medicine users 17% (n=335/1944) did not report any healthcare professionals (physicians, community pharmacists or nurses) as their source of MI, and by 2014 the proportion had grown to 38% (n=639/1671). The use of the Internet as MI source increased rather steadily being 1% in 1999 and 16% in 2014.

Add figure 1 in here.

The number of MI sources from which medicine users reported receipt of MI changed over the study period 1999-2014 (Fig. 2). The most noticeable decreases occurred in those who reported receipt of MI from one (47% to 21%) or two (30 % to 22%) sources. The number of medicine users receiving MI from more than two sources increased moderately. In 1999, of the medicine users 4% (n=77/1944) did not report receipt of MI from any of the information sources listed in the survey, while this proportion had increased to 28% (n=467/1671) in 2014.

Add figure 2 in here.

### Receipt of medicines information and associated factors

Women reported receiving MI from all information sources listed in the survey more commonly than men during the study period (Appendix A). Receipt of MI from physicians decreased most among women (from 66% in 1999 to 48% in 2014) and among medicine users aged over 45 years (75% to 52%). Receipt of MI from package leaflets decreased both in women (48% to 38%) and men (36% to 26%), while remained nearly unchanged from community pharmacists (51% to 47% in women vs. 37% to 42% in men). The receipt of MI from community pharmacists increased most among medicine users aged 55-64 years (34% to 46%), and decreased most among medicine users aged 33-44 years (55% to 43%). Package leaflets, relatives and friends were reported to be most common MI sources for medicine users under 25 years, although receipt of MI from package leaflets (59% to 37%) and from relatives and friends (35% to 16%) decreased most in this age group. Receipt of MI from the Internet increased in both genders, slightly more in women than in men (2% to 18% vs. 1% to 12%, respectively), and in all age groups, most among medicine users aged 25-34 years (2% to 21%) and 15-24 years (2% to 20%).

1  
2  
3 More male (6% to 33%) than female (3% to 25%) and more medicine users under 45 years (5% to 33%)  
4 than medicine users 45 years or older (3% to 25%) did not report receipt of MI from any of the  
5 information sources listed in the survey during the study period.  
6  
7

8  
9  
10 As the number of medicines in use or the number of diagnosed diseases increased, the number of  
11 different MI sources increased (Appendix B). However, the opposite changes occurred in the receipt of  
12 MI from physicians, the proportion of medicine users receiving MI from physicians decreased 14-26%  
13 depending on the number of medicines in use or the number of diagnosed diseases, the highest decline  
14 occurring for medicine users with two medicines (76% to 52%) and for medicine users with two  
15 diagnosed diseases (83% to 57%). The number of medicines and the number of diagnosed diseases had  
16 the opposite influence on the receipt of MI from community pharmacists. The receipt of MI from  
17 community pharmacists increased most in medicine users with three medicines (47% to 59%) and in  
18 those with three or more diagnosed diseases (49% to 63%), whereas the receipt of MI decreased most  
19 in medicine users with one medicine (44% to 38%) and in those medicine users without any diagnosed  
20 diseases (45% to 34%). Receipt of MI package leaflets decreased mainly in all medicine users, most in  
21 those with one (40% to 28%) or two (48% to 35%) medicines in use and in medicine users without any  
22 diagnosed diseases (44% to 30%) or in those with one diagnosed disease (43% to 31%). Receipt of MI  
23 from the Internet increased in all medicine users regardless the number of medicines in use or the  
24 number of diagnosed diseases, most among respondents with two (1% to 19%) and four or more  
25 medicines (5% to 22%), and respondents with three or more diagnosed diseases (3% to 23%).  
26 Respondents using one (6% to 35%) or two (1% to 24%) medicines and medicine users without any  
27 diagnosed disease listed in the survey (5% to 38%) or with one disease (2% to 25%) most commonly  
28 did not report receipt of MI from any of the information sources listed in the survey during the study  
29 period.  
30  
31  
32  
33  
34  
35  
36  
37  
38  
39  
40  
41

42 Overall, the mean number of medicines in use and the mean number of diagnosed diseases increased  
43 slightly among medicine users, while the mean number of MI sources from which MI was received  
44 remained relatively stable during the study period 1999-2014 (Fig. 3). The ratio between the mean  
45 number of medicines in use and the mean number of MI sources from which MI was received remained  
46 relatively stable, but the ratio between the mean number of diagnosed diseases and the mean number of  
47 MI sources increased.  
48  
49  
50  
51

52  
53 Add figure 3. in here.  
54  
55  
56  
57  
58  
59  
60

## DISCUSSION

To our knowledge, this is the first study analyzing long-term national trends in the receipt of MI among adult population. The 15-year period covered in this study (1999-2014) provides unique insights into how improved consumer access to MI and the shift from paper to cyber have influenced receipt of MI from various sources. It seems that the key MI sources (physicians, community pharmacists, package leaflets) have remained similar which is in line with previous studies.<sup>21-47</sup> Surprising was that even though the availability and the use of MI sources has diversified among the adult population, an increasing number of medicine users did not report receipt of MI from any of the sources.

The proportion of medicine users who did not report receiving MI from any of the listed sources became 7-fold during the study period (4% to 28%). Furthermore, the proportion of those who did not report receiving MI on medicines they used from any of the healthcare professionals more than doubled from 17% in 1999 to 38% in 2014. Particularly, MI received from the physicians declined over time. The decline was similar (22-26%) in respondents using 2 or more medicines or having or not having diagnosed diseases. According to age, the decline was most evident among medicine users 45 years and older. These findings may indicate that physicians are becoming less involved in actual patient care as the healthcare has become more fragmented. Thus, time allocated for physician office visits has shortened, leading to a situation that physicians do not have time to concentrate on their patients' medications.<sup>61-64</sup> Consequently, those medicine users who were dependent on MI received from their physicians do not have that source available anymore. It also seems that community pharmacists have become more common sources of MI for people with multiple medications instead of physicians, but nurses have not replaced physicians as a MI source. In the future, special attention should be paid to the receipt of MI among people with multiple diseases and medications and the aging populations whose proportion is growing.

Our findings indicate that MI is not evenly distributed among medicine users, it may have become more unevenly distributed over time. According to the present study, gender, age, number of medicines in use and number of diseases were associated with the receipt of MI. During the study period, women, people aged 45 years or older, people with three or more medicines in use and people with three or more diagnosed diseases received MI more commonly on their medicines than other adult medicine users. These findings are in line with previous cross-sectional studies.<sup>23,25,26,40,41</sup> Other previous studies have shown that MI seeking behavior and the use of MI sources is usually influenced by gender and age, but also education, ethnic background, income, employment, health status and medical history.<sup>27,34,39</sup> Potential reasons and system-based root causes for differences in the receipt of MI among medicine users need to be addressed in future research. Our example from Finland demonstrates that availability

1  
2  
3 of a wide range of MI sources does not necessarily guarantee their actual and evenly distributed use  
4 among medicine users.  
5  
6

7  
8 This study indicates that the receipt of MI from the Internet was quite rare as more than 90% of the  
9 Finns aged 16-64 years were Internet users in 2014.<sup>65</sup> There are no similar population-based long-term  
10 trend studies from other countries to compare our results. According to previous studies, use of the  
11 Internet as a source of MI has varied between 4% and 29% in the 2000s.<sup>22,25,31,33,34,39,40,42,44-46</sup> It is also  
12 known that some patient and medicine user groups use the Internet considerably more (59-68%) than  
13 the adult population in general, e.g. patients with chronic conditions and pregnant women.<sup>27,28,41</sup> Thus,  
14 if we want to reach the majority of the adult population, we could not solely count on the Internet-based  
15 MI sources and services. Further population-based research is needed to get a more comprehensive  
16 understanding of the importance and usage patterns of the Internet as a MI source, also the opportunities  
17 it provides for improving MI for various medication user segments.  
18  
19  
20  
21  
22  
23

#### 24 25 **Strengths and limitations of this study** 26

27  
28 As a repeated national population survey, this study allows for examination of trends over time at the  
29 population level. Although the response rate decreased from 67% to 53% during the study period,  
30 reflecting that the representativeness of the results to the entire population is getting weaker, it is still  
31 adequate for generalizable results.<sup>66,67</sup> The non-respondents more often tended to be young men,  
32 unmarried or single and with a lower level of education.<sup>55</sup> Due to the cross-sectional method without  
33 cohorts, it is not possible to follow up changes in the receipt of MI over time at the individual level.  
34 The respondents did not have the opportunity to report MI from other sources than those listed in the  
35 survey, to report separately MI sources on prescription and non-prescription medicines, and to  
36 distinguish between active MI seeking or passive receipt of MI. This should be taken account when  
37 interpreting results and potential implications. For example, the gender difference in the use of MI  
38 sources may differ depending on whether these are discrepancies in the information being provided or  
39 gender differences in information seeking-behaviors.<sup>23,25,26,33,40,41,45</sup> Furthermore, people using  
40 prescription vs. non-prescription medicines may differ in the amount and use of different MI sources.  
41 However, in Finland all medicine users should receive MI from their healthcare providers while  
42 prescribing and dispensing both prescription and non-prescription medicines.<sup>68,69</sup> The data did not  
43 provide any information about the quality, validity or amount of the MI received.  
44  
45  
46  
47  
48  
49  
50  
51  
52  
53  
54  
55  
56  
57  
58  
59  
60

### Implications and future research

The strategic development of MI will continue both nationally and internationally to ensure the availability and access to reliable, up-to-date and high quality MI and MI sources.<sup>2,4,13,70</sup> As part of this work, it is necessary to continue research on trends in the receipt of MI at the population level and to identify population groups needing special attention, such as older adults. Consumers' MI literacy should be further investigated and considered in the development of MI for different patient and medicine user groups, e.g. by including the question related to MI literacy in population surveys. The present study provides a foundation for further analysis that could go deeper in understanding receipt of MI in various population groups, changes over time and factors influencing it. Further studies are needed also on factors contributing to a growing number of medicine users not receiving MI from any sources.

### CONCLUSIONS

Healthcare professionals and package leaflets had still a dominating importance in 2014 despite the growing number of MI sources over time, but still a minority of adult medicine users reported receiving MI via the Internet in 2014. Worrying is that the proportion of adult medicine users who did not receive MI from any of the sources became 7-fold during the study period.



1  
2  
3 We thank the National Institute for Health and Welfare for providing their incidence data and consumers  
4 who participated in the study and the pilot study. We gratefully acknowledge to the Elli Turunen fund  
5 of the Finnish Cultural Foundation provided funding for this research. We warmly thank Richard  
6 Stevenson for proofreading the manuscript.  
7

8  
9 **Contributors:** SH has been involved in designing the survey. SH and MA have been involved in  
10 developing the survey instrument concerning the receipt of medicines information. NM, MA, KH and  
11 MPM planned the analysis and reporting this particular study. The data were applied from the  
12 National Institute for Health and Welfare. NM performed the data analysis, and MA, KH, SH and  
13 MPM contributed in the interpretation of the data. NM prepared the initial draft of the manuscript.  
14 MA, KH, SH and MPM critically reviewed and revised the manuscript. All authors read and gave the  
15 final approval of the version to be published.  
16

17  
18 **Funding:** This research was supported by the Elli Turunen Fund of the Finnish Cultural Foundation.  
19

20  
21 **Competing interests:** None declared.  
22

23 **Patient consent:** Not required.  
24

25  
26 **Ethical approval:** As this study was a secondary analysis using routinely collected and fully  
27 anonymized data, ethics approval was not applicable. Answering the survey was considered as giving  
28 informed consent. The study followed the national ethical guidelines for researchers<sup>60</sup>. All study  
29 procedures were conducted in accordance with good research practice.  
30

31 **Data sharing:** No additional data available.  
32  
33  
34  
35  
36  
37  
38  
39  
40  
41  
42  
43  
44  
45  
46  
47  
48  
49  
50  
51  
52  
53  
54  
55  
56  
57  
58  
59  
60

**REFERENCES**

- 1 Bailey SC, Belter LT, Pandit AU, et al. The availability, functionality, and quality of mobile  
2 applications supporting medication self-management. *J Am Med Inform Assoc* 2014;21:542–6.  
3 doi:10.1136/amiajnl-2013-002232 [published Online First: 25 October 2013].
- 4  
5  
6  
7  
8  
9  
10  
11 2 Finnish Medicines Agency Fimea. Rational use of medicines through information and guidance.  
12 Medicines information services: Current state and strategy for 2020. *Serial Publication Fimea*  
13 *Develops, Assesses and Informs* 1/2012. 2012.  
14 [https://www.fimea.fi/documents/542809/838272/21513\\_KAI\\_JULKAISUSARJA\\_Laakeinformatios](https://www.fimea.fi/documents/542809/838272/21513_KAI_JULKAISUSARJA_Laakeinformatios)  
15 [trategia\\_1\\_2012\\_eng\\_links.pdf](https://www.fimea.fi/documents/542809/838272/21513_KAI_JULKAISUSARJA_Laakeinformatios) (accessed 23 Aug 2018).
- 16  
17  
18 3 Ho I, Nielsen L, Jacobsgaard H, et al. Chat-based telepharmacy in Denmark: Design and early  
19 results. *Int J Pharm Pract* 2015;23:61–6. doi:10.1111/ijpp.12109 [published Online First: 17 March  
20 2014].
- 21  
22 4 International Pharmaceutical Federation. Medicines information: Strategic development. The  
23 Hague: International Pharmaceutical Federation. 2017. [https://fip.org/files/fip/publications/2017-01-](https://fip.org/files/fip/publications/2017-01-Medicines-information-strategic-development.pdf)  
24 [Medicines-information-strategic-development.pdf](https://fip.org/files/fip/publications/2017-01-Medicines-information-strategic-development.pdf) (accessed 21 Jun 2018).
- 25  
26 5 Lee K, Hoti K, Hughes JD, et al. Dr Google and the consumer: A qualitative study exploring the  
27 navigational needs and online health information-seeking behaviors of consumers with chronic health  
28 conditions. *J Med Internet Res* 2014;16:e262. doi:10.2196/jmir.3706 (accessed 23 Aug 2018).
- 29  
30 6 Mononen N, Järvinen R, Hämeen-Anttila K, et al. A national approach to medicines information  
31 research: A systematic review. *Res Soc Adm Pharm* 2018;14:1106–24.  
32 doi:10.1016/j.sapharm.2018.01.011 [published Online First: 31 January 2018].
- 33  
34 7 Pohjanoksa-Mäntylä M. Medicines information sources and services for consumers: A special focus  
35 on the Internet and people with depression [dissertation]. University of Helsinki. 2010.  
36 <http://urn.fi/URN:ISBN:978-952-10-6128-8> (accessed 23 Aug 2018).
- 37  
38 8 Benetoli A, Chen TF, Spagnardi S, et al. Provision of a medicines information service to consumers  
39 on Facebook: An Australian case study. *J Med Internet Res* 2015;17:e265. doi:10.2196/jmir.4161  
40 (accessed 23 Aug 2018).
- 41  
42 9 Eysenbach G, Powell J, Englesakis M, et al. Health related virtual communities and electronic  
43 support groups: Systematic review of the effects of online peer to peer interactions. *BMJ*  
44 2004;328:1166. doi:10.1136/bmj.328.7449.1166 [published Online First: 13 May 2004].
- 45  
46 10 Hanlon P, Daines L, Campbell C, et al. Telehealth interventions to support self-management of  
47 long-term conditions: A systematic metareview of diabetes, heart failure, asthma, chronic obstructive  
48 pulmonary disease, and cancer. *J Med Internet Res* 2017;19:e172. doi:10.2196/jmir.6688 (accessed 23  
49 Aug 2018).
- 50  
51 11 Department of Health. Better information, better choices, better health: Putting information at the  
52 centre of health. 2004.  
53 [http://www.formazione.eu.com/\\_documents/consenso/documenti/better%20information.pdf](http://www.formazione.eu.com/_documents/consenso/documenti/better%20information.pdf) (accessed  
54 21 Jun 2018).
- 55  
56 12 Department of Health. The power of information: Putting all of us in control of the health and care  
57 information we need. 2012.  
58 [https://data.gov.uk/sites/default/files/DH%20Open%20Data%20Strategy\\_10.pdf](https://data.gov.uk/sites/default/files/DH%20Open%20Data%20Strategy_10.pdf) (accessed 21 Jun  
59 2018).
- 60

1  
2  
3 13 European Commission. High Level Pharmaceutical Forum 2005-2008: Conclusions and  
4 recommendations. European Communities. 2008. doi:10.2772/22720 (accessed 21 Jun 2018).  
5

6 14 Ministry of Health and Social Affairs. The national pharmaceutical strategy 2016–2018.  
7 Government Offices of Sweden. 2015. [https://lakemedelsverket.se/upload/om-](https://lakemedelsverket.se/upload/om-lakemedelsverket/NLS/The-National-Pharmaceutical-Strategy-2016-2018.pdf)  
8 [lakemedelsverket/NLS/The-National-Pharmaceutical-Strategy-2016-2018.pdf](https://lakemedelsverket.se/upload/om-lakemedelsverket/NLS/The-National-Pharmaceutical-Strategy-2016-2018.pdf) (accessed 21 Jun 2018).  
9

10 15 Ministry of Social Affairs and Health. Medicines Policy 2020: Towards efficient, safe, rational and  
11 cost effective use of medicines. Ministry of Social Affairs and Health. 2011.  
12 <http://urn.fi/URN:ISBN:978-952-00-3101-5> (accessed 21 Jun 2018).  
13

14 16 Pharmaceutical Society of Ireland. Future pharmacy practice in Ireland: Meeting patients' needs.  
15 2016.  
16 [https://www.thepsi.ie/Libraries/Pharmacy\\_Practice/PSI\\_Future\\_Pharmacy\\_Practice\\_in\\_Ireland.sflb.as](https://www.thepsi.ie/Libraries/Pharmacy_Practice/PSI_Future_Pharmacy_Practice_in_Ireland.sflb.as)  
17 [hx](https://www.thepsi.ie/Libraries/Pharmacy_Practice/PSI_Future_Pharmacy_Practice_in_Ireland.sflb.as) (accessed 21 Jun 2018).  
18

19 17 Finney Rutten LJ, Agunwamba AA, Wilson P, et al. Cancer-related information seeking among  
20 cancer survivors: Trends over a decade (2003-2013). *J Cancer Educ* 2016;31:348–57.  
21 doi:10.1007/s13187-015-0802-7 [published Online First: 26 February 2015].  
22

23 18 Kalantzi S, Kostagiolas P, Kechagias G, et al. Information seeking behavior of patients with  
24 diabetes mellitus: A cross-sectional study in an outpatient clinic of a university-affiliated hospital in  
25 Athens, Greece. *BMC Res Notes* 2015;8:48. doi:10.1186/s13104-015-1005-3 [published Online First:  
26 20 February 2015].  
27

28 19 Somera LP, Lee HR, Badowski G, et al. Health information seeking, source trust, and culture: A  
29 comparative analysis of health information trends and needs between Guam and the United States. *J*  
30 *Health Commun* 2016;21:469–78. doi:10.1080/10810730.2015.1095822 [published Online First: 16  
31 March 2016].  
32

33 20 Volkman JE, Luger TM, Harvey KLL, et al. The National Cancer Institute's Health Information  
34 National Trends Survey [HINTS]: A national cross-sectional analysis of talking to your doctor and  
35 other healthcare providers for health information. *BMC Fam Pract* 2014;15:111. doi:10.1186/1471-2296-  
36 15-111 [published Online First: 6 June 2014].  
37

38 21 Raynor DK, Savage I, Knapp P, et al. We are the experts: people with asthma talk about their  
39 medicines information needs. *Patient Educ Couns* 2004;53:167–74. doi:10.1016/S0738-  
40 3991(03)00126-5 [published Online First: 24 June 2003].  
41

42 22 Chen X, Siu LL. Impact of the media and the internet on oncology: survey of cancer patients and  
43 oncologists in Canada. *J Clin Oncol* 2001;19:4291–7. doi:10.1200/JCO.2001.19.23.4291 (accessed 21  
44 Jun 2018).  
45

46 23 Bults M, Beaujean DJMA, Wijkmans CJ, et al. Why did patients with cardiovascular disease in the  
47 Netherlands accept Q fever vaccination? *Vaccine* 2012;30:3369–75.  
48 doi:10.1016/j.vaccine.2012.03.056 [published Online First: 1 April 2012].  
49

50 24 Zukoski AP, Thorburn S, Stroud J. Seeking information about HIV/AIDS: A qualitative study of  
51 health literacy among people living with HIV/AIDS in a low prevalence context. *AIDS care*  
52 2011;23:1505–8. doi:10.1080/09540121.2011.582077 [published Online First: 14 June 2011].  
53

54 25 Pohjanoksa-Mäntylä M, Bell JS, Helakorpi S, et al. Is the Internet replacing health professionals?  
55 A population survey on sources of medicines information among people with mental disorders. *Soc*  
56 *Psychiatry Psychiatr Epidemiol* 2011;46:373–9. doi:10.1007/s00127-010-0201-7 [published Online  
57 First: 12 March 2010].  
58  
59  
60

- 1  
2  
3 26 Carpenter DM, DeVellis RF, Hogan SL, et al. Use and perceived credibility of medication  
4 information sources for patients with a rare illness: Differences by gender. *J Health Commun*  
5 2011;16:629–42. doi:10.1080/10810730.2011.551995 [published Online First: 1 June 2011].  
6  
7 27 Hämeen-Anttila K, Jyrkkä J, Enlund H, et al. Medicines information needs during pregnancy: A  
8 multinational comparison. *BMJ Open* 2013;3:e002594. doi:10.1136/bmjopen-2013-002594 (accessed  
9 21 Jun 2018).  
10  
11 28 Hämeen-Anttila K, Nordeng H, Kokki E, et al. Multiple information sources and consequences of  
12 conflicting information about medicine use during pregnancy: A multinational Internet-based survey.  
13 *J Med Internet Res* 2014;16:e60. doi:10.2196/jmir.2939 (accessed 21 Jun 2018).  
14  
15 29 Tiihonen MJ, Heikkinen AM, Ahonen RS. Do Finnish women using hormone replacement therapy  
16 need more information about risks. *Pharm World Sci* 2007;29:635–40. doi:10.1007/s11096-007-  
17 9115-1 [published Online First: 12 April 2007].  
18  
19 30 Tiihonen M, Saarela M, Saarinen S, et al. Menopausal hormone therapy — Benefits, adverse  
20 reactions, concerns and information sources in 2009. *Maturitas* 2011;70:69–73.  
21 doi:10.1016/j.maturitas.2011.06.001 [published Online First: 1 July 2011].  
22  
23 31 Wathen CN. Health information seeking in context: How women make decisions regarding  
24 hormone replacement therapy. *J Health Commun* 2006;11:477–93. doi:10.1080/10810730600751979  
25 [published Online First: 15 August 2006].  
26  
27 32 Ngo SNT, Stupans I, Leong WS, et al. Appropriate use of non-prescription ibuprofen: A survey of  
28 patients' perceptions and understanding. *Int J Pharm Pract* 2010;18:63–5.  
29 doi:10.1211/ijpp.18.01.0011 [published Online First: 22 March 2010].  
30  
31 33 Närhi U, Helakorpi S. Analgesic users' sources of medicine information. *Int J Pharm Pract*  
32 2007;15:251–3. doi:10.1211/ijpp.15.3.0013 (accessed 21 Jun 2018).  
33  
34 34 Sleath B, Wurst K, Lowery T. Drug information sources and antidepressant adherence. *Community*  
35 *Ment Health J* 2003;39:359–68. doi:10.1023/A:1024080410284 (accessed 21 Jun 2018).  
36  
37 35 Baldwin AS, Cvangros JA, Christensen AJ, et al. Preferences for a patient-centered role  
38 orientation: Association with patient-information-seeking behavior and clinical markers of health. *Ann*  
39 *Behav Med* 2008;35:80–6. doi:10.1007/s12160-007-9011-x (accessed 21 Jun 2018).  
40  
41 36 Gordon K, Smith F, Dhillon S. Effective chronic disease management: Patients' perspectives on  
42 medication-related problems. *Patient Educ Couns* 2007;65:407–15. doi:10.1016/j.pec.2006.09.012  
43 [published Online First: 1 November 2006].  
44  
45 37 Black E, Murphy AL, Gardner DM. Community pharmacists services for people with mental  
46 illnesses: Preferences, satisfaction, and stigma. *Psychiatr Serv* 2009;60:1123–7.  
47 doi:10.1176/ps.2009.60.8.1123 (accessed 21 Jun 2018).  
48  
49 38 Carter SR, Moles R, White L, et al. Medication information seeking behavior of patients who use  
50 multiple medicines: How does it affect adherence? *Patient Educ Couns* 2013;92:74–80.  
51 doi:10.1016/j.pec.2013.01.019 [published Online First: 22 February 2013].  
52  
53 39 DeLorme DE, Huh J, Reid LN. Source selection in prescription drug information seeking and  
54 influencing factors: Applying the comprehensive model of information seeking in an American  
55 context. *J Health Commun* 2011;16:766–87. doi:10.1080/10810730.2011.561914 [published Online  
56 First: 24 May 2011].  
57  
58  
59  
60

- 1  
2  
3 40 Ho CH, Ko Y, Tan ML. Patient needs and sources of drug information in Singapore: Is the internet  
4 replacing former sources? *Ann Pharmacother* 2009;43:732–9. doi:10.1345/aph.1L580 [published  
5 Online First: 31 March 2009].  
6  
7 41 Hämeen-Anttila K, Pietilä K, Pylkkänen L, et al. Internet as a source of medicines information  
8 (MI) among frequent internet users. *Res Soc Adm Pharm* 2018;14:758–64.  
9 doi:10.1016/j.sapharm.2017.09.007 [published Online First: 30 September 2017].  
10  
11 42 Krska J, Morecroft CW. Patients' use of information about medicine side effects in relation to  
12 experiences of suspected adverse drug reactions: A cross-sectional survey in medical in-patients.  
13 *Drug saf* 2013;36:673–80. doi:10.1007/s40264-013-0065-3 [published Online First: 23 My 2013].  
14  
15 43 Newby DA, Hill SR, Barker BJ, et al. Drug information for consumers: should it be disease or  
16 medication specific? Results of a community survey. *Aust N Z J Public Health* 2001;25:564–70.  
17 doi:10.1111/j.1467-842X.2001.tb00327.x (accessed 21 Jun 2018).  
18  
19 44 Närhi U. Sources of medicine information and their reliability evaluated by medicine users. *Pharm*  
20 *World Sci* 2007;29:688–94. doi:10.1007/s11096-007-9131-1 [published Online First: 4 May 2007].  
21  
22 45 Närhi U, Helakorpi S. Sources of medicine information in Finland. *Health Policy* 2007;84:51–7.  
23 doi:10.1016/j.healthpol.2007.05.005 [published Online First: 27 June 2007].  
24  
25 46 Tio J, LaCaze A, Neil Cottrell WN. Ascertaining consumer perspectives of medication information  
26 sources using a modified repertory grid technique. *Pharm World Sci* 2007;29:73–80.  
27 doi:10.1007/s11096-006-9076-9 [published Online First: 23 December 2006].  
28  
29 47 Tiihonen M, Heikkinen AM, Leppänen HM, et al. Information sources used by women in Finland  
30 who use hormonal contraceptives. *Pharm World Sci* 2010;32:66–72. doi:10.1007/s11096-009-9344-6  
31 [published Online First: 30 October 2009].  
32  
33 48 Puumalainen I. Development of instruments to measure the quality of patient counselling  
34 [dissertation]. University of Kuopio. 2005. <http://urn.fi/URN:ISBN:951-27-0053-0> (accessed 20 Dec  
35 2018).  
36  
37 49 Council Directive 92/27/EEC of 31 March 1992 on the labelling of medicinal products for human  
38 use and on package leaflets. Council of the European Communities. 1992.  
39 <http://data.europa.eu/eli/dir/1992/27/oj> (accessed 23 Aug 2018).  
40  
41 50 Finnish Medicine Agency Fimea. SmPCs and PLs.  
42 [www.fimea.fi/web/en/databases\\_and\\_registeries/spcs](http://www.fimea.fi/web/en/databases_and_registeries/spcs) (accessed 21 Jun 2018).  
43  
44 51 Pharmaceutical Information Centre. Package leaflets of medicinal products. Finnish.  
45 <https://laakeinfo.fi/Frontpage.aspx> (accessed 21 Jun 2018).  
46  
47 52 Helldán A, Helakorpi S, editors. Health behaviour and health among the Finnish adult population,  
48 Spring 2014. National Institute for Health and Welfare. 2015. [http://urn.fi/URN:ISBN:978-952-302-  
49 447-2](http://urn.fi/URN:ISBN:978-952-302-447-2) (accessed 23 Aug 2018).  
50  
51 53 Puska P, Vartiainen E, Nissinen A, et al. Background, principles, implementation, and general  
52 experiences of the North Karelia Project. *Glob Heart* 2016;11:173–8.  
53 doi:10.1016/j.ghheart.2016.04.010 (accessed 11 Dec 2018).  
54  
55 54 Population Register Centre. <https://vrk.fi/en/population-register-centre> (accessed 20 Dec 2018).  
56  
57  
58  
59  
60

- 1  
2  
3 55 Tolonen H, Helakorpi S, Talala K, et al. 25-year trends and socio-demographic differences in  
4 response rates: Finnish adult health behaviour survey. *Eur J Epidemiol* 2006;21:409–15.  
5 doi:10.1007/s10654-006-9019-8 [published Online First: 28 June 2006].  
6
- 7 56 Gama H, Correia S, Lunet N. Questionnaire design and the recall of pharmacological treatments.  
8 *Pharmacoepidemiol Drug Saf* 2009;18:175-87. doi:10.1002/pds.1703 [published Online First: 30  
9 December 2008].  
10
- 11 57 Airaksinen M. Customer feedback as a tool for improving pharmacy services in Finland  
12 [dissertation]. University of Kuopio. 1996.  
13
- 14 58 Airaksinen M, Ahonen R, Enlund H. The questions to ask about your medicines campaign — An  
15 evaluation of pharmacists and the public's response. *Med Care* 1998;36:422–7.  
16
- 17 59 Vainio K, Airaksinen M, Väisänen T, et al. Assessing the importance of community pharmacists as  
18 providers of drug information. *J Appl Ther Res* 2004;5:24–9.  
19
- 20 60 Finnish National Advisory Board on Research Ethics. Ethical principles of research in the  
21 humanities and social and behavioural sciences and proposals for ethical review. 2009.  
22 www.tenk.fi/sites/tenk.fi/files/ethicalprinciples.pdf (accessed 21 Jun 2018).  
23
- 24 61 Guy Jr GP, Richardson LC. Visit duration for outpatient physician office visits among patients  
25 with cancer. *J Oncol Pract* 2012;8:2–8s. doi:10.1200/JOP.2011.000493 (accessed 1 Dec 2018).  
26
- 27 62 Kallio S, Kumpusalo-Vauhkonen A, Järvensivu T., et al. Towards interprofessional networking in  
28 medication management of the aged: current challenges and potential solutions in Finland. *Scand J*  
29 *Prim Health Care* 2016;34:368-76. doi:10.1080/02813432.2016.1249055 [published Online First: 8  
30 November 2016].  
31
- 32 63 Kangaspunta V, Koskela T, Soini E, et al. Factors impacting the perceived usefulness of a patient's  
33 health centre visit. *Suom Laakaril* 2014;69:1654–9.  
34
- 35 64 Shaw MK, Davis SA, Fleischer AB, et al. The duration of office visits in the United States, 1993 to  
36 2010. *Am J Manag Care* 2014;20:820–6.  
37
- 38 65 Statistics Finland. One half of Finnish residents participate in social network services.  
39 [https://www.stat.fi/til/sutivi/2014/sutivi\\_2014\\_2014-11-06\\_tie\\_001\\_en.html](https://www.stat.fi/til/sutivi/2014/sutivi_2014_2014-11-06_tie_001_en.html) (accessed 30 Nov 2018).  
40
- 41 66 Baruch Y, Holtom BC. Survey response rate levels and trends in organizational research. *Hum*  
42 *Relat* 2008;61:1139–60. doi:10.1177%2F0018726708094863 [published Online First: 1 August  
43 2008].  
44
- 45 67 Tolonen H, Helakorpi S, Talala K, et al. 25-year trends and socio-demographic differences in  
46 response rates: Finnish adult health behaviour survey. *Eur J Epidemiol* 2006;21:409–15.  
47 doi:10.1007/s10654-006-9019-8 [published Online First: 28 June 2006].  
48
- 49 68 Decree on the prescription of medicines 1088/2010.  
50 <https://www.finlex.fi/fi/laki/alkup/2010/20101088> (accessed 1 Dec 2018).  
51
- 52 69 Medicines Act 395/1987. <https://www.finlex.fi/fi/laki/ajantasa/1987/19870395> (accessed 1 Dec  
53 2018).  
54
- 55 70 European Commission. High Level Group on innovation and provision of medicines in the  
56 European Union: Recommendations for action. G10 Medicines report, European Communities. 2002.  
57 [http://ec.europa.eu/health/ph\\_overview/Documents/key08\\_en.pdf](http://ec.europa.eu/health/ph_overview/Documents/key08_en.pdf) (accessed 21 Jun 2018).  
58  
59  
60

## LEGENDS OF THE FIGURES

Figure 1 Trends in the receipt of medicines information among adult medicine users (n=18862) in 1999-2014 (% of the respondents who reported use of at least one prescription or non-prescription medicine within 7 days prior to the survey). The survey was not conducted in 2000, 2001, 2003, 2004, 2006 and 2007.

Figure 2 Number of medicines information sources from which the adult medicine users (n=18862) had received information on the medicines they used. The survey was not conducted in 2000, 2001, 2003, 2004, 2006 and 2007.

Figure 3 Ratio between mean number of medicines in use and mean number of diagnosed diseases compared to the mean number of medicines information sources from which the medicine users (n=18862) received medicines information. The survey was not conducted in 2000, 2001, 2003, 2004, 2006 and 2007.

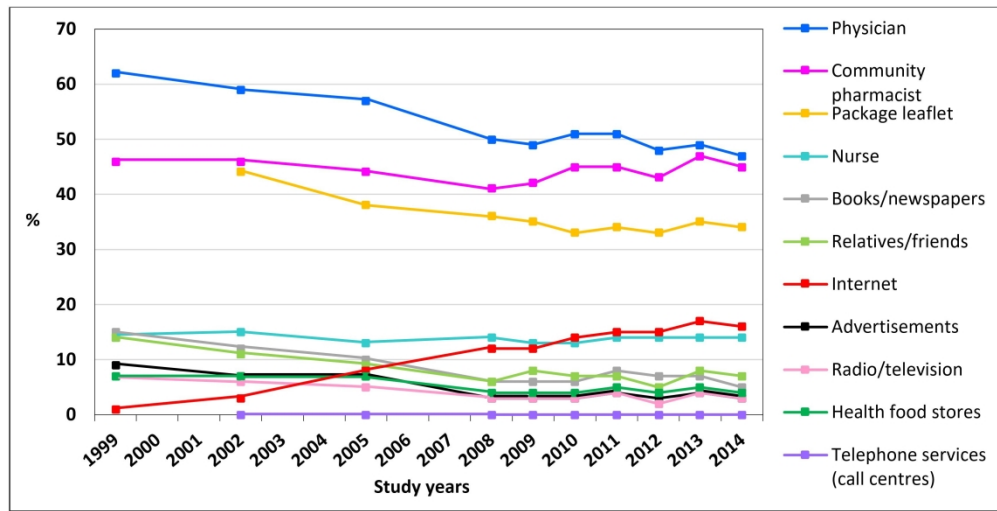

Figure 1 Trends in the receipt of medicines information among adult medicine users (n=18862) in 1999-2014 (% of the respondents who reported use of at least one prescription or non-prescription medicine within 7 days prior to the survey). The survey was not conducted in 2000, 2001, 2003, 2004, 2006 and 2007.



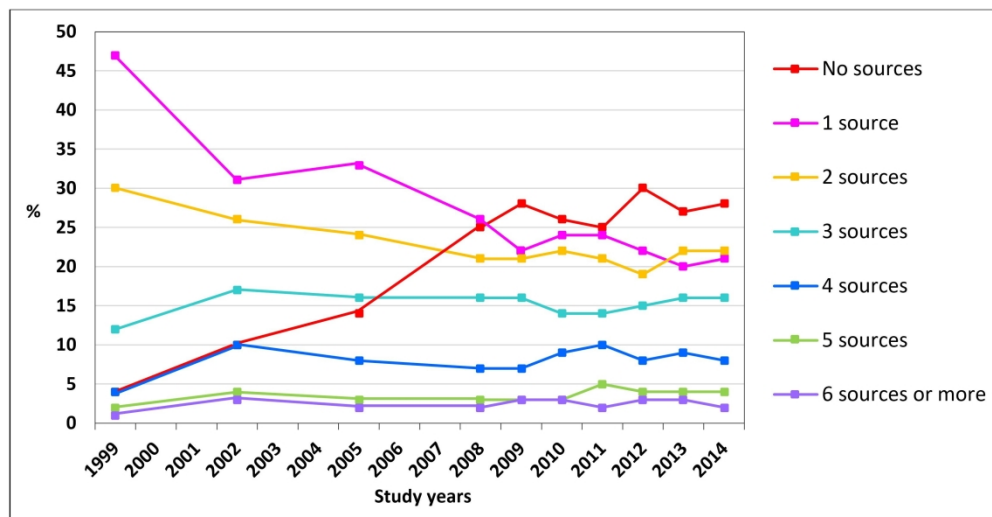

Figure 2 Number of medicines information sources from which the adult medicine users (n=18862) had received information on the medicines they used. The survey was not conducted in 2000, 2001, 2003, 2004, 2006 and 2007.

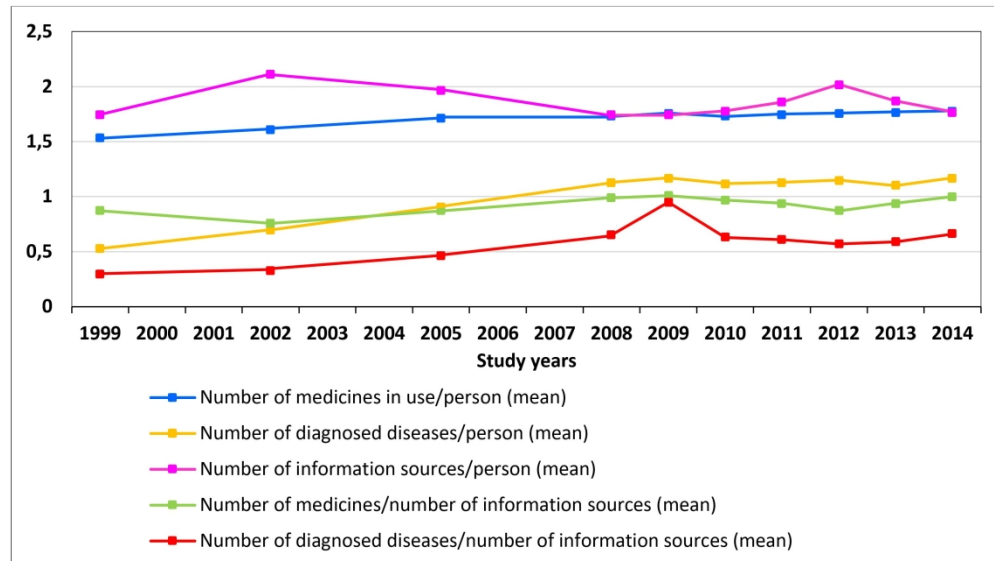

Figure 3 Ratio between mean number of medicines in use and mean number of diagnosed diseases compared to the mean number of medicines information sources from which the medicine users (n=18862) received medicines information. The survey was not conducted in 2000, 2001, 2003, 2004, 2006 and 2007.

**Appendix A.** Trends in the receipt of medicines information among medicine users by gender and age. The percentages are calculated from the variables within each subcategory (e.g. gender, age)<sup>a</sup>.

| Characteristics                   | Total <sup>b</sup><br>n (%) | Study years   |               |               |               |               |               |               |               |               |               |
|-----------------------------------|-----------------------------|---------------|---------------|---------------|---------------|---------------|---------------|---------------|---------------|---------------|---------------|
|                                   |                             | 1999<br>n (%) | 2002<br>n (%) | 2005<br>n (%) | 2008<br>n (%) | 2009<br>n (%) | 2010<br>n (%) | 2011<br>n (%) | 2012<br>n (%) | 2013<br>n (%) | 2014<br>n (%) |
| Respondents using medicines       | 18862                       | 1944          | 2000          | 2038          | 2101          | 1957          | 1871          | 1844          | 1759          | 1677          | 1671          |
| <b>Gender</b>                     |                             |               |               |               |               |               |               |               |               |               |               |
| Female                            | 11859 (63)                  | 1217 (63)     | 1278 (64)     | 1258 (62)     | 1332 (63)     | 1235 (63)     | 1181 (63)     | 1128 (61)     | 1101 (63)     | 1061 (63)     | 1068 (64)     |
| Physician                         | 6345 (54)                   | 798 (66)      | 779 (61)      | 738 (59)      | 663 (50)      | 616 (50)      | 596 (50)      | 578 (51)      | 529 (48)      | 537 (51)      | 511 (48)      |
| Community pharmacist              | 5673 (48)                   | 617 (51)      | 616 (48)      | 591 (47)      | 595 (45)      | 548 (44)      | 563 (48)      | 561 (50)      | 523 (48)      | 554 (52)      | 505 (47)      |
| Package leaflet                   | 4332 (41)                   | -             | 615 (48)      | 539 (43)      | 527 (40)      | 494 (40)      | 462 (39)      | 439 (39)      | 411 (37)      | 437 (41)      | 408 (38)      |
| Nurse                             | 1687 (14)                   | 187 (15)      | 183 (14)      | 159 (13)      | 195 (15)      | 173 (14)      | 157 (13)      | 158 (14)      | 168 (15)      | 155 (15)      | 152 (14)      |
| Books/newspapers                  | 1201 (10)                   | 226 (19)      | 198 (15)      | 162 (13)      | 95 (7)        | 92 (7)        | 83 (7)        | 109 (10)      | 74 (7)        | 85 (8)        | 77 (7)        |
| Relatives/friends                 | 1078 (9)                    | 160 (13)      | 143 (11)      | 121 (10)      | 92 (7)        | 113 (9)       | 89 (8)        | 111 (10)      | 82 (7)        | 90 (8)        | 77 (7)        |
| Internet                          | 1500 (13)                   | 19 (2)        | 47 (4)        | 99 (8)        | 178 (13)      | 178 (14)      | 189 (16)      | 195 (17)      | 192 (17)      | 212 (20)      | 191 (18)      |
| Advertisements                    | 621 (5)                     | 123 (10)      | 100 (8)       | 101 (8)       | 42 (3)        | 48 (4)        | 37 (3)        | 60 (5)        | 33 (3)        | 45 (4)        | 32 (3)        |
| Radio/television                  | 496 (4)                     | 71 (6)        | 80 (6)        | 69 (5)        | 35 (3)        | 38 (3)        | 42 (4)        | 62 (5)        | 34 (3)        | 38 (4)        | 27 (3)        |
| Health food stores                | 803 (7)                     | 119 (10)      | 121 (9)       | 108 (9)       | 67 (5)        | 69 (6)        | 64 (5)        | 73 (6)        | 57 (5)        | 68 (6)        | 57 (5)        |
| Telephone services (call centres) | 34 (<1)                     | -             | 4 (<1)        | 5 (<1)        | 4 (<1)        | 7 (<1)        | 1 (<1)        | 3 (<1)        | 3 (<1)        | 3 (<1)        | 4 (<1)        |
| No medicines information sources  | 2190 (18)                   | 33 (3)        | 97 (8)        | 133 (11)      | 309 (23)      | 307 (25)      | 282 (24)      | 234 (21)      | 299 (27)      | 229 (22)      | 267 (25)      |
| Male                              | 7003 (37)                   | 727 (37)      | 722 (36)      | 780 (38)      | 769 (37)      | 722 (37)      | 690 (37)      | 716 (39)      | 658 (37)      | 616 (37)      | 603 (36)      |
| Physician                         | 3526 (50)                   | 408 (56)      | 407 (56)      | 415 (53)      | 387 (50)      | 334 (46)      | 357 (52)      | 355 (50)      | 310 (47)      | 279 (45)      | 274 (45)      |
| Community pharmacist              | 2684 (38)                   | 275 (37)      | 296 (41)      | 310 (40)      | 266 (35)      | 264 (37)      | 279 (40)      | 264 (37)      | 237 (36)      | 239 (39)      | 254 (42)      |
| Package leaflet                   | 1712 (27)                   | -             | 261 (36)      | 243 (31)      | 218 (28)      | 191 (26)      | 158 (23)      | 179 (25)      | 161 (24)      | 143 (23)      | 158 (26)      |
| Nurse                             | 910 (13)                    | 87 (12)       | 124 (17)      | 95 (12)       | 102 (13)      | 84 (12)       | 86 (12)       | 100 (14)      | 79 (11)       | 77 (13)       | 76 (13)       |
| Books/newspapers                  | 315 (4)                     | 66 (9)        | 49 (7)        | 41 (5)        | 30 (4)        | 20 (3)        | 21 (3)        | 28 (4)        | 20 (3)        | 26 (4)        | 14 (2)        |
| Relatives/friends                 | 507 (7)                     | 109 (15)      | 70 (10)       | 63 (8)        | 35 (5)        | 47 (7)        | 41 (6)        | 34 (5)        | 38 (6)        | 35 (6)        | 35 (6)        |
| Internet                          | 651 (9)                     | 7 (1)         | 21 (3)        | 58 (7)        | 65 (8)        | 65 (9)        | 72 (10)       | 81 (11)       | 75 (11)       | 71 (12)       | 71 (12)       |
| Advertisements                    | 225 (3)                     | 57 (8)        | 35 (5)        | 36 (5)        | 24 (3)        | 9 (1)         | 14 (2)        | 9 (1)         | 17 (3)        | 15 (2)        | 9 (1)         |
| Radio/television                  | 251 (4)                     | 59 (8)        | 47 (7)        | 32 (4)        | 20 (3)        | 12 (2)        | 15 (2)        | 19 (3)        | 9 (1)         | 22 (4)        | 16 (3)        |
| Health food stores                | 186 (3)                     | 22 (3)        | 20 (3)        | 28 (4)        | 21 (3)        | 10 (1)        | 13 (2)        | 17 (2)        | 9 (1)         | 9 (1)         | 9 (1)         |
| Telephone services (call centres) | 4 (<1)                      | -             | 0 (0)         | 0 (0)         | 2 (<1)        | 0 (0)         | 0 (0)         | 1 (<1)        | 0 (0)         | 0 (0)         | 1 (<1)        |
| No medicines information sources  | 1806 (26)                   | 44 (6)        | 99 (14)       | 143 (18)      | 221 (29)      | 246 (34)      | 197 (29)      | 217 (30)      | 224 (34)      | 215 (35)      | 200 (33)      |
| <b>Age group (years)</b>          |                             |               |               |               |               |               |               |               |               |               |               |
| 15-24                             | 2535 (13)                   | 314 (16)      | 308 (15)      | 269 (13)      | 270 (13)      | 263 (13)      | 255 (14)      | 231 (13)      | 211 (12)      | 199 (12)      | 215 (13)      |
| Physician                         | 1077 (42)                   | 157 (50)      | 154 (50)      | 122 (45)      | 102 (38)      | 96 (37)       | 96 (38)       | 93 (40)       | 88 (42)       | 80 (40)       | 89 (41)       |
| Community pharmacist              | 933 (37)                    | 132 (42)      | 126 (41)      | 93 (35)       | 87 (32)       | 86 (33)       | 88 (35)       | 77 (33)       | 84 (40)       | 76 (38)       | 84 (39)       |
| Package leaflet                   | 911 (45)                    | -             | 183 (59)      | 131 (49)      | 106 (39)      | 98 (38)       | 89 (35)       | 66 (29)       | 80 (38)       | 78 (39)       | 80 (37)       |
| Nurse                             | 522 (21)                    | 65 (21)       | 73 (24)       | 48 (18)       | 54 (20)       | 55 (21)       | 51 (20)       | 44 (19)       | 48 (23)       | 41 (21)       | 43 (20)       |
| Books/newspapers                  | 199 (8)                     | 41 (13)       | 45 (15)       | 26 (10)       | 10 (4)        | 20 (8)        | 8 (3)         | 18 (8)        | 17 (8)        | 6 (3)         | 8 (4)         |
| Relatives/friends                 | 540 (21)                    | 110 (35)      | 76 (25)       | 60 (22)       | 48 (18)       | 52 (20)       | 40 (16)       | 50 (22)       | 40 (19)       | 29 (15)       | 35 (16)       |
| Internet                          | 323 (13)                    | 7 (2)         | 14 (5)        | 23 (9)        | 36 (13)       | 39 (15)       | 36 (14)       | 43 (19)       | 42 (20)       | 41 (21)       | 42 (20)       |
| Advertisements                    | 143 (6)                     | 31 (10)       | 26 (8)        | 30 (11)       | 9 (3)         | 12 (5)        | 9 (4)         | 8 (3)         | 7 (3)         | 5 (3)         | 6 (3)         |
| Radio/television                  | 129 (5)                     | 30 (10)       | 24 (8)        | 21 (8)        | 7 (3)         | 14 (5)        | 7 (3)         | 11 (5)        | 8 (4)         | 4 (2)         | 3 (1)         |
| Health food stores                | 66 (3)                      | 11 (4)        | 12 (4)        | 9 (3)         | 5 (2)         | 1 (<1)        | 4 (2)         | 5 (2)         | 7 (3)         | 7 (4)         | 5 (2)         |
| Telephone services (call centres) | 6 (<1)                      | -             | 3 (1)         | 0 (0)         | 0 (0)         | 1 (<1)        | 0 (0)         | 0 (0)         | 0 (0)         | 1 (1)         | 1 (<1)        |
| No medicines information sources  | 657 (26)                    | 16 (5)        | 37 (12)       | 46 (17)       | 85 (31)       | 94 (36)       | 89 (35)       | 74 (32)       | 75 (36)       | 72 (36)       | 69 (32)       |

|    |                                   |           |          |          |          |          |          |          |          |          |          |          |
|----|-----------------------------------|-----------|----------|----------|----------|----------|----------|----------|----------|----------|----------|----------|
| 1  | 25-34                             | 2798 (15) | 331 (17) | 308 (15) | 302 (15) | 305 (15) | 287 (15) | 258 (14) | 277 (15) | 251 (14) | 240 (14) | 239 (14) |
| 2  | Physician                         | 1305 (47) | 176 (53) | 152 (46) | 139 (46) | 144 (47) | 136 (48) | 119 (46) | 127 (46) | 108 (43) | 116 (48) | 88 (37)  |
| 3  | Community pharmacist              | 1333 (48) | 183 (55) | 141 (43) | 137 (45) | 140 (46) | 122 (43) | 126 (49) | 136 (49) | 116 (46) | 115 (48) | 117 (49) |
| 4  | Package leaflet                   | 1024 (42) | -        | 160 (48) | 132 (44) | 129 (42) | 119 (42) | 100 (39) | 107 (39) | 101 (40) | 89 (37)  | 87 (36)  |
| 5  | Nurse                             | 470 (17)  | 59 (17)  | 48 (15)  | 41 (14)  | 42 (14)  | 40 (14)  | 32 (12)  | 36 (13)  | 32 (13)  | 42 (18)  | 30 (13)  |
| 6  | Books/newspapers                  | 191 (7)   | 47 (14)  | 34 (10)  | 29 (10)  | 14 (5)   | 12 (4)   | 10 (4)   | 12 (4)   | 11 (4)   | 9 (4)    | 13 (5)   |
| 7  | Relatives/friends                 | 329 (12)  | 57 (17)  | 38 (11)  | 51 (17)  | 23 (8)   | 28 (10)  | 25 (10)  | 38 (14)  | 17 (7)   | 33 (14)  | 19 (8)   |
| 8  | Internet                          | 415 (15)  | 5 (2)    | 20 (6)   | 31 (10)  | 45 (15)  | 52 (18)  | 49 (19)  | 56 (20)  | 48 (19)  | 60 (25)  | 49 (21)  |
| 9  | Advertisements                    | 137 (5)   | 31 (9)   | 29 (9)   | 28 (9)   | 8 (3)    | 8 (3)    | 9 (3)    | 7 (3)    | 6 (2)    | 6 (3)    | 5 (2)    |
| 10 | Radio/television                  | 117 (4)   | 31 (9)   | 23 (7)   | 23 (8)   | 4 (1)    | 9 (3)    | 8 (3)    | 5 (2)    | 5 (2)    | 3 (1)    | 6 (3)    |
| 11 | Health food stores                | 141 (5)   | 16 (5)   | 16 (5)   | 28 (9)   | 12 (4)   | 13 (5)   | 6 (2)    | 10 (4)   | 9 (4)    | 13 (5)   | 8 (3)    |
| 12 | Telephone services (call centres) | 13 (1)    | -        | 0 (0)    | 3 (1)    | 1 (<1)   | 1 (<1)   | 0 (0)    | 1 (<1)   | 2 (1)    | 1 (<1)   | 4 (2)    |
| 13 | No medicines information sources  | 736 (26)  | 15 (5)   | 35 (11)  | 54 (18)  | 85 (28)  | 95 (33)  | 74 (29)  | 89 (32)  | 84 (33)  | 67 (28)  | 78 (32)  |
| 14 | 35-44                             | 3409 (18) | 419 (22) | 411 (21) | 394 (19) | 376 (19) | 335 (17) | 304 (16) | 318 (17) | 292 (17) | 275 (16) | 285 (17) |
| 15 | Physician                         | 1609 (47) | 220 (55) | 221 (54) | 200 (51) | 164 (44) | 146 (44) | 145 (48) | 145 (46) | 127 (43) | 121 (44) | 120 (42) |
| 16 | Community pharmacist              | 1568 (46) | 230 (55) | 213 (52) | 183 (47) | 165 (44) | 132 (39) | 141 (47) | 130 (41) | 119 (41) | 134 (49) | 121 (43) |
| 17 | Package leaflet                   | 1130 (38) | -        | 182 (44) | 181 (46) | 141 (38) | 122 (37) | 96 (32)  | 112 (35) | 105 (36) | 105 (38) | 86 (30)  |
| 18 | Nurse                             | 380 (11)  | 40 (10)  | 46 (11)  | 41 (10)  | 46 (12)  | 44 (13)  | 29 (10)  | 34 (11)  | 37 (13)  | 26 (9)   | 37 (13)  |
| 19 | Books/newspapers                  | 274 (8)   | 77 (18)  | 57 (14)  | 33 (8)   | 24 (6)   | 16 (5)   | 12 (4)   | 19 (6)   | 10 (3)   | 14 (5)   | 12 (4)   |
| 20 | Relatives/friends                 | 239 (7)   | 37 (9)   | 35 (9)   | 24 (6)   | 29 (8)   | 25 (7)   | 21 (7)   | 15 (5)   | 21 (7)   | 16 (6)   | 16 (6)   |
| 21 | Internet                          | 381 (11)  | 9 (2)    | 17 (4)   | 43 (11)  | 54 (14)  | 44 (13)  | 45 (15)  | 42 (13)  | 37 (13)  | 54 (20)  | 36 (13)  |
| 22 | Advertisements                    | 188 (6)   | 61 (15)  | 33 (8)   | 26 (7)   | 18 (5)   | 6 (2)    | 7 (2)    | 7 (2)    | 9 (3)    | 7 (3)    | 14 (5)   |
| 23 | Radio/television                  | 134 (4)   | 34 (8)   | 31 (8)   | 13 (3)   | 11 (3)   | 3 (1)    | 7 (2)    | 12 (4)   | 6 (2)    | 9 (3)    | 8 (3)    |
| 24 | Health food stores                | 196 (6)   | 41 (10)  | 39 (9)   | 25 (6)   | 19 (5)   | 10 (3)   | 15 (5)   | 13 (4)   | 13 (4)   | 12 (4)   | 9 (3)    |
| 25 | Telephone services (call centres) | 9 (<1)    | -        | 1 (<1)   | 0 (0)    | 3 (1)    | 2 (1)    | 0 (0)    | 2 (<1)   | 1 (<1)   | 0 (0)    | 0 (0)    |
| 26 | No medicines information sources  | 893 (26)  | 19 (5)   | 45 (11)  | 60 (15)  | 106 (28) | 103 (31) | 94 (31)  | 97 (31)  | 97 (33)  | 85 (31)  | 97 (34)  |
| 27 | 45-54                             | 4558 (24) | 481 (25) | 486 (24) | 491 (24) | 490 (23) | 460 (24) | 484 (26) | 438 (24) | 430 (24) | 411 (25) | 387 (23) |
| 28 | Physician                         | 2539 (56) | 342 (71) | 314 (65) | 297 (60) | 275 (56) | 232 (50) | 237 (49) | 229 (52) | 210 (49) | 200 (49) | 203 (52) |
| 29 | Community pharmacist              | 2101 (46) | 210 (44) | 218 (45) | 227 (46) | 201 (41) | 203 (44) | 231 (48) | 216 (49) | 196 (46) | 196 (48) | 187 (48) |
| 30 | Package leaflet                   | 1453 (36) | -        | 185 (38) | 181 (37) | 176 (36) | 169 (37) | 163 (34) | 160 (37) | 136 (32) | 145 (35) | 138 (36) |
| 31 | Nurse                             | 544 (12)  | 59 (12)  | 65 (13)  | 53 (11)  | 72 (15)  | 47 (10)  | 46 (10)  | 59 (13)  | 48 (11)  | 53 (13)  | 42 (11)  |
| 32 | Books/newspapers                  | 410 (9)   | 81 (17)  | 60 (12)  | 57 (12)  | 40 (8)   | 32 (7)   | 32 (5)   | 38 (9)   | 20 (5)   | 33 (8)   | 17 (4)   |
| 33 | Relatives/friends                 | 236 (5)   | 37 (8)   | 31 (6)   | 21 (4)   | 18 (4)   | 31 (7)   | 24 (5)   | 18 (4)   | 20 (5)   | 21 (5)   | 15 (4)   |
| 34 | Internet                          | 481 (11)  | 3 (1)    | 12 (2)   | 38 (8)   | 61 (12)  | 58 (13)  | 63 (13)  | 68 (16)  | 58 (13)  | 60 (15)  | 60 (16)  |
| 35 | Advertisements                    | 199 (4)   | 32 (7)   | 31 (6)   | 30 (6)   | 17 (3)   | 16 (3)   | 15 (3)   | 20 (5)   | 14 (3)   | 18 (4)   | 6 (2)    |
| 36 | Radio/television                  | 156 (3)   | 22 (5)   | 26 (5)   | 15 (3)   | 17 (3)   | 13 (3)   | 10 (2)   | 17 (4)   | 10 (2)   | 20 (5)   | 6 (2)    |
| 37 | Health food stores                | 251 (6)   | 43 (9)   | 38 (8)   | 29 (6)   | 10 (2)   | 28 (6)   | 22 (5)   | 32 (7)   | 13 (3)   | 20 (5)   | 16 (4)   |
| 38 | Telephone services (call centres) | 5 (<1)    | -        | 0 (0)    | 0 (0)    | 1 (<1)   | 2 (<1)   | 1 (<1)   | 0 (0)    | 0 (0)    | 1 (<1)   | 0 (0)    |
| 39 | No medicines information sources  | 932 (20)  | 15 (3)   | 40 (8)   | 56 (11)  | 107 (22) | 107 (23) | 120 (25) | 97 (22)  | 125 (29) | 104 (25) | 100 (26) |
| 40 | 55-64                             | 5562 (29) | 399 (21) | 487 (24) | 582 (29) | 660 (31) | 612 (31) | 570 (30) | 580 (31) | 575 (33) | 552 (33) | 545 (33) |
| 41 | Physician                         | 3341 (60) | 311 (78) | 345 (71) | 395 (68) | 365 (55) | 340 (56) | 356 (62) | 339 (58) | 306 (53) | 299 (54) | 285 (52) |
| 42 | Community pharmacist              | 2438 (44) | 137 (34) | 214 (44) | 261 (45) | 268 (41) | 269 (44) | 256 (45) | 266 (46) | 245 (43) | 272 (49) | 250 (46) |
| 43 | Package leaflet                   | 1526 (30) | -        | 166 (34) | 157 (27) | 193 (29) | 177 (29) | 172 (30) | 173 (30) | 150 (26) | 163 (30) | 175 (32) |
| 44 | Nurse                             | 749 (13)  | 51 (13)  | 75 (15)  | 71 (12)  | 83 (13)  | 71 (12)  | 85 (15)  | 85 (15)  | 82 (14)  | 70 (13)  | 76 (14)  |
| 45 | Books/newspapers                  | 442 (8)   | 46 (12)  | 51 (10)  | 58 (10)  | 37 (6)   | 32 (5)   | 42 (7)   | 50 (9)   | 36 (6)   | 49 (9)   | 41 (8)   |
| 46 | Relatives/friends                 | 241 (4)   | 28 (7)   | 33 (7)   | 28 (5)   | 9 (1)    | 24 (4)   | 20 (4)   | 24 (4)   | 22 (4)   | 26 (5)   | 27 (5)   |
| 47 | Internet                          | 449 (8)   | 2 (1)    | 5 (1)    | 22 (4)   | 47 (7)   | 50 (8)   | 68 (12)  | 67 (12)  | 82 (14)  | 68 (12)  | 75 (14)  |
| 48 | Advertisements                    | 180 (3)   | 25 (6)   | 16 (3)   | 23 (4)   | 14 (7)   | 15 (2)   | 12 (2)   | 27 (5)   | 14 (2)   | 24 (4)   | 10 (2)   |
| 49 | Radio/television                  | 211 (4)   | 13 (3)   | 23 (5)   | 29 (5)   | 16 (2)   | 11 (2)   | 25 (4)   | 36 (6)   | 14 (2)   | 24 (4)   | 20 (4)   |
| 50 | Health food stores                | 329 (6)   | 30 (8)   | 36 (7)   | 45 (8)   | 42 (6)   | 27 (4)   | 30 (5)   | 42 (6)   | 24 (4)   | 25 (5)   | 28 (5)   |
| 51 | Telephone services (call centres) | 5 (<1)    | -        | 0 (0)    | 2 (<1)   | 1 (<1)   | 1 (1)    | 0 (0)    | 1 (<1)   | 0 (0)    | 0 (0)    | 0 (0)    |
| 52 | No medicines information sources  | 1072 (19) | 12 (3)   | 39 (8)   | 60 (10)  | 147 (22) | 154 (25) | 102 (18) | 155 (27) | 142 (25) | 116 (21) | 123 (23) |

<sup>a</sup>Discrepancies in totals are due to rounding errors, <sup>b</sup>Calculated from study years available.

**Appendix B.** Trends in the receipt of medicines information among medicine users (n=18862) by number of medicines in use and number of diagnosed diseases. The percentages are calculated from the variables within each subcategory (e.g. number of medicines in use, number of diagnosed diseases)<sup>a</sup>.

| Characteristics                   | Total <sup>b</sup><br>n (%) | Study years   |               |               |               |               |               |               |               |               |               |
|-----------------------------------|-----------------------------|---------------|---------------|---------------|---------------|---------------|---------------|---------------|---------------|---------------|---------------|
|                                   |                             | 1999<br>n (%) | 2002<br>n (%) | 2005<br>n (%) | 2008<br>n (%) | 2009<br>n (%) | 2010<br>n (%) | 2011<br>n (%) | 2012<br>n (%) | 2013<br>n (%) | 2014<br>n (%) |
| Respondents using medicines       | 18862                       | 1944          | 2000          | 2038          | 2101          | 1957          | 1871          | 1844          | 1759          | 1677          | 1671          |
| Number of medicines in use/person |                             |               |               |               |               |               |               |               |               |               |               |
| 1 medicine                        | 10558 (56)                  | 1215 (63)     | 1183 (59)     | 1143 (56)     | 1154 (55)     | 1060 (54)     | 1029 (55)     | 1011 (55)     | 946 (54)      | 907 (54)      | 910 (54)      |
| Physician                         | 4449 (42)                   | 628 (52)      | 559 (47)      | 508 (44)      | 465 (40)      | 410 (39)      | 414 (40)      | 410 (41)      | 344 (36)      | 366 (40)      | 345 (38)      |
| Community pharmacist              | 3992 (38)                   | 540 (44)      | 461 (39)      | 408 (36)      | 405 (35)      | 369 (35)      | 386 (38)      | 375 (37)      | 333 (35)      | 368 (41)      | 347 (38)      |
| Package leaflet                   | 2952 (32)                   | -             | 478 (40)      | 401 (35)      | 354 (31)      | 317 (30)      | 293 (28)      | 312 (31)      | 261 (28)      | 278 (31)      | 258 (28)      |
| Nurse                             | 1056 (10)                   | 138 (11)      | 124 (10)      | 104 (9)       | 129 (11)      | 103 (10)      | 84 (8)        | 104 (10)      | 90 (10)       | 92 (10)       | 88 (10)       |
| Books/newspapers                  | 719 (7)                     | 184 (15)      | 124 (10)      | 92 (8)        | 48 (4)        | 43 (4)        | 43 (4)        | 62 (6)        | 39 (4)        | 45 (5)        | 39 (4)        |
| Relatives/friends                 | 823 (8)                     | 168 (14)      | 113 (10)      | 94 (8)        | 70 (6)        | 76 (7)        | 64 (6)        | 78 (8)        | 55 (6)        | 56 (6)        | 48 (5)        |
| Internet                          | 887 (8)                     | 10 (1)        | 37 (3)        | 78 (7)        | 99 (9)        | 90 (8)        | 114 (11)      | 120 (12)      | 105 (11)      | 117 (13)      | 117 (13)      |
| Advertisements                    | 497 (5)                     | 127 (10)      | 86 (7)        | 74 (6)        | 38 (3)        | 28 (3)        | 36 (4)        | 36 (4)        | 26 (3)        | 26 (3)        | 26 (3)        |
| Radio/television                  | 373 (4)                     | 88 (7)        | 67 (6)        | 48 (4)        | 26 (2)        | 20 (2)        | 30 (3)        | 37 (4)        | 16 (2)        | 27 (3)        | 14 (2)        |
| Health food stores                | 477 (5)                     | 77 (6)        | 71 (6)        | 60 (5)        | 36 (3)        | 41 (4)        | 44 (4)        | 46 (5)        | 28 (3)        | 39 (4)        | 35 (4)        |
| Telephone services (call centres) | 20 (<1)                     | -             | 4 (<1)        | 2 (<1)        | 3 (<1)        | 3 (<1)        | 1 (<1)        | 2 (<1)        | 2 (<1)        | 0 (0)         | 3 (<1)        |
| No medicines information sources  | 2851 (27)                   | 68 (6)        | 164 (14)      | 219 (19)      | 386 (33)      | 379 (36)      | 338 (33)      | 322 (32)      | 363 (38)      | 292 (32)      | 320 (35)      |
| 2 medicines                       | 5116 (27)                   | 505 (26)      | 559 (28)      | 566 (28)      | 584 (28)      | 536 (27)      | 512 (27)      | 491 (27)      | 492 (28)      | 442 (26)      | 429 (26)      |
| Physician                         | 3107 (61)                   | 386 (76)      | 396 (71)      | 371 (66)      | 336 (58)      | 297 (55)      | 299 (58)      | 278 (57)      | 284 (58)      | 236 (53)      | 224 (52)      |
| Community pharmacist              | 2482 (49)                   | 237 (47)      | 299 (53)      | 290 (51)      | 256 (44)      | 235 (44)      | 247 (48)      | 245 (50)      | 238 (48)      | 224 (51)      | 211 (49)      |
| Package leaflet                   | 1769 (38)                   | -             | 270 (48)      | 225 (40)      | 231 (40)      | 205 (38)      | 189 (37)      | 168 (34)      | 172 (35)      | 158 (36)      | 151 (35)      |
| Nurse                             | 794 (16)                    | 94 (19)       | 117 (21)      | 84 (15)       | 90 (15)       | 72 (13)       | 68 (13)       | 72 (15)       | 76 (15)       | 59 (13)       | 62 (14)       |
| Books/newspapers                  | 468 (9)                     | 73 (14)       | 83 (15)       | 62 (11)       | 39 (7)        | 38 (7)        | 31 (6)        | 35 (7)        | 30 (6)        | 45 (5)        | 32 (7)        |
| Relatives/friends                 | 488 (10)                    | 75 (15)       | 66 (12)       | 62 (11)       | 38 (7)        | 54 (10)       | 45 (9)        | 42 (9)        | 39 (8)        | 38 (9)        | 29 (7)        |
| Internet                          | 671 (13)                    | 7 (1)         | 25 (4)        | 46 (8)        | 85 (15)       | 81 (15)       | 81 (16)       | 83 (17)       | 90 (18)       | 90 (20)       | 83 (19)       |
| Advertisements                    | 224 (4)                     | 40 (8)        | 34 (6)        | 43 (8)        | 17 (3)        | 17 (3)        | 14 (3)        | 16 (3)        | 14 (3)        | 19 (4)        | 10 (2)        |
| Radio/television                  | 201 (4)                     | 23 (5)        | 37 (7)        | 28 (5)        | 16 (3)        | 17 (3)        | 16 (3)        | 21 (4)        | 16 (3)        | 16 (4)        | 11 (3)        |
| Health food stores                | 297 (6)                     | 38 (8)        | 48 (9)        | 51 (9)        | 31 (5)        | 18 (3)        | 22 (4)        | 27 (5)        | 23 (5)        | 22 (5)        | 17 (4)        |
| Telephone services (call centres) | 10 (<1)                     | -             | 0 (0)         | 1 (<1)        | 2 (<1)        | 2 (<1)        | 0 (0)         | 1 (<1)        | 1 (<1)        | 2 (<1)        | 1 (<1)        |
| No medicines information sources  | 801 (16)                    | 5 (1)         | 25 (4)        | 47 (8)        | 105 (18)      | 122 (23)      | 101 (20)      | 83 (17)       | 111 (23)      | 99 (22)       | 103 (24)      |
| 3 medicines                       | 1984 (11)                   | 161 (8)       | 166 (8)       | 198 (10)      | 221 (11)      | 220 (11)      | 210 (11)      | 210 (11)      | 191 (11)      | 208 (12)      | 199 (12)      |
| Physician                         | 1388 (70)                   | 133 (83)      | 139 (84)      | 158 (80)      | 147 (67)      | 140 (64)      | 149 (71)      | 150 (71)      | 116 (61)      | 134 (64)      | 122 (61)      |
| Community pharmacist              | 1101 (55)                   | 76 (47)       | 94 (57)       | 112 (57)      | 111 (50)      | 118 (54)      | 130 (62)      | 110 (52)      | 106 (55)      | 127 (61)      | 117 (59)      |
| Package leaflet                   | 797 (44)                    | -             | 83 (50)       | 88 (44)       | 97 (44)       | 90 (41)       | 87 (41)       | 80 (38)       | 77 (40)       | 100 (48)      | 95 (48)       |
| Nurse                             | 413 (21)                    | 28 (17)       | 41 (25)       | 33 (17)       | 37 (17)       | 45 (20)       | 57 (27)       | 44 (21)       | 40 (21)       | 42 (20)       | 46 (23)       |
| Books/newspapers                  | 197 (10)                    | 25 (16)       | 22 (13)       | 24 (12)       | 20 (9)        | 13 (6)        | 20 (10)       | 21 (10)       | 17 (9)        | 23 (11)       | 12 (6)        |
| Relatives/friends                 | 165 (8)                     | 14 (9)        | 26 (16)       | 15 (8)        | 10 (5)        | 10 (5)        | 16 (8)        | 14 (7)        | 20 (10)       | 19 (9)        | 21 (11)       |
| Internet                          | 311 (16)                    | 6 (4)         | 4 (2)         | 23 (12)       | 37 (17)       | 37 (17)       | 42 (20)       | 44 (21)       | 38 (20)       | 47 (23)       | 33 (17)       |
| Advertisements                    | 78 (4)                      | 8 (5)         | 13 (8)        | 12 (6)        | 5 (2)         | 5 (2)         | 6 (3)         | 11 (5)        | 6 (3)         | 9 (4)         | 3 (2)         |
| Radio/television                  | 93 (5)                      | 13 (8)        | 17 (10)       | 9 (5)         | 5 (2)         | 5 (2)         | 9 (4)         | 13 (6)        | 5 (3)         | 11 (5)        | 6 (3)         |
| Health food stores                | 103 (5)                     | 19 (12)       | 11 (7)        | 12 (6)        | 8 (4)         | 12 (5)        | 7 (3)         | 8 (4)         | 7 (4)         | 10 (5)        | 9 (5)         |
| Telephone services (call centres) | 4 (<1)                      | -             | 0 (0)         | 1 (1)         | 1 (<1)        | 0 (0)         | 0 (0)         | 1 (<1)        | 0 (0)         | 1 (<1)        | 0 (0)         |
| No medicines information sources  | 238 (12)                    | 4 (2)         | 4 (2)         | 9 (5)         | 28 (13)       | 39 (18)       | 26 (12)       | 33 (16)       | 34 (18)       | 36 (17)       | 25 (13)       |
| 4 medicines or more               | 1204 (6)                    | 63 (3)        | 92 (5)        | 131 (6)       | 142 (7)       | 141 (7)       | 120 (6)       | 132 (7)       | 130 (7)       | 120 (7)       | 133 (8)       |
| Physician                         | 913 (76)                    | 59 (94)       | 78 (85)       | 116 (89)      | 102 (72)      | 103 (73)      | 91 (76)       | 95 (72)       | 95 (72)       | 80 (67)       | 94 (71)       |
| Community pharmacist              | 780 (65)                    | 39 (62)       | 58 (63)       | 91 (69)       | 89 (63)       | 90 (64)       | 79 (66)       | 95 (72)       | 83 (63)       | 72 (60)       | 84 (63)       |
| Package leaflet                   | 526 (44)                    | -             | 45 (39)       | 68 (52)       | 63 (44)       | 73 (52)       | 51 (43)       | 58 (44)       | 62 (48)       | 44 (37)       | 62 (47)       |
| Nurse                             | 334 (28)                    | 14 (22)       | 25 (27)       | 33 (25)       | 41 (29)       | 37 (26)       | 34 (28)       | 38 (29)       | 41 (32)       | 39 (33)       | 32 (24)       |
| Books/newspapers                  | 148 (12)                    | 10 (16)       | 18 (20)       | 25 (19)       | 18 (13)       | 18 (13)       | 10 (8)        | 19 (14)       | 8 (6)         | 14 (12)       | 8 (6)         |
| Relatives/friends                 | 110 (9)                     | 12 (19)       | 8 (9)         | 13 (10)       | 9 (6)         | 20 (14)       | 5 (4)         | 11 (8)        | 6 (5)         | 12 (10)       | 14 (11)       |
| Internet                          | 217 (18)                    | 3 (5)         | 2 (2)         | 10 (8)        | 22 (15)       | 35 (25)       | 24 (20)       | 29 (22)       | 34 (26)       | 29 (24)       | 29 (22)       |
| Advertisements                    | 47 (4)                      | 5 (8)         | 2 (2)         | 8 (6)         | 6 (4)         | 7 (5)         | 2 (2)         | 6 (5)         | 4 (3)         | 5 (4)         | 2 (2)         |
| Radio/television                  | 80 (7)                      | 6 (10)        | 6 (7)         | 16 (12)       | 8 (6)         | 8 (6)         | 2 (2)         | 10 (8)        | 6 (5)         | 6 (5)         | 12 (9)        |

|    |                                                        |           |           |           |          |          |          |          |          |          |          |          |
|----|--------------------------------------------------------|-----------|-----------|-----------|----------|----------|----------|----------|----------|----------|----------|----------|
|    | Health food stores                                     | 84 (7)    | 7 (11)    | 11 (12)   | 13 (10)  | 13 (9)   | 8 (6)    | 4 (3)    | 9 (7)    | 8 (6)    | 6 (5)    | 5 (4)    |
|    | Telephone services (call centres)                      | 4 (<1)    | -         | 0 (0)     | 1 (1)    | 0 (0)    | 2 (1)    | 0 (0)    | 0 (0)    | 0 (0)    | 0 (0)    | 1 (1)    |
| 1  | No medicines information sources                       | 106 (9)   | 0 (0)     | 3 (5)     | 1 (1)    | 11 (8)   | 13 (9)   | 14 (12)  | 13 (10)  | 15 (12)  | 17 (14)  | 19 (14)  |
| 2  | <b>Number of diagnosed diseases/person<sup>c</sup></b> |           |           |           |          |          |          |          |          |          |          |          |
| 3  | None                                                   | 8660      | 1228 (63) | 1121 (56) | 971 (48) | 864 (41) | 787 (40) | 811 (43) | 754 (41) | 712 (41) | 723 (43) | 689 (41) |
| 4  | Physician                                              | 3418 (39) | 633 (52)  | 536 (48)  | 384 (40) | 286 (33) | 273 (35) | 300 (37) | 272 (36) | 249 (35) | 268 (36) | 217 (31) |
| 5  | Community pharmacist                                   | 3277 (38) | 558 (45)  | 470 (42)  | 371 (38) | 299 (35) | 258 (33) | 293 (36) | 267 (35) | 250 (35) | 275 (38) | 236 (34) |
| 6  | Package leaflet                                        | 2538 (34) | -         | 496 (44)  | 387 (40) | 282 (33) | 251 (32) | 246 (30) | 237 (31) | 202 (28) | 230 (32) | 207 (30) |
| 7  | Nurse                                                  | 909 (10)  | 157 (13)  | 146 (13)  | 91 (9)   | 88 (10)  | 67 (9)   | 80 (10)  | 71 (9)   | 70 (10)  | 75 (10)  | 64 (9)   |
| 8  | Books/newspapers                                       | 698 (8)   | 194 (16)  | 134 (12)  | 95 (10)  | 42 (5)   | 35 (4)   | 39 (5)   | 50 (7)   | 34 (5)   | 38 (5)   | 37 (5)   |
| 9  | Relatives/friends                                      | 851 (10)  | 196 (16)  | 135 (12)  | 117 (12) | 55 (6)   | 66 (8)   | 66 (8)   | 71 (9)   | 55 (8)   | 50 (7)   | 40 (6)   |
| 10 | Internet                                               | 744 (9)   | 15 (1)    | 38 (3)    | 65 (7)   | 77 (9)   | 71 (9)   | 99 (12)  | 93 (12)  | 84 (12)  | 109 (15) | 93 (13)  |
| 11 | Advertisements                                         | 488 (6)   | 141 (12)  | 88 (8)    | 81 (8)   | 35 (4)   | 21 (3)   | 25 (3)   | 30 (4)   | 19 (3)   | 24 (3)   | 24 (3)   |
| 12 | Radio/television                                       | 358 (4)   | 96 (8)    | 65 (6)    | 52 (5)   | 20 (2)   | 18 (2)   | 21 (3)   | 33 (4)   | 12 (2)   | 23 (3)   | 18 (3)   |
| 13 | Health food stores                                     | 446 (5)   | 85 (7)    | 84 (8)    | 72 (7)   | 37 (4)   | 22 (3)   | 34 (4)   | 31 (4)   | 17 (2)   | 35 (5)   | 29 (4)   |
| 14 | Telephone services (call centres)                      | 20 (<1)   | -         | 3 (<1)    | 4 (<1)   | 2 (<1)   | 2 (<1)   | 0 (0)    | 2 (<1)   | 2 (<1)   | 2 (<1)   | 3 (<1)   |
| 15 | No medicines information sources                       | 2337 (27) | 65 (5)    | 155 (14)  | 187 (19) | 311 (36) | 295 (37) | 272 (34) | 254 (34) | 283 (40) | 251 (35) | 264 (38) |
| 16 | <b>1 disease</b>                                       |           |           |           |          |          |          |          |          |          |          |          |
| 17 | Physician                                              | 5262      | 502 (26)  | 527 (26)  | 593 (29) | 616 (29) | 557 (29) | 492 (26) | 539 (29) | 521 (30) | 465 (28) | 450 (27) |
| 18 | Community pharmacist                                   | 3055 (58) | 389 (77)  | 364 (69)  | 394 (66) | 348 (57) | 290 (52) | 261 (53) | 276 (51) | 251 (48) | 245 (53) | 237 (53) |
| 19 | Community pharmacist                                   | 2342 (45) | 224 (45)  | 259 (49)  | 260 (44) | 241 (39) | 231 (42) | 221 (45) | 245 (45) | 218 (42) | 231 (50) | 212 (47) |
| 20 | Package leaflet                                        | 1620 (34) | -         | 228 (43)  | 202 (34) | 205 (33) | -        | 197 (35) | 156 (32) | 168 (31) | 156 (30) | 169 (36) |
| 21 | Nurse                                                  | 699 (13)  | 70 (14)   | 81 (15)   | 68 (12)  | 90 (15)  | 84 (15)  | 53 (11)  | 68 (13)  | 69 (13)  | 57 (12)  | 59 (13)  |
| 22 | Books/newspapers                                       | 410 (8)   | 75 (15)   | 66 (13)   | 54 (9)   | 33 (5)   | 34 (6)   | 25 (5)   | 41 (8)   | 27 (5)   | 36 (8)   | 19 (4)   |
| 23 | Relatives/friends                                      | 386 (7)   | 53 (11)   | 56 (11)   | 32 (5)   | 37 (6)   | 46 (8)   | 36 (7)   | 38 (7)   | 30 (6)   | 34 (7)   | 24 (5)   |
| 24 | Internet                                               | 591 (11)  | 8 (2)     | 19 (4)    | 49 (8)   | 78 (13)  | 68 (12)  | 67 (14)  | 68 (13)  | 73 (14)  | 95 (20)  | 66 (15)  |
| 25 | Advertisements                                         | 200 (4)   | 32 (6)    | 30 (6)    | 35 (6)   | 11 (2)   | 18 (3)   | 13 (3)   | 16 (3)   | 14 (3)   | 20 (4)   | 11 (2)   |
| 26 | Radio/television                                       | 190 (4)   | 22 (4)    | 42 (8)    | 24 (4)   | 12 (2)   | 11 (2)   | 16 (3)   | 18 (3)   | 18 (3)   | 20 (4)   | 7 (2)    |
| 27 | Health food stores                                     | 268 (5)   | 44 (9)    | 36 (7)    | 30 (5)   | 18 (3)   | 28 (5)   | 17 (3)   | 28 (5)   | 25 (5)   | 23 (5)   | 19 (4)   |
| 28 | Telephone services (call centres)                      | 8 (<1)    | -         | 0 (0)     | 0 (0)    | 2 (<1)   | 2 (<1)   | 1 (<1)   | 0 (0)    | 1 (<1)   | 1 (<1)   | 1 (<1)   |
| 29 | No medicines information sources                       | 1010 (19) | 11 (2)    | 26 (5)    | 65 (11)  | 138 (22) | 153 (27) | 124 (25) | 118 (22) | 153 (29) | 110 (24) | 112 (25) |
| 30 | <b>2 diseases</b>                                      |           |           |           |          |          |          |          |          |          |          |          |
| 31 | Physician                                              | 2900      | 151 (8)   | 232 (12)  | 270 (13) | 368 (18) | 350 (18) | 331 (18) | 337 (18) | 296 (17) | 280 (17) | 285 (17) |
| 32 | Physician                                              | 1930 (67) | 126 (83)  | 183 (79)  | 203 (75) | 240 (65) | 208 (59) | 224 (68) | 229 (68) | 193 (64) | 161 (58) | 163 (57) |
| 33 | Community pharmacist                                   | 1506 (52) | 79 (52)   | 116 (50)  | 140 (52) | 179 (49) | 172 (49) | 179 (54) | 177 (53) | 156 (53) | 152 (54) | 156 (55) |
| 34 | Community pharmacist                                   | 1033 (36) | -         | 98 (42)   | 98 (36)  | 142 (39) | 131 (37) | 120 (36) | 120 (36) | 118 (40) | 98 (35)  | 108 (38) |
| 35 | Nurse                                                  | 470 (16)  | 34 (23)   | 43 (19)   | 39 (14)  | 50 (14)  | 52 (15)  | 52 (16)  | 59 (18)  | 50 (17)  | 55 (20)  | 36 (13)  |
| 36 | Books/newspapers                                       | 202 (7)   | 11 (7)    | 28 (12)   | 24 (9)   | 25 (7)   | 23 (7)   | 20 (6)   | 16 (5)   | 21 (7)   | 17 (6)   | 17 (6)   |
| 37 | Relatives/friends                                      | 208 (7)   | 11 (7)    | 18 (8)    | 18 (7)   | 23 (6)   | 26 (7)   | 13 (4)   | 23 (7)   | 20 (7)   | 27 (10)  | 29 (10)  |
| 38 | Internet                                               | 417 (14)  | 1 (1)     | 9 (4)     | 28 (10)  | 56 (15)  | 57 (16)  | 48 (15)  | 67 (20)  | 64 (22)  | 40 (14)  | 47 (16)  |
| 39 | Advertisements                                         | 85 (3)    | 3 (2)     | 12 (5)    | 10 (4)   | 8 (2)    | 7 (2)    | 7 (2)    | 13 (4)   | 11 (4)   | 10 (4)   | 4 (1)    |
| 40 | Radio/television                                       | 96 (3)    | 7 (5)     | 11 (5)    | 7 (3)    | 9 (2)    | 9 (3)    | 10 (3)   | 16 (5)   | 9 (3)    | 11 (4)   | 7 (2)    |
| 41 | Health food stores                                     | 140 (5)   | 5 (3)     | 15 (7)    | 15 (6)   | 18 (5)   | 21 (6)   | 13 (4)   | 20 (6)   | 16 (5)   | 9 (3)    | 8 (3)    |
| 42 | Telephone services (call centres)                      | 3 (<1)    | -         | 1 (<1)    | 0 (0)    | 0 (0)    | 0 (0)    | 0 (0)    | 2 (1)    | 0 (0)    | 0 (0)    | 0 (0)    |
| 43 | No medicines information sources                       | 430 (15)  | 1 (1)     | 10 (4)    | 19 (7)   | 58 (16)  | 71 (20)  | 55 (17)  | 53 (16)  | 48 (16)  | 57 (20)  | 58 (20)  |
| 44 | <b>3 diseases or more</b>                              |           |           |           |          |          |          |          |          |          |          |          |
| 45 | Physician                                              | 2040      | 63 (5)    | 120 (6)   | 204 (10) | 253 (12) | 263 (13) | 237 (13) | 214 (12) | 230 (13) | 209 (13) | 247 (15) |
| 46 | Physician                                              | 1473 (72) | 58 (92)   | 103 (86)  | 172 (84) | 176 (70) | 179 (68) | 168 (71) | 156 (73) | 151 (66) | 142 (68) | 168 (68) |
| 47 | Community pharmacist                                   | 1232 (60) | 31 (49)   | 67 (56)   | 130 (64) | 142 (56) | 151 (57) | 149 (63) | 136 (64) | 136 (59) | 135 (65) | 155 (63) |
| 48 | Community pharmacist                                   | 853 (43)  | -         | 54 (45)   | 95 (47)  | 116 (46) | 106 (40) | 98 (41)  | 93 (43)  | 96 (42)  | 83 (40)  | 112 (45) |
| 49 | Nurse                                                  | 483 (24)  | 13 (21)   | 37 (31)   | 56 (28)  | 69 (27)  | 54 (21)  | 58 (24)  | 24 (11)  | 58 (25)  | 45 (22)  | 69 (28)  |
| 50 | Books/newspapers                                       | 185 (9)   | 12 (19)   | 19 (16)   | 30 (15)  | 25 (10)  | 20 (8)   | 20 (8)   | 22 (10)  | 12 (5)   | 7 (3)    | 18 (7)   |
| 51 | Relatives/friends                                      | 140 (7)   | 9 (14)    | 4 (3)     | 17 (8)   | 12 (5)   | 22 (8)   | 15 (6)   | 13 (6)   | 15 (7)   | 14 (7)   | 19 (8)   |
| 52 | Internet                                               | 334 (16)  | 2 (3)     | 2 (2)     | 15 (7)   | 32 (13)  | 47 (18)  | 47 (20)  | 48 (22)  | 46 (20)  | 39 (19)  | 56 (23)  |
| 53 | Advertisements                                         | 153 (8)   | 4 (6)     | 5 (4)     | 11 (5)   | 12 (5)   | 11 (4)   | 86 (3)   | 10 (5)   | 6 (3)    | 6 (3)    | 2 (1)    |
| 54 | Radio/television                                       | 104 (5)   | 5 (8)     | 9 (8)     | 18 (9)   | 14 (6)   | 12 (5)   | 10 (4)   | 14 (7)   | 4 (2)    | 7 (3)    | 11 (4)   |
| 55 | Health food stores                                     | 107 (5)   | 7 (11)    | 6 (5)     | 19 (9)   | 15 (6)   | 8 (3)    | 13 (5)   | 11 (5)   | 8 (3)    | 10 (5)   | 10 (4)   |
| 56 | Telephone services (call centres)                      | 7 (<1)    | -         | 0 (0)     | 1 (1)    | 2 (1)    | 3 (1)    | 0 (0)    | 0 (0)    | 0 (0)    | 0 (0)    | 1 (<1)   |
| 57 | No medicines information sources                       | 219 (11)  | 0 (0)     | 5 (4)     | 5 (2)    | 23 (9)   | 34 (13)  | 28 (12)  | 26 (12)  | 39 (17)  | 26 (12)  | 33 (13)  |

<sup>a</sup>Discrepancies in totals are due to rounding errors, <sup>b</sup>Calculated from study years available, <sup>c</sup>Respondents who had disease (list in the survey) diagnosed by a physician during the last year (12 months).

STROBE Statement—Checklist of items that should be included in reports of *cross-sectional studies*

|                              | Item No | Recommendation                                                                                                                                                                                    | Page No |
|------------------------------|---------|---------------------------------------------------------------------------------------------------------------------------------------------------------------------------------------------------|---------|
| <b>Title and abstract</b>    | 1       | (a) Indicate the study's design with a commonly used term in the title or the abstract                                                                                                            | 1       |
|                              |         | (b) Provide in the abstract an informative and balanced summary of what was done and what was found                                                                                               | 2       |
| <b>Introduction</b>          |         |                                                                                                                                                                                                   |         |
| Background/rationale         | 2       | Explain the scientific background and rationale for the investigation being reported                                                                                                              | 4       |
| Objectives                   | 3       | State specific objectives, including any prespecified hypotheses                                                                                                                                  | 4       |
| <b>Methods</b>               |         |                                                                                                                                                                                                   |         |
| Study design                 | 4       | Present key elements of study design early in the paper                                                                                                                                           | 5,6     |
| Setting                      | 5       | Describe the setting, locations, and relevant dates, including periods of recruitment, exposure, follow-up, and data collection                                                                   | 5-7     |
| Participants                 | 6       | (a) Give the eligibility criteria, and the sources and methods of selection of participants                                                                                                       | 5,6     |
| Variables                    | 7       | Clearly define all outcomes, exposures, predictors, potential confounders, and effect modifiers. Give diagnostic criteria, if applicable                                                          | 6,7     |
| Data sources/<br>measurement | 8*      | For each variable of interest, give sources of data and details of methods of assessment (measurement). Describe comparability of assessment methods if there is more than one group              | 6       |
| Bias                         | 9       | Describe any efforts to address potential sources of bias                                                                                                                                         | 14      |
| Study size                   | 10      | Explain how the study size was arrived at                                                                                                                                                         | 8       |
| Quantitative variables       | 11      | Explain how quantitative variables were handled in the analyses. If applicable, describe which groupings were chosen and why                                                                      | 6,7     |
| Statistical methods          | 12      | (a) Describe all statistical methods, including those used to control for confounding                                                                                                             | 6,7     |
|                              |         | (b) Describe any methods used to examine subgroups and interactions                                                                                                                               | 6,7     |
|                              |         | (c) Explain how missing data were addressed                                                                                                                                                       | 6       |
|                              |         | (d) If applicable, describe analytical methods taking account of sampling strategy                                                                                                                | NA      |
|                              |         | (e) Describe any sensitivity analyses                                                                                                                                                             | NA      |
| <b>Results</b>               |         |                                                                                                                                                                                                   |         |
| Participants                 | 13*     | (a) Report numbers of individuals at each stage of study—eg numbers potentially eligible, examined for eligibility, confirmed eligible, included in the study, completing follow-up, and analysed | 8       |
|                              |         | (b) Give reasons for non-participation at each stage                                                                                                                                              | 6,8     |
|                              |         | (c) Consider use of a flow diagram                                                                                                                                                                | NA      |
| Descriptive data             | 14*     | (a) Give characteristics of study participants (eg demographic, clinical, social) and information on exposures and potential confounders                                                          | 8-10    |
|                              |         | (b) Indicate number of participants with missing data for each variable of interest                                                                                                               | 9-10    |
| Outcome data                 | 15*     | Report numbers of outcome events or summary measures                                                                                                                                              | 11,12   |
| Main results                 | 16      | (a) Give unadjusted estimates and, if applicable, confounder-adjusted                                                                                                                             | NA      |

|                          |    |                                                                                                                                                                            |                  |
|--------------------------|----|----------------------------------------------------------------------------------------------------------------------------------------------------------------------------|------------------|
|                          |    | estimates and their precision (eg, 95% confidence interval). Make clear which confounders were adjusted for and why they were included                                     |                  |
|                          |    | (b) Report category boundaries when continuous variables were categorized                                                                                                  | NA               |
|                          |    | (c) If relevant, consider translating estimates of relative risk into absolute risk for a meaningful time period                                                           | NA               |
| Other analyses           | 17 | Report other analyses done—eg analyses of subgroups and interactions, and sensitivity analyses                                                                             | 12, Appendix 1&2 |
| <b>Discussion</b>        |    |                                                                                                                                                                            |                  |
| Key results              | 18 | Summarise key results with reference to study objectives                                                                                                                   | 14,15            |
| Limitations              | 19 | Discuss limitations of the study, taking into account sources of potential bias or imprecision. Discuss both direction and magnitude of any potential bias                 | 15,16            |
| Interpretation           | 20 | Give a cautious overall interpretation of results considering objectives, limitations, multiplicity of analyses, results from similar studies, and other relevant evidence | 14-16            |
| Generalisability         | 21 | Discuss the generalisability (external validity) of the study results                                                                                                      | 15               |
| <b>Other information</b> |    |                                                                                                                                                                            |                  |
| Funding                  | 22 | Give the source of funding and the role of the funders for the present study and, if applicable, for the original study on which the present article is based              | 17               |

\*Give information separately for exposed and unexposed groups.

**Note:** An Explanation and Elaboration article discusses each checklist item and gives methodological background and published examples of transparent reporting. The STROBE checklist is best used in conjunction with this article (freely available on the Web sites of PLoS Medicine at <http://www.plosmedicine.org/>, Annals of Internal Medicine at <http://www.annals.org/>, and Epidemiology at <http://www.epidem.com/>). Information on the STROBE Initiative is available at [www.strobe-statement.org](http://www.strobe-statement.org).



# BMJ Open

## Trends in the receipt of medicines information among Finnish adults in 1999–2014: a nationwide repeated cross-sectional survey

|                                 |                                                                                                                                                                                                                                                                                                                                                                                                                                                                                      |
|---------------------------------|--------------------------------------------------------------------------------------------------------------------------------------------------------------------------------------------------------------------------------------------------------------------------------------------------------------------------------------------------------------------------------------------------------------------------------------------------------------------------------------|
| Journal:                        | <i>BMJ Open</i>                                                                                                                                                                                                                                                                                                                                                                                                                                                                      |
| Manuscript ID                   | bmjopen-2018-026377.R2                                                                                                                                                                                                                                                                                                                                                                                                                                                               |
| Article Type:                   | Research                                                                                                                                                                                                                                                                                                                                                                                                                                                                             |
| Date Submitted by the Author:   | 11-Mar-2019                                                                                                                                                                                                                                                                                                                                                                                                                                                                          |
| Complete List of Authors:       | Mononen, Niina; University of Helsinki, Faculty of Pharmacy, Division of Pharmacology and Pharmacotherapy<br>Airaksinen, Marja; University of Helsinki, Division of Pharmacology and Pharmacotherapy<br>Hämeen-Anttila, Katri; Finnish Medicines Agency FIMEA, Assessment of Pharmacotherapies<br>Helakorpi, Satu; Terveystieteiden ja hyvinvoinnin laitos<br>Pohjanoksa-Mäntylä, Marika ; University of Helsinki, Faculty of Pharmacy, Division of Pharmacology and Pharmacotherapy |
| <b>Primary Subject Heading</b>: | Health informatics                                                                                                                                                                                                                                                                                                                                                                                                                                                                   |
| Secondary Subject Heading:      | Health policy                                                                                                                                                                                                                                                                                                                                                                                                                                                                        |
| Keywords:                       | Medicines information, Medicines information sources, Population study, Repeated cross-sectional survey, Finland                                                                                                                                                                                                                                                                                                                                                                     |
|                                 |                                                                                                                                                                                                                                                                                                                                                                                                                                                                                      |

SCHOLARONE™  
Manuscripts

|                                             |                                                                                                                                                                                                                                                                                                                                                                                                                                                                                                                                                                                                                                  |
|---------------------------------------------|----------------------------------------------------------------------------------------------------------------------------------------------------------------------------------------------------------------------------------------------------------------------------------------------------------------------------------------------------------------------------------------------------------------------------------------------------------------------------------------------------------------------------------------------------------------------------------------------------------------------------------|
| <b>Title</b>                                | <b>Trends in the receipt of medicines information among Finnish adults in 1999–2014: a nationwide repeated cross-sectional survey</b>                                                                                                                                                                                                                                                                                                                                                                                                                                                                                            |
| <b>Authors' names</b>                       | Niina Mononen, Marja Airaksinen, Katri Hämeen-Anttila, Satu Helakorpi, Marika Pohjanoksa-Mäntylä                                                                                                                                                                                                                                                                                                                                                                                                                                                                                                                                 |
| <b>Address and position for each author</b> | <p>Niina Mononen, MSc (Pharm), PhD Student<br/> Marja Airaksinen, Professor, PhD<br/> Marika Pohjanoksa-Mäntylä, PhD, University Lecturer</p> <p>Clinical Pharmacy Group, Division of Pharmacology and Pharmacotherapy, Faculty of Pharmacy, University of Helsinki, 00014 University of Helsinki, Finland</p> <p>Katri Hämeen-Anttila, PhD, Research and Development Manager</p> <p>Assessment of Pharmacotherapies, Finnish Medicines Agency Fimea, P.O. Box 55, 00034 FIMEA, Finland</p> <p>Satu Helakorpi, PhD, Senior Researcher</p> <p>National Institute for Health and Welfare, P.O. Box 30, 00271 Helsinki, Finland</p> |
| <b>Corresponding author</b>                 | Niina Mononen<br>Clinical Pharmacy Group, Division of Pharmacology and Pharmacotherapy, Faculty of Pharmacy, University of Helsinki, 00014 University of Helsinki, Finland<br>E-mail: <a href="mailto:niina.mononen@helsinki.fi">niina.mononen@helsinki.fi</a><br>Telephone: +358 2941 59917                                                                                                                                                                                                                                                                                                                                     |

**Word count:** 3993

**Keywords:** Medicines information, Medicines information sources, Population study, Repeated cross-sectional survey, Finland

## ABSTRACT

### Objective

The aim of this study was to examine long-term trends in the receipt of medicines information (MI) among adult medicine users from 1999 to 2014.

### Design

Repeated cross-sectional postal survey from the years 1999, 2002, 2005 and 2008-2014.

### Setting

Each study year, a new nationally representative sample of 5000 Finns aged 15-64 years was drawn from the Population Register Centre of Finland.

### Participants

The range of annual respondents varied from 2545 to 3371 and response rates from 53% to 67%. Of the total responses (n=29465) 64% were from medicine users (n=18862, ranging by year from 58% to 68%).

### Outcome measures

Receipt of information on medicines in use within 12 months prior to the survey from a given list of consumer MI sources available in Finland.

### Results

Physicians, community pharmacists and package leaflets were the most common MI sources throughout the study period. Receipt of MI increased most from the Internet (from 1% in 1999 to 16% in 2014), while decreased most from physicians (62% to 47%) and package leaflets (44% to 34%), and remained stable from community pharmacists (46% to 45%) and nurses (14% to 14%). In 1999, of the medicine users 4% did not report receipt of MI from any of the sources listed in the survey, while this proportion had remarkably increased to 28% in 2014.

### Conclusions

Healthcare professionals and package leaflets had still a dominating importance in 2014 despite the growing number of MI sources over time, but still a minority of adult medicine users reported receiving MI via the Internet in 2014. Worrying is that the proportion of adult medicine users who did not receive MI from any of the sources became 7-fold during the study period.

### Strengths and limitations of this study

- The key strength of this national population study is that it examines trends in the receipt of medicines information among adult medicine users within a 15-year time period by using representative random population samples with high enough response rates for generalizable results.
- Repeated surveys are necessary to indicate population level changes in the utilization of available MI sources and reveal needs to develop MI practices and policies at the national level.
- Due to the cross-sectional method without cohorts, it is not possible to follow up changes in the receipt of medicines information over time at the individual level.
- The data did not provide any information about the quality, validity or amount of the medicines information received.
- Factors contributing to a growing number of adult medicine users not receiving medicines information from any sources should be better understood and focused on in future research.

review only

## INTRODUCTION

Consumer access to medicines information (MI) has dramatically improved during the last decades.<sup>1-7</sup> Driving forces for more open access to MI have been drug safety issues, patients' right to know about medicinal interventions that they are exposed to and tendency to empower people in taking more responsibility for self-management of their diseases.<sup>2,4,7</sup> These changes have led to improved availability of MI, first on paper and later via the Internet and electronic applications in smartphones and other electronic devices. The applications are evolving fast towards systems enabling customized MI, interactive communications and following up treatments.<sup>1,3,4,8-10</sup> Improved communication on medications have also been a strategic priority in national and international medicines policies, e.g. within the European Union.<sup>2,4,11-16</sup>

Consumers' health information seeking, including MI seeking from various information sources, have been widely researched.<sup>17-20</sup> Previous research on the receipt of MI among the adult population have either focused on 1) particular patient groups such as asthmatics,<sup>21</sup> people with cancer,<sup>22</sup> cardiovascular diseases,<sup>23</sup> HIV/AIDS,<sup>24</sup> mental disorders<sup>25</sup> or vasculitis,<sup>26</sup> and pregnant women,<sup>27,28</sup> or 2) focused on certain medicine user groups such as users of hormone replacement therapies,<sup>29-31</sup> analgesics,<sup>32,33</sup> antidepressants,<sup>34</sup> antihypertensives,<sup>35</sup> cardiovascular medicines<sup>36</sup> or psychotropics.<sup>37</sup> Previous studies have mostly applied single cross-sectional study designs.<sup>38-46</sup> We found only one study that compared results from two years, covering a 7-year period.<sup>47</sup> The consistent findings from the previous studies are that physicians, pharmacists and package leaflets are the most common sources of MI regardless of the research method, the study year, the country and the research population.<sup>21-47</sup> Consumers usually sought MI from only one or two information sources.<sup>28,34,39,43,44</sup> The use of the Internet as a source of MI has become more common over time, but it is not yet as commonly used source of MI for consumers as healthcare professionals.<sup>22,24-26,30,31,33-35,38-40,42,44-46</sup> However, there is a lack of long-term population-based studies describing trends in the receipt of MI among adult medicine users. Repeated surveys are necessary to indicate population level changes in the utilization of available MI sources and to reveal needs to develop MI practices and policies at the national level. In Finland, improving the accessibility and quality of MI have been among the key strategic medicines policy goals over the last decades.<sup>2,15</sup> The long-term comparative information in the receipt of MI and the proportion of people receiving MI are important measures to indicate whether the desired outcomes are met. Therefore, this study examined long-term trends in the receipt of MI among Finnish adult medicine users in 1999-2014.

## METHODS

### Context

Similarly to many developed countries, availability of consumer MI has dramatically improved in Finland during the last decades.<sup>2,4,7</sup> Until 1983, patients and medicine users received information about their medicines exclusively from their physicians.<sup>7,48</sup> The remarkable landmarks towards more open access to MI have been pharmacists' duty to counsel on prescription and non-prescription medicines in 1983, followed in 1986 by the launch of the first computerized database providing leaflets for consumers in community pharmacies. Package leaflets became mandatory across the European Union in 1999.<sup>49</sup> About the same time, the Internet and mobile phones became more common and eventually revolutionized access to health and MI. "From paper the cyber" shift has improved access to statutory MI, e.g. by making package leaflets available online in written and audio format.<sup>50,51</sup> A wide range of stakeholders from the drug industry to non-profit professional and patient organisations have been developing new databases and modes for communicating on medicines to consumers. To coordinate MI practices and enhance public-private partnerships, the European Union has recommended its member states to establish national MI programs and strategies.<sup>13</sup> Such a strategy was established for the first time in Finland in 2012 by the Finnish Medicines Agency.<sup>2</sup> The ultimate goal of the strategy is to improve adherence to long-term therapies by enhanced MI by 2020.

### Study design

The study was conducted as a repeated cross-sectional postal survey using each year a new nationally representative sample (n=5000) of the Finnish adult population aged 15-64 years.<sup>52</sup> The national health behavior survey used in this study has its origins in the North Karelia Project, started in 1972, which has been instrumental in improving public health in Finland.<sup>53</sup> The annual "Health Behaviour and Health among the Finnish Adult Population" survey was established in 1978 to perform as an indicator for changes in the population health and related risk factors, such as smoking, food and alcohol consumption and physical activity.<sup>52</sup> The survey has been targeted to the adult working age population of 15-64 years old. The survey has been repeated every year in the same way to yield comparable results. In addition to the original standard set of structured questions, some other questions have been added to the survey instrument over the years. One of the added questions was the one used in our study concerning receipt of MI from different sources available for consumers/medicine users in Finland (added to the survey instrument in 1999).

1  
2  
3 The sample has been derived from the Population Register Centre of Finland which is a government-  
4 based register where all Finnish citizens and permanent residents are obliged to be registered.<sup>52,54</sup> The  
5 survey has been conducted every year (1978-2014) as a postal survey.<sup>52</sup> The distribution of the  
6 questionnaires by mail has assured better coverage of the entire study population than e.g., using online  
7 surveys. This is because the Population Register Centre has the current address available for all Finns  
8 and permanent residents. In order to maintain response rate high enough for generalizable results, three  
9 reminders were sent during the study period covered in our study (1999-2014).<sup>55</sup> Data from the years  
10 1999, 2002, 2005, 2008-2014 was compared as these are the years when the survey instrument included  
11 the question on the receipt of MI.  
12  
13  
14  
15  
16  
17  
18

### 19 **Survey instrument and measures**

20  
21  
22 The main outcome measure was the receipt of MI on medicines in use. The survey instrument contained  
23 the question “In the past year (12 months), from which sources did you receive information on the  
24 medicines you have been using?” The question was followed by a list of MI sources available for  
25 consumers in Finland at the time of the study (Fig. 1). Respondents could indicate from the list as many  
26 information sources as applicable. It was not possible to report other sources than those mentioned in  
27 the survey. In 2002, package leaflets and telephone services were added to the list of MI sources.  
28  
29  
30  
31  
32

33 Socio-demographic variables used in this study were gender, age and education. Health-related  
34 variables were respondents’ medicine use and diagnosed diseases. Use of medicines was assessed by  
35 the question “Have you used any tablets, powders, or other medicines within the past week (7 days)?”  
36 This question was followed by a list of commonly used prescription and non-prescription medicines for  
37 common chronic and acute conditions (Table 1). Respondents could indicate from the list as many  
38 medicines as they had been using within 7 days prior to the survey. It was not possible to report any  
39 other medicines other than those mentioned in the list. The use of medication within the past 7 days was  
40 used as a measure in order to control recall bias.<sup>56</sup> Diagnosed diseases were asked by a question “Within  
41 the past year (12 months), have you had any of the following diagnosed diseases or diseases treated by  
42 the physicians?” This question was followed by a list of chronic and acute diseases common in Finland  
43 (Table 1). Respondents could indicate from the list as many diseases as they had been suffering from  
44 within the year prior to the survey. It was not possible to report any other diseases than those mentioned  
45 in the list.  
46  
47  
48  
49  
50  
51  
52  
53  
54  
55  
56  
57  
58  
59  
60

## Analysis

Statistical analyses were conducted with the Statistical Package for Social Sciences software (IBM SPSS Statistics for Windows, Released 2016, Version 24.0. Armonk, NY: IBM Corp.). Only respondents who reported using at least one prescription or non-prescription medicine during the 7 days' time frame prior to the survey were included in the analysis as medicine users.

Age calculation was based on the year of birth, and the respondents' age were divided into five age groups. Education was measured as the total number of self-reported school years and were divided into two educational level. The number of medicines in use was counted for each respondent, and respondents were divided into following groups: people using one, two, three, and four or more medicines. Also, the number of diagnosed diseases was counted for each respondent, and respondents were divided into following groups: no diseases, one, two, three or more diseases. The receipt of MI was presented by all these medicine user groups and diagnosed diseases. The number of MI sources from which the respondents had received information on the medicines they used was divided into following groups: no sources, one, two, three, four, five and six or more sources.

Trends in the receipt of MI from different information sources and the number of MI sources used by the respondent were counted for each study year 1999, 2002, 2005, 2008-2014. The significance of the change in the receipt of MI between the study years was analysed with logistic regression. Analyses were adjusted for potential confounding factors (i.e. age, gender, educational, number of medicines in use and number of diagnosed diseases). The receipt of MI from different sources was calculated by gender, age, number of medicines in use and number of diagnosed diseases for each study year.

Finally, a ratio between the mean number of medicines in use and the mean number of diagnosed diseases compared to the mean number of MI sources from which MI was received was calculated to indicate whether any remarkable changes were seen over time in the number of MI sources used in relation to morbidity and medicine use.



## Patient and public involvement

Patient perspective was taken into account in designing the research question on MI by reviewing previous international and national research on the topic.<sup>6,57-59</sup> The question as it appears in the survey instrument is a result of extensive work by senior researchers in public health and medicines information. The question was piloted in several formats with the target group (5-10 individuals from the target group recruited as a convenience sample) and the current version was found to be most valid for the primary purpose of the survey that was to indicate long-term trends. The results of the study have not been sent to the study participants for comments, but the annual reports of the “Health Behaviour and Health among the Finnish Adult Population” surveys are available online.<sup>52</sup>

## Research ethics

As this study was a secondary analysis using routinely collected and fully anonymized data, ethics approval was not applicable.<sup>60</sup> Responding to the survey was voluntary and considered as giving an informed consent. All study procedures were conducted according to good scientific practice.

## RESULTS

The number of respondents varied by year from 2545 to 3371, and the response rate decreased from 67% in 1999 to 53% in 2014 (Table 1). Of the total responses (n=29465) 64% were from medicine users (n=18862, ranging by year from 58% to 68%). The gender distribution of the respondents who reported using medicines remained the same throughout the study period, 61-64% being female (Table 1). The annual mean age varied between 41 and 45 years. The respondents used most commonly one medicine, ranging from 63% in 1999 to 54% in 2014 (included prescription and non-prescription medicines). The respondents reported using medicines most commonly for headaches (range 50% to 53%), other aches or pains (28% to 31%) and high blood pressure (15% to 23%). More than a third of the medicine users reported having at least one diagnosed disease of the diseases listed in the survey, increasing from 37% in 1999 to 59% in 2014). The most common diseases reported were high blood pressure or hypertension (range 18% to 25%), high blood cholesterol (13% to 21%), hay or allergic rhinitis (15% to 18%), and degenerative disk disease or other back illness (13% to 15%).

Table 1. Characteristics of the respondents (n=29465) according to study year. The percentages are calculated from the total number of the respondents each year or of the respondents reporting use of at least one prescription or non-prescription medicine within 7 days prior to survey (n=18862)<sup>a</sup>.

| Characteristics                                    | Total <sup>b</sup><br>n (%) | Study years   |               |               |               |               |               |               |               |               |               |
|----------------------------------------------------|-----------------------------|---------------|---------------|---------------|---------------|---------------|---------------|---------------|---------------|---------------|---------------|
|                                                    |                             | 1999<br>n (%) | 2002<br>n (%) | 2005<br>n (%) | 2008<br>n (%) | 2009<br>n (%) | 2010<br>n (%) | 2011<br>n (%) | 2012<br>n (%) | 2013<br>n (%) | 2014<br>n (%) |
| Number of respondents (response rate)              | 29465 (59)                  | 3371 (67)     | 3259 (65)     | 3287 (66)     | 3216 (64)     | 2943 (59)     | 2826 (57)     | 2787 (56)     | 2601 (52)     | 2545 (51)     | 2630 (53)     |
| Respondents using medicines <sup>c</sup>           | 18862 (64)                  | 1944 (58)     | 2000 (61)     | 2038 (62)     | 2101 (65)     | 1957 (66)     | 1871 (66)     | 1844 (66)     | 1759 (68)     | 1677 (66)     | 1671 (64)     |
| Gender <sup>d</sup>                                |                             |               |               |               |               |               |               |               |               |               |               |
| Female                                             | 11859 (63)                  | 1217 (63)     | 1278 (64)     | 1258 (62)     | 1332 (63)     | 1235 (63)     | 1181 (63)     | 1128 (61)     | 1101 (63)     | 1061 (63)     | 1068 (64)     |
| Male                                               | 7003 (37)                   | 727 (37)      | 722 (36)      | 780 (38)      | 769 (37)      | 722 (37)      | 690 (37)      | 716 (39)      | 658 (37)      | 616 (37)      | 603 (36)      |
| Age (years) <sup>d</sup>                           |                             |               |               |               |               |               |               |               |               |               |               |
| 15-24                                              | 2535 (13)                   | 314 (16)      | 308 (15)      | 269 (13)      | 270 (13)      | 263 (13)      | 255 (14)      | 231 (13)      | 211 (12)      | 199 (12)      | 215 (13)      |
| 25-34                                              | 2798 (15)                   | 331 (17)      | 308 (15)      | 302 (15)      | 305 (15)      | 287 (15)      | 258 (14)      | 277 (15)      | 251 (14)      | 240 (14)      | 239 (14)      |
| 35-44                                              | 3409 (18)                   | 419 (22)      | 411 (21)      | 394 (19)      | 376 (18)      | 335 (17)      | 304 (16)      | 318 (17)      | 292 (17)      | 275 (16)      | 285 (17)      |
| 45-54                                              | 4558 (24)                   | 481 (25)      | 486 (24)      | 491 (24)      | 490 (23)      | 460 (24)      | 484 (26)      | 438 (24)      | 430 (24)      | 411 (25)      | 387 (23)      |
| 55-64                                              | 5562 (29)                   | 399 (21)      | 487 (24)      | 582 (29)      | 660 (31)      | 612 (31)      | 570 (31)      | 580 (32)      | 575 (32)      | 552 (33)      | 545 (33)      |
| Mean age (Standard deviation)                      | 43.8 (14.2)                 | 41.2 (13.9)   | 42.1 (14.0)   | 43.6 (14.0)   | 44.3 (14.1)   | 44.2 (14.3)   | 44.3 (14.3)   | 44.4 (14.1)   | 44.9 (14.1)   | 45.0 (14.1)   | 44.6 (14.3)   |
| Education <sup>d</sup>                             |                             |               |               |               |               |               |               |               |               |               |               |
| Primary school or lower ( $\leq 9$ years)          | 3048 (16)                   | 499 (26)      | 444 (23)      | 402 (20)      | 351 (17)      | 306 (16)      | 253 (14)      | 226 (12)      | 222 (13)      | 170 (10)      | 175 (11)      |
| Higher than primary school ( $>9$ years)           | 15495 (84)                  | 1420 (74)     | 1499 (77)     | 1608 (80)     | 1705 (83)     | 1621 (84)     | 1590 (86)     | 1591 (88)     | 1517 (87)     | 1482 (90)     | 1462 (89)     |
| Respondents using medicines for <sup>d</sup>       |                             |               |               |               |               |               |               |               |               |               |               |
| Headache                                           | 9806 (52)                   | 1039 (53)     | 1032 (52)     | 1026 (50)     | 1073 (51)     | 1024 (52)     | 980 (52)      | 981 (53)      | 901 (51)      | 866 (52)      | 884 (53)      |
| Ache, pain (other than headache)                   | 5467 (29)                   | 556 (29)      | 549 (28)      | 592 (29)      | 604 (29)      | 541 (28)      | 531 (29)      | 550 (30)      | 544 (31)      | 508 (30)      | 492 (29)      |
| High blood pressure                                | 4077 (22)                   | 291 (15)      | 367 (18)      | 429 (21)      | 465 (22)      | 450 (23)      | 434 (23)      | 446 (24)      | 409 (23)      | 395 (24)      | 391 (23)      |
| Contraception (oral)                               | 2310 (12)                   | 264 (14)      | 296 (15)      | 247 (12)      | 258 (12)      | 238 (12)      | 223 (12)      | 193 (11)      | 188 (11)      | 199 (12)      | 204 (12)      |
| High blood cholesterol                             | 2196 (12)                   | 98 (5)        | 143 (7)       | 217 (11)      | 263 (13)      | 296 (15)      | 290 (16)      | 235 (13)      | 217 (12)      | 211 (13)      | 226 (14)      |
| Women's hormone replacement therapy                | 2036 (11)                   | 233 (12)      | 266 (13)      | 233 (11)      | 222 (11)      | 188 (10)      | 188 (10)      | 166 (9)       | 198 (11)      | 174 (10)      | 168 (10)      |
| Cough                                              | 1316 (7)                    | 220 (11)      | 186 (9)       | 168 (8)       | 160 (8)       | 113 (6)       | 77 (4)        | 111 (6)       | 101 (6)       | 103 (6)       | 77 (5)        |
| Insomnia                                           | 1497 (8)                    | 136 (7)       | 153 (8)       | 153 (8)       | 179 (9)       | 177 (9)       | 140 (8)       | 139 (8)       | 134 (8)       | 146 (9)       | 140 (8)       |
| Sedation                                           | 915 (5)                     | 133 (7)       | 93 (5)        | 121 (6)       | 102 (5)       | 94 (5)        | 70 (4)        | 85 (5)        | 76 (4)        | 69 (4)        | 72 (4)        |
| Men's sexual potency dysfunction                   | 252 (1)                     | 13 (1)        | 20 (1)        | 28 (1)        | 26 (1)        | 21 (1)        | 26 (1)        | 37 (2)        | 34 (2)        | 19 (1)        | 28 (2)        |
| Depression <sup>e</sup>                            | 1314 (7)                    | -             | 111 (6)       | 143 (7)       | 148 (7)       | 176 (9)       | 136 (5)       | 147 (8)       | 173 (10)      | 134 (8)       | 146 (9)       |
| Diabetes (other than insulin) <sup>f</sup>         | 705 (4)                     | -             | -             | 72 (4)        | 82 (4)        | 88 (4)        | 88 (5)        | 80 (4)        | 98 (6)        | 91 (5)        | 106 (6)       |
| Diabetes (insulin) <sup>f</sup>                    | 361 (2)                     | -             | -             | 46 (2)        | 49 (2)        | 46 (2)        | 47 (3)        | 51 (3)        | 36 (2)        | 50 (3)        | 36 (2)        |
| Number of medicines in use/person <sup>d</sup>     |                             |               |               |               |               |               |               |               |               |               |               |
| 1                                                  | 10558 (56)                  | 1215 (63)     | 1183 (59)     | 1143 (56)     | 1154 (55)     | 1060 (54)     | 1029 (55)     | 1011 (55)     | 946 (54)      | 907 (54)      | 910 (54)      |
| 2                                                  | 5116 (27)                   | 505 (26)      | 559 (28)      | 566 (28)      | 584 (28)      | 536 (27)      | 512 (27)      | 491 (27)      | 492 (28)      | 442 (26)      | 429 (26)      |
| 3                                                  | 1984 (11)                   | 161 (8)       | 166 (8)       | 198 (10)      | 221 (11)      | 220 (11)      | 210 (11)      | 210 (11)      | 191 (11)      | 208 (12)      | 199 (12)      |
| >3                                                 | 1204 (6)                    | 63 (3)        | 92 (5)        | 131 (6)       | 142 (7)       | 141 (7)       | 120 (6)       | 132 (7)       | 130 (7)       | 120 (7)       | 133 (8)       |
| Respondents with diagnosed diseases <sup>d,g</sup> |                             |               |               |               |               |               |               |               |               |               |               |

1  
2  
3  
4  
5  
6  
7  
8  
9  
10  
11  
12  
13  
14  
15  
16  
17  
18  
19  
20  
21  
22  
23  
24  
25  
26  
27  
28  
29  
30  
31  
32  
33  
34  
35  
36  
37  
38  
39  
40  
41  
42  
43  
44  
45  
46

|                                                                  |           |           |           |          |          |          |          |          |          |          |          |
|------------------------------------------------------------------|-----------|-----------|-----------|----------|----------|----------|----------|----------|----------|----------|----------|
| High blood pressure, hypertension                                | 4297 (23) | 345 (18)  | 426 (21)  | 465 (23) | 496 (24) | 478 (24) | 443 (24) | 468 (25) | 421 (24) | 379 (22) | 376 (23) |
| Degenerative disc disease, other back illness                    | 2712 (14) | 262 (14)  | 284 (14)  | 314 (15) | 321 (15) | 263 (13) | 260 (14) | 272 (15) | 260 (15) | 227 (14) | 249 (15) |
| Asthma                                                           | 1163 (6)  | 113 (6)   | 114 (6)   | 112 (6)  | 120 (6)  | 132 (7)  | 125 (7)  | 113 (6)  | 120 (7)  | 99 (6)   | 115 (7)  |
| Digestive illness (gastritis catarrh, gastritis, ulcer)          | 904 (5)   | 96 (5)    | 97 (5)    | 108 (5)  | 110 (5)  | 93 (5)   | 91 (5)   | 70 (4)   | 85 (5)   | 89 (5)   | 65 (4)   |
| Coronary disease, angina pectoris (= chest pain during exercise) | 414 (2)   | 66 (3)    | 48 (2)    | 52 (3)   | 47 (2)   | 35 (2)   | 41 (2)   | 34 (2)   | 31 (2)   | 26 (2)   | 30 (2)   |
| Diabetes                                                         | 1092 (6)  | 50 (2)    | 78 (4)    | 113 (6)  | 121 (6)  | 129 (7)  | 121 (7)  | 110 (6)  | 124 (7)  | 108 (6)  | 138 (8)  |
| Rheumatoid arthritis                                             | 396 (2)   | 46 (2)    | 36 (2)    | 37 (2)   | 46 (2)   | 37 (2)   | 40 (2)   | 41 (2)   | 44 (3)   | 37 (2)   | 32 (2)   |
| Chronic bronchitis, pulmonary emphysema                          | 322 (2)   | 34 (2)    | 30 (2)    | 35 (2)   | 38 (2)   | 52 (3)   | 28 (2)   | 36 (2)   | 20 (1)   | 22 (1)   | 27 (2)   |
| Coronary thrombosis, myocardial infarction                       | 118 (1)   | 9 (1)     | 13 (1)    | 13 (1)   | 13 (1)   | 8 (<1)   | 11 (1)   | 17 (1)   | 10 (1)   | 9 (1)    | 15 (1)   |
| High blood cholesterol <sup>c</sup>                              | 2913 (17) | -         | 267 (13)  | 338 (17) | 356 (17) | 409 (21) | 368 (20) | 319 (17) | 282 (16) | 287 (16) | 287 (17) |
| Depression <sup>f</sup>                                          | 1242 (8)  | -         | -         | 173 (9)  | 175 (8)  | 178 (9)  | 134 (7)  | 150 (8)  | 161 (9)  | 124 (7)  | 147 (9)  |
| Other mental health disorder <sup>f</sup>                        | 534 (4)   | -         | -         | 64 (3)   | 73 (4)   | 66 (3)   | 47 (3)   | 82 (4)   | 65 (4)   | 73 (4)   | 64 (4)   |
| Cancer <sup>f</sup>                                              | 206 (1)   | -         | -         | 29 (1)   | 26 (1)   | 26 (1)   | 28 (2)   | 23 (1)   | 34 (2)   | 23 (1)   | 17 (1)   |
| Hay or allergic rhinitis <sup>h</sup>                            | 2044 (16) | -         | -         | -        | 340 (16) | 292 (15) | 275 (15) | 272 (15) | 283 (16) | 275 (16) | 307 (18) |
| Food allergy <sup>h</sup>                                        | 580 (5)   | -         | -         | -        | 85 (4)   | 84 (4)   | 92 (4)   | 78 (4)   | 85 (5)   | 72 (4)   | 84 (5)   |
| Number of diagnosed diseases/person <sup>d,g</sup>               |           |           |           |          |          |          |          |          |          |          |          |
| 0                                                                | 8590 (46) | 1228 (63) | 1121 (56) | 971 (48) | 850 (40) | 772 (39) | 796 (43) | 746 (40) | 705 (42) | 721 (42) | 689 (41) |
| 1                                                                | 5176 (27) | 502 (26)  | 527 (26)  | 593 (29) | 605 (29) | 546 (28) | 482 (26) | 517 (28) | 499 (28) | 455 (27) | 450 (27) |
| 2                                                                | 2924 (16) | 151 (8)   | 232 (12)  | 270 (13) | 367 (17) | 358 (22) | 335 (18) | 345 (19) | 302 (17) | 279 (17) | 285 (17) |
| >2                                                               | 2172 (12) | 63 (3)    | 120 (6)   | 204 (10) | 279 (13) | 281 (14) | 258 (14) | 236 (13) | 253 (14) | 231 (14) | 247 (15) |

<sup>a</sup>Discrepancies in totals are due to rounding errors, <sup>b</sup>Calculated from study years available, <sup>c</sup>Percentages have been calculated from the respondents of each year, <sup>d</sup>Percentages have been calculated from the respondents of each year who reported using medicines, including prescription and non-prescription medicines (list in the survey) during the last week (7 days), <sup>e</sup>Added to the survey instrument in 2002, <sup>f</sup>Added to the survey instrument in 2005, <sup>g</sup>Respondents who had a disease (list in the survey) diagnosed by a physician during the last year (12 months), <sup>h</sup>Added to the survey instrument in 2008.

### Medicines information sources among adult medicine users

The most commonly reported MI sources were physicians, community pharmacists and package leaflets throughout the study period among adult medicine users (Fig. 1, Table 2). These information sources were most common despite gender, age, number of medicines in use or diagnosed diseases (Appendix A,B). Receipt of MI from physicians (62% to 47%) and package leaflets (44% to 34%) decreased most during the study period, while remained stable from community pharmacists (46% to 45%) and nurses (14% to 14%) (Fig. 1). In 1999, of the medicine users 17% (n=335/1944) did not report any healthcare professionals (physicians, community pharmacists or nurses) as their source of MI, and by 2014 the proportion had grown to 38% (n=639/1671). The use of the Internet as MI source increased rather steadily being 1% in 1999 and 16% in 2014.

Add figure 1 in here.

**Table 2.** Trends in the receipt of medicines information among adult medicine users. Results of age, gender, educational, number of medicines in use and number of diagnosed diseases adjusted logistic regression.

| Characteristics                                   | Study years <sup>a</sup> |                  |                  |                  |                  |                  |                  |                  |                  |                  | P-value <sup>b</sup> |
|---------------------------------------------------|--------------------------|------------------|------------------|------------------|------------------|------------------|------------------|------------------|------------------|------------------|----------------------|
|                                                   | 1999<br>n (%)            | 2002<br>n (%)    | 2005<br>n (%)    | 2008<br>n (%)    | 2009<br>n (%)    | 2010<br>n (%)    | 2011<br>n (%)    | 2012<br>n (%)    | 2013<br>n (%)    | 2014<br>n (%)    |                      |
| Respondents using medicines                       | 1944                     | 2000             | 2038             | 2101             | 1957             | 1871             | 1844             | 1759             | 1677             | 1671             |                      |
| Physician                                         | 1206 (62)                | 1186 (59)        | 1153 (57)        | 1050 (50)        | 950 (49)         | 953 (51)         | 933 (51)         | 839 (48)         | 816 (49)         | 785 (47)         |                      |
| OR (95% CI)                                       | 1                        | 0.80 (0.70-0.91) | 0.63 (0.55-0.72) | 0.43 (0.37-0.49) | 0.39 (0.34-0.45) | 0.45 (0.39-0.52) | 0.43 (0.37-0.49) | 0.37 (0.32-0.43) | 0.40 (0.34-0.46) | 0.36 (0.31-0.41) | <0.0001              |
| Community pharmacist                              | 892 (46)                 | 912 (46)         | 901 (44)         | 861 (41)         | 812 (42)         | 842 (45)         | 825 (45)         | 760 (43)         | 793 (47)         | 759 (46)         |                      |
| OR (95% CI)                                       | 1                        | 0.92 (0.81-1.04) | 0.82 (0.72-0.93) | 0.68 (0.59-0.77) | 0.67 (0.59-0.77) | 0.79 (0.70-0.91) | 0.78 (0.68-0.89) | 0.72 (0.63-0.82) | 0.86 (0.75-0.99) | 0.78 (0.68-0.90) | <0.0001              |
| Package leaflet <sup>c</sup>                      | -                        | 876 (44)         | 782 (38)         | 745 (36)         | 685 (35)         | 620 (33)         | 618 (34)         | 572 (33)         | 3 (<1)           | 566 (34)         |                      |
| OR (95% CI)                                       | -                        | 1                | 0.76 (0.66-0.86) | 0.65 (0.57-0.74) | 0.62 (0.54-0.71) | 0.57 (0.50-0.65) | 0.58 (0.51-0.67) | 0.55 (0.47-0.63) | 0.61 (0.53-0.70) | 0.58 (0.50-0.67) | <0.0001              |
| Nurse                                             | 274 (14)                 | 307 (15)         | 254 (13)         | 297 (14)         | 257 (13)         | 243 (13)         | 258 (14)         | 247 (14)         | 232 (14)         | 228 (14)         |                      |
| OR (95% CI)                                       | 1                        | 1.06 (0.89-1.28) | 0.78 (0.65-0.94) | 0.84 (0.70-1.01) | 0.75 (0.62-0.91) | 0.76 (0.62-0.92) | 0.84 (0.69-1.02) | 0.85 (0.70-1.03) | 0.83 (0.68-1.01) | 0.78 (0.64-0.96) | 0.003                |
| Books/newspapers                                  | 292 (15)                 | 247 (12)         | 203 (10)         | 125 (6)          | 112 (6)          | 104 (6)          | 137 (7)          | 94 (5)           | 111 (7)          | 91 (5)           |                      |
| OR (95% CI)                                       | 1                        | 0.75 (0.62-0.90) | 0.56 (0.46-0.68) | 0.31 (0.25-0.39) | 0.29 (0.23-0.37) | 0.28 (0.22-0.36) | 0.39 (0.31-0.49) | 0.27 (0.21-0.35) | 0.34 (0.27-0.43) | 0.27 (0.21-0.35) | <0.0001              |
| Relatives/friends                                 | 269 (14)                 | 213 (11)         | 184 (9)          | 127 (6)          | 160 (8)          | 130 (7)          | 145 (8)          | 120 (7)          | 125 (8)          | 112 (7)          |                      |
| OR (95% CI)                                       | 1                        | 0.73 (0.60-0.89) | 0.61 (0.50-0.76) | 0.40 (0.32-0.50) | 0.54 (0.44-0.67) | 0.46 (0.36-0.58) | 0.51 (0.41-0.64) | 0.46 (0.37-0.58) | 0.51 (0.41-0.65) | 0.44 (0.34-0.56) | <0.0001              |
| Internet                                          | 26 (1)                   | 68 (3)           | 157 (8)          | 243 (12)         | 243 (12)         | 261 (14)         | 276 (15)         | 267 (15)         | 283 (17)         | 262 (16)         |                      |
| OR (95% CI)                                       | 1                        | 2.46 (1.56-3.90) | 5.57 (3.65-8.49) | 8.44 (5.59-12.8) | 8.84 (5.85-13.4) | 10.2 (6.79-15.5) | 11.0 (7.26-16.5) | 11.3 (7.52-17.1) | 12.9 (8.53-19.4) | 11.5 (7.60-17.3) | <0.0001              |
| Advertisements                                    | 180 (9)                  | 135 (7)          | 137 (7)          | 66 (3)           | 57 (3)           | 51 (3)           | 69 (4)           | 50 (3)           | 60 (4)           | 41 (3)           |                      |
| OR (95% CI)                                       | 1                        | 0.71 (0.56-0.90) | 0.74 (0.58-0.93) | 0.33 (0.25-0.45) | 0.31 (0.23-0.42) | 0.29 (0.21-0.40) | 0.39 (0.29-0.52) | 0.30 (0.22-0.42) | 0.38 (0.28-0.51) | 0.25 (0.18-0.36) | <0.0001              |
| Radio/television                                  | 130 (7)                  | 127 (6)          | 101 (5)          | 55 (3)           | 50 (3)           | 57 (3)           | 81 (4)           | 43 (2)           | 60 (4)           | 43 (3)           |                      |
| OR (95% CI)                                       | 1                        | 0.90 (0.69-1.16) | 0.68 (0.51-0.89) | 0.34 (0.25-0.48) | 0.33 (0.24-0.47) | 0.40 (0.29-0.56) | 0.57 (0.43-0.77) | 0.32 (0.22-0.45) | 0.47 (0.34-0.65) | 0.33 (0.23-0.47) | <0.0001              |
| Health food stores                                | 141 (7)                  | 141 (7)          | 136 (7)          | 88 (4)           | 79 (4)           | 77 (4)           | 90 (5)           | 66 (4)           | 77 (5)           | 66 (4)           |                      |
| OR (95% CI)                                       | 1                        | 0.94 (0.73-1.20) | 0.88 (0.68-1.13) | 0.52 (0.39-0.69) | 0.50 (0.37-0.66) | 0.51 (0.38-0.61) | 0.59 (0.51-0.79) | 0.46 (0.36-0.62) | 0.57 (0.42-0.76) | 0.48 (0.35-0.65) | <0.0001              |
| Telephone services <sup>c</sup>                   | -                        | 4 (<1)           | 5 (<1)           | 6 (<1)           | 7 (<1)           | 1 (<1)           | 4 (<1)           | 3 (<1)           | 3 (<1)           | 5 (<1)           |                      |
| OR (95% CI)                                       | -                        | 1                | 1.28 (0.34-4.79) | 1.22 (0.32-4.60) | 1.81 (0.52-6.30) | 0.28 (0.03-2.53) | 1.15 (0.28-4.69) | 0.91 (0.20-4.11) | 0.64 (0.12-3.52) | 1.52 (0.40-5.77) | 0.784                |
| MI received from at least one source <sup>d</sup> | 1867 (96)                | 1804 (90)        | 1762 (87)        | 1571 (75)        | 1404 (72)        | 1392 (74)        | 1393 (76)        | 1236 (70)        | 1233 (74)        | 1204 (72)        |                      |
| OR (95% CI)                                       | 1                        | 0.33 (0.25-0.44) | 0.21 (0.16-0.28) | 0.09 (0.07-0.11) | 0.07 (0.06-0.09) | 0.09 (0.07-0.11) | 0.09 (0.07-0.12) | 0.07 (0.05-0.09) | 0.08 (0.06-0.10) | 0.07 (0.06-0.10) | <0.0001              |

<sup>a</sup>Calculated from study years available, <sup>b</sup>P-value for the difference in the receipt of medicines information between the study years, <sup>c</sup>Added to the survey instrument in 2002, <sup>d</sup>Medicines information (MI) sources listed in the survey. OR = Age, gender, educational, number of medicines in use and number of diagnosed diseases adjusted odds ratio; CI = 95% confidence intervals of logistic regression.

1  
2  
3 The number of MI sources from which medicine users reported receipt of MI changed over the study  
4 period 1999-2014 (Fig. 2). The most noticeable decreases occurred in those who reported receipt of MI  
5 from one (47% to 21%) or two (30 % to 22%) sources. The number of medicine users receiving MI  
6 from more than two sources increased moderately. In 1999, of the medicine users 4% (n=77/1944) did  
7 not report receipt of MI from any of the information sources listed in the survey, while this proportion  
8 had increased to 28% (n=467/1671) in 2014.  
9  
10  
11  
12

13  
14 Add figure 2 in here.  
15  
16

### 17 **Receipt of medicines information among subgroups**

18  
19

20 Women reported receiving MI from all information sources listed in the survey more commonly than  
21 men during the study period (Appendix A). Receipt of MI from physicians decreased most among  
22 women (66% to 48%) and among medicine users aged over 45 years (75% to 52%). Receipt of MI from  
23 package leaflets decreased both in women (48% to 38%) and men (36% to 26%), while remained nearly  
24 unchanged from community pharmacists (51% to 47% in women vs. 37% to 42% in men). The receipt  
25 of MI from community pharmacists increased most among medicine users aged 55-64 years (34% to  
26 46%), and decreased most among medicine users aged 33-44 years (55% to 43%). Package leaflets,  
27 relatives and friends were reported to be most common MI sources for medicine users under 25 years,  
28 although receipt of MI from package leaflets (59% to 37%) and from relatives and friends (35% to 16%)  
29 decreased most in this age group. Receipt of MI from the Internet increased in both genders, slightly  
30 more in women than in men (2% to 18% vs. 1% to 12%, respectively), and in all age groups, most  
31 among medicine users aged 25-34 years (2% to 21%) and 15-24 years (2% to 20%). More male (6% to  
32 33%) than female (3% to 25%) and more medicine users under 45 years (5% to 33%) than medicine  
33 users 45 years or older (3% to 25%) did not report receipt of MI from any of the information sources  
34 listed in the survey during the study period.  
35  
36  
37  
38  
39  
40  
41  
42  
43  
44  
45

46 As the number of medicines in use or the number of diagnosed diseases increased, the number of  
47 different MI sources increased (Appendix B). However, the opposite changes occurred in the receipt of  
48 MI from physicians, the proportion of medicine users receiving MI from physicians decreased 14-26%  
49 depending on the number of medicines in use or the number of diagnosed diseases, the highest decline  
50 occurring for medicine users with two medicines (76% to 52%) and for medicine users with two  
51 diagnosed diseases (83% to 57%). The number of medicines and the number of diagnosed diseases had  
52 the opposite influence on the receipt of MI from community pharmacists. The receipt of MI from  
53 community pharmacists increased most in medicine users with three medicines (47% to 59%) and in  
54 those with three or more diagnosed diseases (49% to 63%), whereas the receipt of MI decreased most  
55 in medicine users with one medicine (44% to 38%) and in those medicine users without any diagnosed  
56  
57  
58  
59  
60

1  
2  
3 diseases (45% to 34%). Receipt of MI package leaflets decreased mainly in all medicine users, most in  
4 those with one (40% to 28%) or two (48% to 35%) medicines in use and in medicine users without any  
5 diagnosed diseases (44% to 30%) or in those with one diagnosed disease (43% to 31%). Receipt of MI  
6 from the Internet increased in all medicine users regardless the number of medicines in use or the  
7 number of diagnosed diseases, most among respondents with two (1% to 19%) and four or more  
8 medicines (5% to 22%), and respondents with three or more diagnosed diseases (3% to 23%).  
9 Respondents using one (6% to 35%) or two (1% to 24%) medicines and medicine users without any  
10 diagnosed disease listed in the survey (5% to 38%) or with one disease (2% to 25%) most commonly  
11 did not report receipt of MI from any of the information sources listed in the survey during the study  
12 period.  
13  
14  
15  
16  
17  
18  
19

20  
21 Overall, the mean number of medicines in use and the mean number of diagnosed diseases increased  
22 slightly among medicine users, while the mean number of MI sources from which MI was received  
23 remained relatively stable during the study period 1999-2014 (Fig. 3). The ratio between the mean  
24 number of medicines in use and the mean number of MI sources from which MI was received remained  
25 relatively stable, but the ratio between the mean number of diagnosed diseases and the mean number of  
26 MI sources increased.  
27  
28  
29

30  
31 Add figure 3. in here.  
32  
33  
34  
35

## 36 DISCUSSION

37  
38  
39 To our knowledge, this is the first study analysing long-term national trends in the receipt of MI among  
40 adult population. The 15-year period covered in this study (1999-2014) provides unique insights into  
41 how improved consumer access to MI and the shift from paper to cyber have influenced receipt of MI  
42 from various sources. It seems that the key MI sources (physicians, community pharmacists, package  
43 leaflets) have remained similar which is in line with previous studies.<sup>21-47</sup> Surprising was that even  
44 though the availability and the use of MI sources has diversified among the adult population, an  
45 increasing number of medicine users did not report receipt of MI from any of the sources.  
46  
47  
48  
49

50  
51  
52 The proportion of medicine users who did not report receiving MI from any of the listed sources became  
53 7-fold during the study period (4% to 28%). Furthermore, the proportion of those who did not report  
54 receiving MI on medicines they used from any of the healthcare professionals more than doubled from  
55 17% in 1999 to 38% in 2014. Particularly, MI received from the physicians declined over time. The  
56 decline was similar (22-26%) in respondents using 2 or more medicines or having or not having  
57 diagnosed diseases. According to age, the decline was most evident among medicine users 45 years and  
58  
59  
60

1  
2  
3 older. These findings may indicate that physicians are becoming less involved in actual patient care as  
4 the healthcare has become more fragmented. Thus, time allocated for physician office visits has  
5 shortened, leading to a situation that physicians do not have time to concentrate on their patients'  
6 medications.<sup>61-64</sup> Consequently, those medicine users who were dependent on MI received from their  
7 physicians do not have that source available anymore. It also seems that community pharmacists have  
8 become more common sources of MI for people with multiple medications instead of physicians, but  
9 nurses have not replaced physicians as a MI source. In the future, special attention should be paid to the  
10 receipt of MI among people with multiple diseases and medications and the aging populations whose  
11 proportion is growing.  
12  
13  
14  
15  
16  
17  
18

19 Our findings indicate that MI is not evenly distributed among medicine users, it may have become more  
20 unevenly distributed over time. During the study period, women, people aged 45 years or older, people  
21 with three or more medicines in use and people with three or more diagnosed diseases received MI  
22 more commonly on their medicines than other adult medicine users. These findings are in line with  
23 previous cross-sectional studies.<sup>23,25,26,40,41</sup> Other previous studies have shown that MI seeking behavior  
24 and the use of MI sources is usually influenced by gender and age, but also education, ethnic  
25 background, income, employment, health status and medical history.<sup>27,34,39</sup> Potential reasons and  
26 system-based root causes for differences in the receipt of MI among medicine users need to be addressed  
27 in future research. Our example from Finland demonstrates that availability of a wide range of MI  
28 sources does not necessarily guarantee their actual and evenly distributed use among medicine users.  
29  
30  
31  
32  
33  
34  
35

36 This study indicates that the receipt of MI from the Internet was quite rare as more than 90% of the  
37 Finns aged 16-64 years were Internet users in 2014.<sup>65</sup> There are no similar population-based long-term  
38 trend studies from other countries to compare our results. According to previous studies, use of the  
39 Internet as a source of MI has varied between 4% and 29% in the 2000s.<sup>22,25,31,33,34,39,40,42,44-46</sup> It is also  
40 known that some patient and medicine user groups use the Internet considerably more (59-68%) than  
41 the adult population in general, e.g. patients with chronic conditions and pregnant women.<sup>27,28,41</sup> Thus,  
42 if we want to reach the majority of the adult population, we could not solely count on the Internet-based  
43 MI sources and services. Further population-based research is needed to get a more comprehensive  
44 understanding of the importance and usage patterns of the Internet as a MI source, also the opportunities  
45 it provides for improving MI for various medication user segments.  
46  
47  
48  
49  
50  
51  
52  
53  
54  
55  
56  
57  
58  
59  
60



### Strengths and limitations of this study

As a repeated national population survey, this study allows for examination of trends over time at the population level. Although the response rate decreased from 67% to 53% during the study period, reflecting that the representativeness of the results to the entire population is getting weaker, it is still adequate for generalizable results.<sup>66,67</sup> The non-respondents more often tended to be young men, unmarried or single and with a lower level of education.<sup>55</sup> Due to the cross-sectional method without cohorts, it is not possible to follow up changes in the receipt of MI over time at the individual level. The respondents did not have the opportunity to report MI from other sources than those listed in the survey, to report separately MI sources on prescription and non-prescription medicines, and to distinguish between active MI seeking or passive receipt of MI. This should be taken account when interpreting results and potential implications. For example, the gender difference in the use of MI sources may differ depending on whether these are discrepancies in the information being provided or gender differences in information seeking-behaviors.<sup>23,25,26,33,40,41,45</sup> Furthermore, people using prescription vs. non-prescription medicines may differ in the amount and use of different MI sources. However, in Finland all medicine users should receive MI from their healthcare providers while prescribing and dispensing both prescription and non-prescription medicines.<sup>68,69</sup> The data did not provide any information about the quality, validity or amount of the MI received.

### Implications and future research

The strategic development of MI will continue both nationally and internationally to ensure the availability and access to reliable, up-to-date and high quality MI and MI sources.<sup>2,4,13,70</sup> As part of this work, it is necessary to continue research on trends in the receipt of MI at the population level and to identify population groups needing special attention, such as older adults. Consumers' MI literacy should be further investigated and considered in the development of MI for different patient and medicine user groups, e.g. by including the question related to MI literacy in population surveys. The present study provides a foundation for further analysis that could go deeper in understanding receipt of MI in various population groups, changes over time and factors influencing it. Further studies are needed also on factors contributing to a growing number of medicine users not receiving MI from any sources.

## CONCLUSIONS

Healthcare professionals and package leaflets had still a dominating importance in 2014 despite the growing number of MI sources over time, but still a minority of adult medicine users reported receiving MI via the Internet in 2014. Worrying is that the proportion of adult medicine users who did not receive MI from any of the sources became 7-fold during the study period.

For peer review only

1  
2  
3 We thank the National Institute for Health and Welfare for providing their incidence data and  
4 participants of the national surveys. We gratefully acknowledge the Elli Turunen Fund of the Finnish  
5 Cultural Foundation for providing funding. We warmly thank Tero Vahlberg for statistical support and  
6 Richard Stevenson for proofreading the manuscript.  
7

8  
9 **Contributors:** SH has been involved in designing the survey. SH and MA have been involved in  
10 developing the survey instrument concerning the receipt of medicines information. NM, MA, KH and  
11 MPM planned the analysis and reporting this particular study. The data were applied from the  
12 National Institute for Health and Welfare. NM performed the data analysis, and MA, KH, SH and  
13 MPM contributed in the interpretation of the data. NM prepared the initial draft of the manuscript.  
14 MA, KH, SH and MPM critically reviewed and revised the manuscript. All authors read and gave the  
15 final approval of the version to be published.  
16  
17

18 **Funding:** This research was supported by the Elli Turunen Fund of the Finnish Cultural Foundation.  
19

20  
21 **Competing interests:** None declared.  
22

23 **Patient consent:** Not required.  
24

25  
26 **Ethical approval:** As this study was a secondary analysis using routinely collected and fully  
27 anonymized data, ethics approval was not applicable. Answering the survey was considered as giving  
28 informed consent. The study followed the national ethical guidelines for researchers<sup>60</sup>. All study  
29 procedures were conducted in accordance with good research practice.  
30

31 **Data sharing:** No additional data available.  
32  
33  
34  
35  
36  
37  
38  
39  
40  
41  
42  
43  
44  
45  
46  
47  
48  
49  
50  
51  
52  
53  
54  
55  
56  
57  
58  
59  
60

## REFERENCES

- 1 Bailey SC, Belter LT, Pandit AU, et al. The availability, functionality, and quality of mobile  
2 applications supporting medication self-management. *J Am Med Inform Assoc* 2014;21:542–6.  
3 doi:10.1136/amiajnl-2013-002232 [published Online First: 25 October 2013].
- 4  
5  
6  
7  
8  
9  
10  
11 2 Finnish Medicines Agency Fimea. Rational use of medicines through information and guidance.  
12 Medicines information services: Current state and strategy for 2020. *Serial Publication Fimea*  
13 *Develops, Assesses and Informs* 1/2012. 2012.  
14 [https://www.fimea.fi/documents/542809/838272/21513\\_KAI\\_JULKAISUSARJA\\_Laakeinformatios](https://www.fimea.fi/documents/542809/838272/21513_KAI_JULKAISUSARJA_Laakeinformatios)  
15 [trategia\\_1\\_2012\\_eng\\_links.pdf](https://www.fimea.fi/documents/542809/838272/21513_KAI_JULKAISUSARJA_Laakeinformatios) (accessed 23 Aug 2018).
- 16  
17  
18 3 Ho I, Nielsen L, Jacobsgaard H, et al. Chat-based telepharmacy in Denmark: Design and early  
19 results. *Int J Pharm Pract* 2015;23:61–6. doi:10.1111/ijpp.12109 [published Online First: 17 March  
20 2014].
- 21  
22 4 International Pharmaceutical Federation. Medicines information: Strategic development. The  
23 Hague: International Pharmaceutical Federation. 2017. [https://fip.org/files/fip/publications/2017-01-](https://fip.org/files/fip/publications/2017-01-Medicines-information-strategic-development.pdf)  
24 [Medicines-information-strategic-development.pdf](https://fip.org/files/fip/publications/2017-01-Medicines-information-strategic-development.pdf) (accessed 21 Jun 2018).
- 25  
26 5 Lee K, Hoti K, Hughes JD, et al. Dr Google and the consumer: A qualitative study exploring the  
27 navigational needs and online health information-seeking behaviors of consumers with chronic health  
28 conditions. *J Med Internet Res* 2014;16:e262. doi:10.2196/jmir.3706 (accessed 23 Aug 2018).
- 29  
30 6 Mononen N, Järvinen R, Hämeen-Anttila K, et al. A national approach to medicines information  
31 research: A systematic review. *Res Soc Adm Pharm* 2018;14:1106–24.  
32 doi:10.1016/j.sapharm.2018.01.011 [published Online First: 31 January 2018].
- 33  
34 7 Pohjanoksa-Mäntylä M. Medicines information sources and services for consumers: A special focus  
35 on the Internet and people with depression [dissertation]. University of Helsinki. 2010.  
36 <http://urn.fi/URN:ISBN:978-952-10-6128-8> (accessed 23 Aug 2018).
- 37  
38 8 Benetoli A, Chen TF, Spagnardi S, et al. Provision of a medicines information service to consumers  
39 on Facebook: An Australian case study. *J Med Internet Res* 2015;17:e265. doi:10.2196/jmir.4161  
40 (accessed 23 Aug 2018).
- 41  
42 9 Eysenbach G, Powell J, Englesakis M, et al. Health related virtual communities and electronic  
43 support groups: Systematic review of the effects of online peer to peer interactions. *BMJ*  
44 2004;328:1166. doi:10.1136/bmj.328.7449.1166 [published Online First: 13 May 2004].
- 45  
46 10 Hanlon P, Daines L, Campbell C, et al. Telehealth interventions to support self-management of  
47 long-term conditions: A systematic metareview of diabetes, heart failure, asthma, chronic obstructive  
48 pulmonary disease, and cancer. *J Med Internet Res* 2017;19:e172. doi:10.2196/jmir.6688 (accessed 23  
49 Aug 2018).
- 50  
51 11 Department of Health. Better information, better choices, better health: Putting information at the  
52 centre of health. 2004.  
53 [http://www.formazione.eu.com/\\_documents/consenso/documenti/better%20information.pdf](http://www.formazione.eu.com/_documents/consenso/documenti/better%20information.pdf) (accessed  
54 21 Jun 2018).
- 55  
56 12 Department of Health. The power of information: Putting all of us in control of the health and care  
57 information we need. 2012.  
58 [https://data.gov.uk/sites/default/files/DH%20Open%20Data%20Strategy\\_10.pdf](https://data.gov.uk/sites/default/files/DH%20Open%20Data%20Strategy_10.pdf) (accessed 21 Jun  
59 2018).
- 60

1  
2  
3 13 European Commission. High Level Pharmaceutical Forum 2005-2008: Conclusions and  
4 recommendations. European Communities. 2008. doi:10.2772/22720 (accessed 21 Jun 2018).  
5

6 14 Ministry of Health and Social Affairs. The national pharmaceutical strategy 2016–2018.  
7 Government Offices of Sweden. 2015. [https://lakemedelsverket.se/upload/om-](https://lakemedelsverket.se/upload/om-lakemedelsverket/NLS/The-National-Pharmaceutical-Strategy-2016-2018.pdf)  
8 [lakemedelsverket/NLS/The-National-Pharmaceutical-Strategy-2016-2018.pdf](https://lakemedelsverket.se/upload/om-lakemedelsverket/NLS/The-National-Pharmaceutical-Strategy-2016-2018.pdf) (accessed 21 Jun 2018).  
9

10 15 Ministry of Social Affairs and Health. Medicines Policy 2020: Towards efficient, safe, rational and  
11 cost effective use of medicines. Ministry of Social Affairs and Health. 2011.  
12 <http://urn.fi/URN:ISBN:978-952-00-3101-5> (accessed 21 Jun 2018).  
13

14 16 Pharmaceutical Society of Ireland. Future pharmacy practice in Ireland: Meeting patients' needs.  
15 2016.  
16 [https://www.thepsi.ie/Libraries/Pharmacy\\_Practice/PSI\\_Future\\_Pharmacy\\_Practice\\_in\\_Ireland.sflb.as](https://www.thepsi.ie/Libraries/Pharmacy_Practice/PSI_Future_Pharmacy_Practice_in_Ireland.sflb.aspx)  
17 [hx](https://www.thepsi.ie/Libraries/Pharmacy_Practice/PSI_Future_Pharmacy_Practice_in_Ireland.sflb.aspx) (accessed 21 Jun 2018).  
18

19 17 Finney Rutten LJ, Agunwamba AA, Wilson P, et al. Cancer-related information seeking among  
20 cancer survivors: Trends over a decade (2003-2013). *J Cancer Educ* 2016;31:348–57.  
21 doi:10.1007/s13187-015-0802-7 [published Online First: 26 February 2015].  
22

23 18 Kalantzi S, Kostagiolas P, Kechagias G, et al. Information seeking behavior of patients with  
24 diabetes mellitus: A cross-sectional study in an outpatient clinic of a university-affiliated hospital in  
25 Athens, Greece. *BMC Res Notes* 2015;8:48. doi:10.1186/s13104-015-1005-3 [published Online First:  
26 20 February 2015].  
27

28 19 Somera LP, Lee HR, Badowski G, et al. Health information seeking, source trust, and culture: A  
29 comparative analysis of health information trends and needs between Guam and the United States. *J*  
30 *Health Commun* 2016;21:469–78. doi:10.1080/10810730.2015.1095822 [published Online First: 16  
31 March 2016].  
32

33 20 Volkman JE, Luger TM, Harvey KLL, et al. The National Cancer Institute's Health Information  
34 National Trends Survey [HINTS]: A national cross-sectional analysis of talking to your doctor and  
35 other healthcare providers for health information. *BMC Fam Pract* 2014;15:111. doi:10.1186/1471-2296-  
36 15-111 [published Online First: 6 June 2014].  
37

38 21 Raynor DK, Savage I, Knapp P, et al. We are the experts: people with asthma talk about their  
39 medicines information needs. *Patient Educ Couns* 2004;53:167–74. doi:10.1016/S0738-  
40 3991(03)00126-5 [published Online First: 24 June 2003].  
41

42 22 Chen X, Siu LL. Impact of the media and the internet on oncology: survey of cancer patients and  
43 oncologists in Canada. *J Clin Oncol* 2001;19:4291–7. doi:10.1200/JCO.2001.19.23.4291 (accessed 21  
44 Jun 2018).  
45

46 23 Bults M, Beaujean DJMA, Wijkmans CJ, et al. Why did patients with cardiovascular disease in the  
47 Netherlands accept Q fever vaccination? *Vaccine* 2012;30:3369–75.  
48 doi:10.1016/j.vaccine.2012.03.056 [published Online First: 1 April 2012].  
49

50 24 Zukoski AP, Thorburn S, Stroud J. Seeking information about HIV/AIDS: A qualitative study of  
51 health literacy among people living with HIV/AIDS in a low prevalence context. *AIDS care*  
52 2011;23:1505–8. doi:10.1080/09540121.2011.582077 [published Online First: 14 June 2011].  
53

54 25 Pohjanoksa-Mäntylä M, Bell JS, Helakorpi S, et al. Is the Internet replacing health professionals?  
55 A population survey on sources of medicines information among people with mental disorders. *Soc*  
56 *Psychiatry Psychiatr Epidemiol* 2011;46:373–9. doi:10.1007/s00127-010-0201-7 [published Online  
57 First: 12 March 2010].  
58  
59  
60

- 1  
2  
3 26 Carpenter DM, DeVellis RF, Hogan SL, et al. Use and perceived credibility of medication  
4 information sources for patients with a rare illness: Differences by gender. *J Health Commun*  
5 2011;16:629–42. doi:10.1080/10810730.2011.551995 [published Online First: 1 June 2011].  
6  
7 27 Hämeen-Anttila K, Jyrkkä J, Enlund H, et al. Medicines information needs during pregnancy: A  
8 multinational comparison. *BMJ Open* 2013;3:e002594. doi:10.1136/bmjopen-2013-002594 (accessed  
9 21 Jun 2018).  
10  
11 28 Hämeen-Anttila K, Nordeng H, Kokki E, et al. Multiple information sources and consequences of  
12 conflicting information about medicine use during pregnancy: A multinational Internet-based survey.  
13 *J Med Internet Res* 2014;16:e60. doi:10.2196/jmir.2939 (accessed 21 Jun 2018).  
14  
15 29 Tiihonen MJ, Heikkinen AM, Ahonen RS. Do Finnish women using hormone replacement therapy  
16 need more information about risks. *Pharm World Sci* 2007;29:635–40. doi:10.1007/s11096-007-  
17 9115-1 [published Online First: 12 April 2007].  
18  
19 30 Tiihonen M, Saarela M, Saarinen S, et al. Menopausal hormone therapy — Benefits, adverse  
20 reactions, concerns and information sources in 2009. *Maturitas* 2011;70:69–73.  
21 doi:10.1016/j.maturitas.2011.06.001 [published Online First: 1 July 2011].  
22  
23 31 Wathen CN. Health information seeking in context: How women make decisions regarding  
24 hormone replacement therapy. *J Health Commun* 2006;11:477–93. doi:10.1080/10810730600751979  
25 [published Online First: 15 August 2006].  
26  
27 32 Ngo SNT, Stupans I, Leong WS, et al. Appropriate use of non-prescription ibuprofen: A survey of  
28 patients' perceptions and understanding. *Int J Pharm Pract* 2010;18:63–5.  
29 doi:10.1211/ijpp.18.01.0011 [published Online First: 22 March 2010].  
30  
31 33 Närhi U, Helakorpi S. Analgesic users' sources of medicine information. *Int J Pharm Pract*  
32 2007;15:251–3. doi:10.1211/ijpp.15.3.0013 (accessed 21 Jun 2018).  
33  
34 34 Sleath B, Wurst K, Lowery T. Drug information sources and antidepressant adherence. *Community*  
35 *Ment Health J* 2003;39:359–68. doi:10.1023/A:1024080410284 (accessed 21 Jun 2018).  
36  
37 35 Baldwin AS, Cvangros JA, Christensen AJ, et al. Preferences for a patient-centered role  
38 orientation: Association with patient-information-seeking behavior and clinical markers of health. *Ann*  
39 *Behav Med* 2008;35:80–6. doi:10.1007/s12160-007-9011-x (accessed 21 Jun 2018).  
40  
41 36 Gordon K, Smith F, Dhillon S. Effective chronic disease management: Patients' perspectives on  
42 medication-related problems. *Patient Educ Couns* 2007;65:407–15. doi:10.1016/j.pec.2006.09.012  
43 [published Online First: 1 November 2006].  
44  
45 37 Black E, Murphy AL, Gardner DM. Community pharmacists services for people with mental  
46 illnesses: Preferences, satisfaction, and stigma. *Psychiatr Serv* 2009;60:1123–7.  
47 doi:10.1176/ps.2009.60.8.1123 (accessed 21 Jun 2018).  
48  
49 38 Carter SR, Moles R, White L, et al. Medication information seeking behavior of patients who use  
50 multiple medicines: How does it affect adherence? *Patient Educ Couns* 2013;92:74–80.  
51 doi:10.1016/j.pec.2013.01.019 [published Online First: 22 February 2013].  
52  
53 39 DeLorme DE, Huh J, Reid LN. Source selection in prescription drug information seeking and  
54 influencing factors: Applying the comprehensive model of information seeking in an American  
55 context. *J Health Commun* 2011;16:766–87. doi:10.1080/10810730.2011.561914 [published Online  
56 First: 24 May 2011].  
57  
58  
59  
60

- 1  
2  
3 40 Ho CH, Ko Y, Tan ML. Patient needs and sources of drug information in Singapore: Is the internet  
4 replacing former sources? *Ann Pharmacother* 2009;43:732–9. doi:10.1345/aph.1L580 [published  
5 Online First: 31 March 2009].  
6
- 7 41 Hämeen-Anttila K, Pietilä K, Pylkkänen L, et al. Internet as a source of medicines information  
8 (MI) among frequent internet users. *Res Soc Adm Pharm* 2018;14:758–64.  
9 doi:10.1016/j.sapharm.2017.09.007 [published Online First: 30 September 2017].  
10
- 11 42 Krska J, Morecroft CW. Patients' use of information about medicine side effects in relation to  
12 experiences of suspected adverse drug reactions: A cross-sectional survey in medical in-patients.  
13 *Drug saf* 2013;36:673–80. doi:10.1007/s40264-013-0065-3 [published Online First: 23 My 2013].  
14
- 15 43 Newby DA, Hill SR, Barker BJ, et al. Drug information for consumers: should it be disease or  
16 medication specific? Results of a community survey. *Aust N Z J Public Health* 2001;25:564–70.  
17 doi:10.1111/j.1467-842X.2001.tb00327.x (accessed 21 Jun 2018).  
18
- 19 44 Närhi U. Sources of medicine information and their reliability evaluated by medicine users. *Pharm*  
20 *World Sci* 2007;29:688–94. doi:10.1007/s11096-007-9131-1 [published Online First: 4 May 2007].  
21
- 22 45 Närhi U, Helakorpi S. Sources of medicine information in Finland. *Health Policy* 2007;84:51–7.  
23 doi:10.1016/j.healthpol.2007.05.005 [published Online First: 27 June 2007].  
24
- 25 46 Tio J, LaCaze A, Neil Cottrell WN. Ascertaining consumer perspectives of medication information  
26 sources using a modified repertory grid technique. *Pharm World Sci* 2007;29:73–80.  
27 doi:10.1007/s11096-006-9076-9 [published Online First: 23 December 2006].  
28
- 29 47 Tiihonen M, Heikkinen AM, Leppänen HM, et al. Information sources used by women in Finland  
30 who use hormonal contraceptives. *Pharm World Sci* 2010;32:66–72. doi:10.1007/s11096-009-9344-6  
31 [published Online First: 30 October 2009].  
32
- 33 48 Puumalainen I. Development of instruments to measure the quality of patient counselling  
34 [dissertation]. University of Kuopio. 2005. <http://urn.fi/URN:ISBN:951-27-0053-0> (accessed 20 Dec  
35 2018).  
36
- 37 49 Council Directive 92/27/EEC of 31 March 1992 on the labelling of medicinal products for human  
38 use and on package leaflets. Council of the European Communities. 1992.  
39 <http://data.europa.eu/eli/dir/1992/27/oj> (accessed 23 Aug 2018).  
40
- 41 50 Finnish Medicine Agency Fimea. SmPCs and PLs.  
42 [www.fimea.fi/web/en/databases\\_and\\_registeries/spcs](http://www.fimea.fi/web/en/databases_and_registeries/spcs) (accessed 21 Jun 2018).  
43
- 44 51 Pharmaceutical Information Centre. Package leaflets of medicinal products. Finnish.  
45 <https://laakeinfo.fi/Frontpage.aspx> (accessed 21 Jun 2018).  
46
- 47 52 Helldán A, Helakorpi S, editors. Health behaviour and health among the Finnish adult population,  
48 Spring 2014. National Institute for Health and Welfare. 2015. [http://urn.fi/URN:ISBN:978-952-302-  
49 447-2](http://urn.fi/URN:ISBN:978-952-302-447-2) (accessed 23 Aug 2018).  
50
- 51 53 Puska P, Vartiainen E, Nissinen A, et al. Background, principles, implementation, and general  
52 experiences of the North Karelia Project. *Glob Heart* 2016;11:173–8.  
53 doi:10.1016/j.ghheart.2016.04.010 (accessed 11 Dec 2018).  
54
- 55 54 Population Register Centre. <https://vrk.fi/en/population-register-centre> (accessed 20 Dec 2018).  
56  
57  
58  
59  
60

- 1  
2  
3 55 Tolonen H, Helakorpi S, Talala K, et al. 25-year trends and socio-demographic differences in  
4 response rates: Finnish adult health behaviour survey. *Eur J Epidemiol* 2006;21:409–15.  
5 doi:10.1007/s10654-006-9019-8 [published Online First: 28 June 2006].  
6
- 7 56 Gama H, Correia S, Lunet N. Questionnaire design and the recall of pharmacological treatments.  
8 *Pharmacoepidemiol Drug Saf* 2009;18:175-87. doi:10.1002/pds.1703 [published Online First: 30  
9 December 2008].  
10
- 11 57 Airaksinen M. Customer feedback as a tool for improving pharmacy services in Finland  
12 [dissertation]. University of Kuopio. 1996.  
13
- 14 58 Airaksinen M, Ahonen R, Enlund H. The questions to ask about your medicines campaign — An  
15 evaluation of pharmacists and the public's response. *Med Care* 1998;36:422–7.  
16
- 17 59 Vainio K, Airaksinen M, Väisänen T, et al. Assessing the importance of community pharmacists as  
18 providers of drug information. *J Appl Ther Res* 2004;5:24–9.  
19
- 20 60 Finnish National Advisory Board on Research Ethics. Ethical principles of research in the  
21 humanities and social and behavioural sciences and proposals for ethical review. 2009.  
22 www.tenk.fi/sites/tenk.fi/files/ethicalprinciples.pdf (accessed 21 Jun 2018).  
23
- 24 61 Guy Jr GP, Richardson LC. Visit duration for outpatient physician office visits among patients  
25 with cancer. *J Oncol Pract* 2012;8:2–8s. doi:10.1200/JOP.2011.000493 (accessed 1 Dec 2018).  
26
- 27 62 Kallio S, Kumpusalo-Vauhkonen A, Järvensivu T., et al. Towards interprofessional networking in  
28 medication management of the aged: current challenges and potential solutions in Finland. *Scand J*  
29 *Prim Health Care* 2016;34:368-76. doi:10.1080/02813432.2016.1249055 [published Online First: 8  
30 November 2016].  
31
- 32 63 Kangaspunta V, Koskela T, Soini E, et al. Factors impacting the perceived usefulness of a patient's  
33 health centre visit. *Suom Laakaril* 2014;69:1654–9.  
34
- 35 64 Shaw MK, Davis SA, Fleischer AB, et al. The duration of office visits in the United States, 1993 to  
36 2010. *Am J Manag Care* 2014;20:820–6.  
37
- 38 65 Statistics Finland. One half of Finnish residents participate in social network services.  
39 [https://www.stat.fi/til/sutivi/2014/sutivi\\_2014\\_2014-11-06\\_tie\\_001\\_en.html](https://www.stat.fi/til/sutivi/2014/sutivi_2014_2014-11-06_tie_001_en.html) (accessed 30 Nov 2018).  
40
- 41 66 Baruch Y, Holtom BC. Survey response rate levels and trends in organizational research. *Hum*  
42 *Relat* 2008;61:1139–60. doi:10.1177%2F0018726708094863 [published Online First: 1 August  
43 2008].  
44
- 45 67 Tolonen H, Helakorpi S, Talala K, et al. 25-year trends and socio-demographic differences in  
46 response rates: Finnish adult health behaviour survey. *Eur J Epidemiol* 2006;21:409–15.  
47 doi:10.1007/s10654-006-9019-8 [published Online First: 28 June 2006].  
48
- 49 68 Decree on the prescription of medicines 1088/2010.  
50 <https://www.finlex.fi/fi/laki/alkup/2010/20101088> (accessed 1 Dec 2018).  
51
- 52 69 Medicines Act 395/1987. <https://www.finlex.fi/fi/laki/ajantasa/1987/19870395> (accessed 1 Dec  
53 2018).  
54
- 55 70 European Commission. High Level Group on innovation and provision of medicines in the  
56 European Union: Recommendations for action. G10 Medicines report, European Communities. 2002.  
57 [http://ec.europa.eu/health/ph\\_overview/Documents/key08\\_en.pdf](http://ec.europa.eu/health/ph_overview/Documents/key08_en.pdf) (accessed 21 Jun 2018).  
58  
59  
60



## LEGENDS OF THE FIGURES

Figure 1 Trends in the receipt of medicines information among adult medicine users (n=18862) in 1999-2014 (% of the respondents who reported use of at least one prescription or non-prescription medicine within 7 days prior to the survey). The survey was not conducted in 2000, 2001, 2003, 2004, 2006 and 2007.

Figure 2 Number of medicines information sources from which the adult medicine users (n=18862) had received information on the medicines they used. The survey was not conducted in 2000, 2001, 2003, 2004, 2006 and 2007.

Figure 3 Ratio between mean number of medicines in use and mean number of diagnosed diseases compared to the mean number of medicines information sources from which the medicine users (n=18862) received medicines information. The survey was not conducted in 2000, 2001, 2003, 2004, 2006 and 2007.

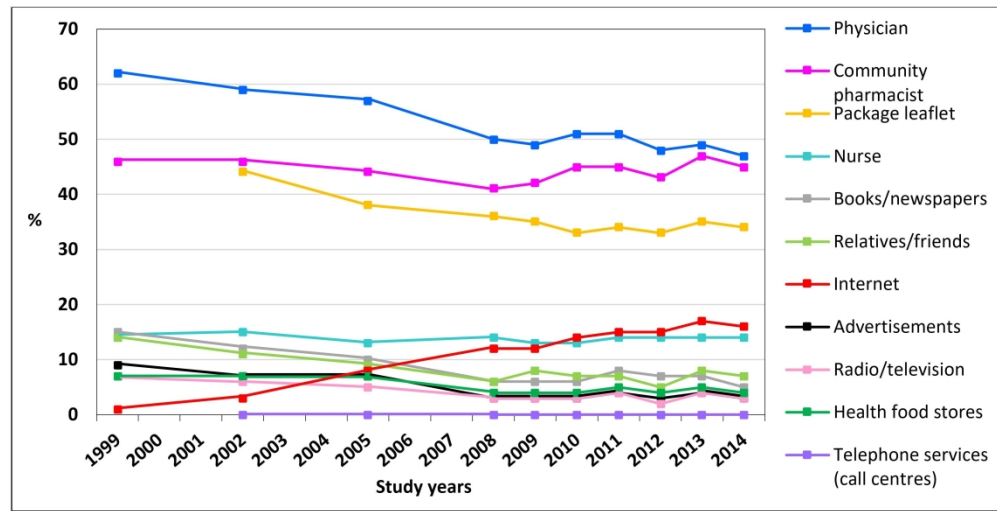

Figure 1 Trends in the receipt of medicines information among adult medicine users (n=18862) in 1999-2014 (% of the respondents who reported use of at least one prescription or non-prescription medicine within 7 days prior to the survey). The survey was not conducted in 2000, 2001, 2003, 2004, 2006 and 2007.



Figure 2 Number of medicines information sources from which the adult medicine users (n=18862) had received information on the medicines they used. The survey was not conducted in 2000, 2001, 2003, 2004, 2006 and 2007.



Figure 3 Ratio between mean number of medicines in use and mean number of diagnosed diseases compared to the mean number of medicines information sources from which the medicine users (n=18862) received medicines information. The survey was not conducted in 2000, 2001, 2003, 2004, 2006 and 2007.

**Appendix A.** Trends in the receipt of medicines information among medicine users by gender and age. The percentages are calculated from the variables within each subcategory (i.e. gender, age)<sup>a</sup>.

| Characteristics                                   | Study years <sup>b</sup> |               |               |               |               |               |               |               |               |               | P-value <sup>c</sup> |
|---------------------------------------------------|--------------------------|---------------|---------------|---------------|---------------|---------------|---------------|---------------|---------------|---------------|----------------------|
|                                                   | 1999<br>n (%)            | 2002<br>n (%) | 2005<br>n (%) | 2008<br>n (%) | 2009<br>n (%) | 2010<br>n (%) | 2011<br>n (%) | 2012<br>n (%) | 2013<br>n (%) | 2014<br>n (%) |                      |
| Respondents using medicines                       | 1944                     | 2000          | 2038          | 2101          | 1957          | 1871          | 1844          | 1759          | 1677          | 1671          |                      |
| <b>Gender</b>                                     |                          |               |               |               |               |               |               |               |               |               |                      |
| Female                                            | 1217 (63)                | 1278 (64)     | 1258 (62)     | 1332 (63)     | 1235 (63)     | 1181 (63)     | 1128 (61)     | 1101 (63)     | 1061 (63)     | 1068 (64)     |                      |
| Physician                                         | 798 (66)                 | 779 (61)      | 738 (59)      | 663 (50)      | 616 (50)      | 596 (50)      | 578 (51)      | 529 (48)      | 537 (51)      | 511 (48)      | <0.0001              |
| Community pharmacist                              | 617 (51)                 | 616 (48)      | 591 (47)      | 595 (45)      | 548 (44)      | 563 (48)      | 561 (50)      | 523 (48)      | 554 (52)      | 505 (47)      | <0.0001              |
| Package leaflet                                   | -                        | 615 (48)      | 539 (43)      | 527 (40)      | 494 (40)      | 462 (39)      | 439 (39)      | 411 (37)      | 437 (41)      | 408 (38)      | <0.0001              |
| Nurse                                             | 187 (15)                 | 183 (14)      | 159 (13)      | 195 (15)      | 173 (14)      | 157 (13)      | 158 (14)      | 168 (15)      | 155 (15)      | 152 (14)      | 0.278                |
| Books/newspapers                                  | 226 (19)                 | 198 (15)      | 162 (13)      | 95 (7)        | 92 (7)        | 83 (7)        | 109 (10)      | 74 (7)        | 85 (8)        | 77 (7)        | <0.0001              |
| Relatives/friends                                 | 160 (13)                 | 143 (11)      | 121 (10)      | 92 (7)        | 113 (9)       | 89 (8)        | 111 (10)      | 82 (7)        | 90 (8)        | 77 (7)        | <0.0001              |
| Internet                                          | 19 (2)                   | 47 (4)        | 99 (8)        | 178 (13)      | 178 (14)      | 189 (16)      | 195 (17)      | 192 (17)      | 212 (20)      | 191 (18)      | <0.0001              |
| Advertisements                                    | 123 (10)                 | 100 (8)       | 101 (8)       | 42 (3)        | 48 (4)        | 37 (3)        | 60 (5)        | 33 (3)        | 45 (4)        | 32 (3)        | <0.0001              |
| Radio/television                                  | 71 (6)                   | 80 (6)        | 69 (5)        | 35 (3)        | 38 (3)        | 42 (4)        | 62 (5)        | 34 (3)        | 38 (4)        | 27 (3)        | <0.0001              |
| Health food stores                                | 119 (10)                 | 121 (9)       | 108 (9)       | 67 (5)        | 69 (6)        | 64 (5)        | 73 (6)        | 57 (5)        | 68 (6)        | 57 (5)        | <0.0001              |
| Telephone services (call centres)                 | -                        | 4 (<1)        | 5 (<1)        | 4 (<1)        | 7 (<1)        | 1 (<1)        | 3 (<1)        | 3 (<1)        | 3 (<1)        | 4 (<1)        | 0.728                |
| MI received from at least one source <sup>d</sup> | 1185 (97)                | 1181 (92)     | 1125 (89)     | 1023 (77)     | 928 (75)      | 899 (76)      | 894 (79)      | 802 (73)      | 832 (78)      | 801 (75)      | <0.0001              |
| Male                                              | 727 (37)                 | 722 (36)      | 780 (38)      | 769 (37)      | 722 (37)      | 690 (37)      | 716 (39)      | 658 (37)      | 616 (37)      | 603 (36)      |                      |
| Physician                                         | 408 (56)                 | 407 (56)      | 415 (53)      | 387 (50)      | 334 (46)      | 357 (52)      | 355 (50)      | 310 (47)      | 279 (45)      | 274 (45)      | <0.0001              |
| Community pharmacist                              | 275 (37)                 | 296 (41)      | 310 (40)      | 266 (35)      | 264 (37)      | 279 (40)      | 264 (37)      | 237 (36)      | 239 (39)      | 254 (42)      | 0.005                |
| Package leaflet                                   | -                        | 261 (36)      | 243 (31)      | 218 (28)      | 191 (26)      | 158 (23)      | 179 (25)      | 161 (24)      | 143 (23)      | 158 (26)      | <0.0001              |
| Nurse                                             | 87 (12)                  | 124 (17)      | 95 (12)       | 102 (13)      | 84 (12)       | 86 (12)       | 100 (14)      | 79 (11)       | 77 (13)       | 76 (13)       | 0.001                |
| Books/newspapers                                  | 66 (9)                   | 49 (7)        | 41 (5)        | 30 (4)        | 20 (3)        | 21 (3)        | 28 (4)        | 20 (3)        | 26 (4)        | 14 (2)        | <0.0001              |
| Relatives/friends                                 | 109 (15)                 | 70 (10)       | 63 (8)        | 35 (5)        | 47 (7)        | 41 (6)        | 34 (5)        | 38 (6)        | 35 (6)        | 35 (6)        | <0.0001              |
| Internet                                          | 7 (1)                    | 21 (3)        | 58 (7)        | 65 (8)        | 65 (9)        | 72 (10)       | 81 (11)       | 75 (11)       | 71 (12)       | 71 (12)       | <0.0001              |
| Advertisements                                    | 57 (8)                   | 35 (5)        | 36 (5)        | 24 (3)        | 9 (1)         | 14 (2)        | 9 (1)         | 17 (3)        | 15 (2)        | 9 (1)         | <0.0001              |
| Radio/television                                  | 59 (8)                   | 47 (7)        | 32 (4)        | 20 (3)        | 12 (2)        | 15 (2)        | 19 (3)        | 9 (1)         | 22 (4)        | 16 (3)        | <0.0001              |
| Health food stores                                | 22 (3)                   | 20 (3)        | 28 (4)        | 21 (3)        | 10 (1)        | 13 (2)        | 17 (2)        | 9 (1)         | 9 (1)         | 9 (1)         | 0.013                |
| Telephone services (call centres)                 | -                        | 0 (0)         | 0 (0)         | 2 (<1)        | 0 (0)         | 0 (0)         | 1 (<1)        | 0 (0)         | 0 (0)         | 1 (<1)        | 1.000                |
| MI received from at least one source <sup>d</sup> | 683 (94)                 | 623 (86)      | 637 (82)      | 548 (71)      | 476 (66)      | 493 (71)      | 499 (70)      | 434 (66)      | 401 (65)      | 403 (67)      | <0.0001              |
| <b>Age group (years)</b>                          |                          |               |               |               |               |               |               |               |               |               |                      |
| 15-24                                             | 314 (16)                 | 308 (15)      | 269 (13)      | 270 (13)      | 263 (13)      | 255 (14)      | 231 (13)      | 211 (12)      | 199 (12)      | 215 (13)      |                      |
| Physician                                         | 157 (50)                 | 154 (50)      | 122 (45)      | 102 (38)      | 96 (37)       | 96 (38)       | 93 (40)       | 88 (42)       | 80 (40)       | 89 (41)       | <0.0001              |
| Community pharmacist                              | 132 (42)                 | 126 (41)      | 93 (35)       | 87 (32)       | 86 (33)       | 88 (35)       | 77 (33)       | 84 (40)       | 76 (38)       | 84 (39)       | 0.001                |
| Package leaflet                                   | -                        | 183 (59)      | 131 (49)      | 106 (39)      | 98 (38)       | 86 (35)       | 66 (29)       | 80 (38)       | 78 (39)       | 80 (37)       | <0.0001              |
| Nurse                                             | 65 (21)                  | 73 (24)       | 48 (18)       | 54 (20)       | 55 (21)       | 51 (20)       | 44 (19)       | 48 (23)       | 41 (21)       | 43 (20)       | 0.550                |
| Books/newspapers                                  | 41 (13)                  | 45 (15)       | 26 (10)       | 10 (4)        | 20 (8)        | 8 (3)         | 18 (8)        | 17 (8)        | 6 (3)         | 8 (4)         | <0.0001              |
| Relatives/friends                                 | 110 (35)                 | 76 (25)       | 60 (22)       | 48 (18)       | 52 (20)       | 40 (16)       | 50 (22)       | 40 (19)       | 29 (15)       | 35 (16)       | <0.0001              |
| Internet                                          | 7 (2)                    | 14 (5)        | 23 (9)        | 36 (13)       | 39 (15)       | 36 (14)       | 43 (19)       | 42 (20)       | 41 (21)       | 42 (20)       | <0.0001              |
| Advertisements                                    | 31 (10)                  | 26 (8)        | 30 (11)       | 9 (3)         | 12 (5)        | 9 (4)         | 8 (3)         | 7 (3)         | 5 (3)         | 6 (3)         | <0.0001              |
| Radio/television                                  | 30 (10)                  | 24 (8)        | 21 (8)        | 7 (3)         | 14 (5)        | 7 (3)         | 11 (5)        | 8 (4)         | 4 (2)         | 3 (1)         | <0.0001              |
| Health food stores                                | 11 (4)                   | 12 (4)        | 9 (3)         | 5 (2)         | 1 (<1)        | 4 (2)         | 5 (2)         | 7 (3)         | 7 (4)         | 5 (2)         | 0.277                |
| Telephone services (call centres)                 | -                        | 3 (1)         | 0 (0)         | 0 (0)         | 1 (<1)        | 0 (0)         | 0 (0)         | 0 (0)         | 1 (1)         | 1 (<1)        | 0.995                |
| MI received from at least one source <sup>d</sup> | 298 (95)                 | 271 (88)      | 223 (83)      | 185 (69)      | 169 (64)      | 166 (65)      | 158 (68)      | 136 (64)      | 127 (64)      | 146 (68)      | <0.0001              |

|                                                      |          |          |          |          |          |          |          |          |          |          |         |
|------------------------------------------------------|----------|----------|----------|----------|----------|----------|----------|----------|----------|----------|---------|
| 25-34                                                | 331 (17) | 308 (15) | 302 (15) | 305 (15) | 287 (15) | 258 (14) | 277 (15) | 251 (14) | 240 (14) | 239 (14) |         |
| 1 Physician                                          | 176 (53) | 152 (46) | 139 (46) | 144 (47) | 136 (48) | 119 (46) | 127 (46) | 108 (43) | 116 (48) | 88 (37)  | <0.0001 |
| 2 Community pharmacist                               | 183 (55) | 141 (43) | 137 (45) | 140 (46) | 122 (43) | 126 (49) | 136 (49) | 116 (46) | 115 (48) | 117 (49) | 0.011   |
| 3 Package leaflet                                    | -        | 160 (48) | 132 (44) | 129 (42) | 119 (42) | 100 (39) | 107 (39) | 101 (40) | 89 (37)  | 87 (36)  | <0.0001 |
| 4 Nurse                                              | 59 (17)  | 48 (15)  | 41 (14)  | 42 (14)  | 40 (14)  | 32 (12)  | 36 (13)  | 32 (13)  | 42 (18)  | 30 (13)  | 0.350   |
| 5 Books/newspapers                                   | 47 (14)  | 34 (10)  | 29 (10)  | 14 (5)   | 12 (4)   | 10 (4)   | 12 (4)   | 11 (4)   | 9 (4)    | 13 (5)   | <0.0001 |
| 6 Relatives/friends                                  | 57 (17)  | 38 (11)  | 51 (17)  | 23 (8)   | 28 (10)  | 25 (10)  | 38 (14)  | 17 (7)   | 33 (14)  | 19 (8)   | <0.0001 |
| 7 Internet                                           | 5 (2)    | 20 (6)   | 31 (10)  | 45 (15)  | 52 (18)  | 49 (19)  | 56 (20)  | 48 (19)  | 60 (25)  | 49 (21)  | <0.0001 |
| 8 Advertisements                                     | 31 (9)   | 29 (9)   | 28 (9)   | 8 (3)    | 8 (3)    | 9 (3)    | 7 (3)    | 6 (2)    | 6 (3)    | 5 (2)    | <0.0001 |
| 9 Radio/television                                   | 31 (9)   | 23 (7)   | 23 (8)   | 4 (1)    | 9 (3)    | 8 (3)    | 5 (2)    | 5 (2)    | 3 (1)    | 6 (3)    | <0.0001 |
| 10 Health food stores                                | 16 (5)   | 16 (5)   | 28 (9)   | 12 (4)   | 13 (5)   | 6 (2)    | 10 (4)   | 9 (4)    | 13 (5)   | 8 (3)    | 0.009   |
| 11 Telephone services (call centres)                 | -        | 0 (0)    | 3 (1)    | 1 (<1)   | 1 (<1)   | 0 (0)    | 1 (<1)   | 2 (1)    | 1 (<1)   | 4 (2)    | 0.795   |
| 12 MI received from at least one source <sup>d</sup> | 316 (95) | 273 (89) | 248 (82) | 220 (72) | 192 (67) | 184 (71) | 191 (69) | 167 (67) | 173 (72) | 161 (67) | <0.0001 |
| 13 35-44                                             | 419 (22) | 411 (21) | 394 (19) | 376 (19) | 335 (17) | 304 (16) | 318 (17) | 292 (17) | 275 (16) | 285 (17) |         |
| 14 Physician                                         | 220 (55) | 221 (54) | 200 (51) | 164 (44) | 146 (44) | 145 (48) | 145 (46) | 127 (43) | 121 (44) | 120 (42) | <0.0001 |
| 15 Community pharmacist                              | 230 (55) | 213 (52) | 183 (47) | 165 (44) | 132 (39) | 141 (47) | 130 (41) | 119 (41) | 134 (49) | 121 (43) | <0.0001 |
| 16 Package leaflet                                   | -        | 182 (44) | 181 (46) | 141 (38) | 122 (37) | 96 (32)  | 112 (35) | 105 (36) | 105 (38) | 86 (30)  | <0.0001 |
| 17 Nurse                                             | 40 (10)  | 46 (11)  | 41 (10)  | 46 (12)  | 44 (13)  | 29 (10)  | 34 (11)  | 37 (13)  | 26 (9)   | 37 (13)  | 0.861   |
| 18 Books/newspapers                                  | 77 (18)  | 57 (14)  | 33 (8)   | 24 (6)   | 16 (5)   | 12 (4)   | 19 (6)   | 10 (3)   | 14 (5)   | 12 (4)   | <0.0001 |
| 19 Relatives/friends                                 | 37 (9)   | 35 (9)   | 24 (6)   | 29 (8)   | 25 (7)   | 21 (7)   | 15 (5)   | 21 (7)   | 16 (6)   | 16 (6)   | 0.294   |
| 20 Internet                                          | 9 (2)    | 17 (4)   | 43 (11)  | 54 (14)  | 44 (13)  | 45 (15)  | 42 (13)  | 37 (13)  | 54 (20)  | 36 (13)  | <0.0001 |
| 21 Advertisements                                    | 61 (15)  | 33 (8)   | 26 (7)   | 18 (5)   | 6 (2)    | 7 (2)    | 9 (3)    | 7 (2)    | 7 (3)    | 14 (5)   | <0.0001 |
| 22 Radio/television                                  | 34 (8)   | 31 (8)   | 13 (3)   | 11 (3)   | 3 (1)    | 7 (2)    | 12 (4)   | 6 (2)    | 9 (3)    | 8 (3)    | <0.0001 |
| 23 Health food stores                                | 41 (10)  | 39 (9)   | 25 (6)   | 19 (5)   | 10 (3)   | 15 (5)   | 13 (4)   | 13 (4)   | 12 (4)   | 9 (3)    | <0.0001 |
| 24 Telephone services (call centres)                 | -        | 1 (<1)   | 0 (0)    | 3 (1)    | 2 (1)    | 0 (0)    | 2 (<1)   | 1 (<1)   | 0 (0)    | 0 (0)    | 0.992   |
| 25 MI received from at least one source <sup>d</sup> | 400 (95) | 366 (89) | 334 (85) | 270 (72) | 232 (69) | 210 (69) | 219 (69) | 195 (67) | 190 (69) | 188 (66) | <0.0001 |
| 26 45-54                                             | 481 (25) | 486 (24) | 491 (24) | 490 (23) | 460 (24) | 484 (26) | 438 (24) | 430 (24) | 411 (25) | 387 (23) |         |
| 27 Physician                                         | 342 (71) | 314 (65) | 297 (60) | 275 (56) | 232 (50) | 237 (49) | 229 (52) | 210 (49) | 200 (49) | 203 (52) | <0.0001 |
| 28 Community pharmacist                              | 210 (44) | 218 (45) | 227 (46) | 201 (41) | 203 (44) | 231 (48) | 216 (49) | 196 (46) | 196 (48) | 187 (48) | 0.240   |
| 29 Package leaflet                                   | -        | 185 (38) | 181 (37) | 176 (36) | 169 (37) | 163 (34) | 160 (37) | 136 (32) | 145 (35) | 138 (36) | 0.281   |
| 30 Nurse                                             | 59 (12)  | 65 (13)  | 53 (11)  | 72 (15)  | 47 (10)  | 46 (10)  | 59 (13)  | 48 (11)  | 53 (13)  | 42 (11)  | 0.212   |
| 31 Books/newspapers                                  | 81 (17)  | 60 (12)  | 57 (12)  | 40 (8)   | 32 (7)   | 32 (5)   | 38 (9)   | 20 (5)   | 33 (8)   | 17 (4)   | <0.0001 |
| 32 Relatives/friends                                 | 37 (8)   | 31 (6)   | 21 (4)   | 18 (4)   | 31 (7)   | 24 (5)   | 18 (4)   | 20 (5)   | 21 (5)   | 15 (4)   | 0.018   |
| 33 Internet                                          | 3 (1)    | 12 (2)   | 38 (8)   | 61 (12)  | 58 (13)  | 63 (13)  | 68 (16)  | 58 (13)  | 60 (15)  | 60 (16)  | <0.0001 |
| 34 Advertisements                                    | 32 (7)   | 31 (6)   | 30 (6)   | 17 (3)   | 16 (3)   | 15 (3)   | 20 (5)   | 14 (3)   | 18 (4)   | 6 (2)    | 0.004   |
| 35 Radio/television                                  | 22 (5)   | 26 (5)   | 15 (3)   | 17 (3)   | 13 (3)   | 10 (2)   | 17 (4)   | 10 (2)   | 20 (5)   | 6 (2)    | 0.019   |
| 36 Health food stores                                | 43 (9)   | 38 (8)   | 29 (6)   | 10 (2)   | 28 (6)   | 22 (5)   | 32 (7)   | 13 (3)   | 20 (5)   | 16 (4)   | 0.001   |
| 37 Telephone services (call centres)                 | -        | 0 (0)    | 0 (0)    | 1 (<1)   | 2 (<1)   | 1 (<1)   | 0 (0)    | 0 (0)    | 1 (<1)   | 0 (0)    | 1.000   |
| 38 MI received from at least one source <sup>d</sup> | 466 (97) | 446 (92) | 435 (89) | 383 (78) | 353 (77) | 364 (75) | 353 (81) | 305 (71) | 307 (75) | 287 (74) | <0.0001 |
| 39 55-64                                             | 399 (21) | 487 (24) | 582 (29) | 660 (31) | 612 (31) | 570 (30) | 580 (31) | 575 (33) | 552 (33) | 545 (33) |         |
| 40 Physician                                         | 311 (78) | 345 (71) | 395 (68) | 365 (55) | 340 (56) | 356 (62) | 339 (58) | 306 (53) | 299 (54) | 285 (52) | <0.0001 |
| 41 Community pharmacist                              | 137 (34) | 214 (44) | 261 (45) | 268 (41) | 269 (44) | 256 (45) | 266 (46) | 245 (43) | 272 (49) | 250 (46) | 0.025   |
| 42 Package leaflet                                   | -        | 166 (34) | 157 (27) | 193 (29) | 177 (29) | 172 (30) | 173 (30) | 150 (26) | 163 (30) | 175 (32) | 0.009   |
| 43 Nurse                                             | 51 (13)  | 75 (15)  | 71 (12)  | 83 (13)  | 71 (12)  | 85 (15)  | 85 (15)  | 82 (14)  | 70 (13)  | 76 (14)  | 0.128   |
| 44 Books/newspapers                                  | 46 (12)  | 51 (10)  | 58 (10)  | 37 (6)   | 32 (5)   | 42 (7)   | 50 (9)   | 36 (6)   | 49 (9)   | 41 (8)   | <0.0001 |
| 45 Relatives/friends                                 | 28 (7)   | 33 (7)   | 28 (5)   | 9 (1)    | 24 (4)   | 20 (4)   | 24 (4)   | 22 (4)   | 26 (5)   | 27 (5)   | <0.0001 |
| 46 Internet                                          | 2 (1)    | 5 (1)    | 22 (4)   | 47 (7)   | 50 (8)   | 68 (12)  | 67 (12)  | 82 (14)  | 68 (12)  | 75 (14)  | <0.0001 |
| 47 Advertisements                                    | 25 (6)   | 16 (3)   | 23 (4)   | 14 (7)   | 15 (2)   | 12 (2)   | 27 (5)   | 14 (2)   | 24 (4)   | 10 (2)   | 0.001   |
| 48 Radio/television                                  | 13 (3)   | 23 (5)   | 29 (5)   | 16 (2)   | 11 (2)   | 25 (4)   | 36 (6)   | 14 (2)   | 24 (4)   | 20 (4)   | 0.004   |
| 49 Health food stores                                | 30 (8)   | 36 (7)   | 45 (8)   | 42 (6)   | 27 (4)   | 30 (5)   | 42 (6)   | 24 (4)   | 25 (5)   | 28 (5)   | 0.027   |
| 50 Telephone services (call centres)                 | -        | 0 (0)    | 2 (<1)   | 1 (<1)   | 1 (1)    | 0 (0)    | 1 (<1)   | 0 (0)    | 0 (0)    | 0 (0)    | 1.000   |
| 51 MI received from at least one source <sup>d</sup> | 387 (97) | 448 (92) | 522 (90) | 513 (78) | 458 (75) | 468 (82) | 472 (81) | 433 (75) | 436 (79) | 422 (77) | <0.0001 |

<sup>a</sup>Discrepancies in totals are due to rounding errors, <sup>b</sup>Calculated from study years available, <sup>c</sup>Statistical significance for the change in the receipt of medicines information between the study years. Age, educational level, number of medicines in use and number of diagnosed diseases adjusted logistic regression was used in gender stratified analysis; and gender, educational level, number of medicines in use and number of diagnosed diseases adjusted logistic regression in age group stratified analysis,

<sup>d</sup>Medicines information (MI) sources listed in the survey.

**Appendix B.** Trends in the receipt of medicines information among medicine users by number of medicines in use and number of diagnosed diseases. The percentages are calculated from the variables within each subcategory (i.e. number of medicines in use, number of diagnosed diseases)<sup>a</sup>.

| Characteristics                                   | Study years <sup>b</sup> |               |               |               |               |               |               |               |               |               | P-value <sup>c</sup> |
|---------------------------------------------------|--------------------------|---------------|---------------|---------------|---------------|---------------|---------------|---------------|---------------|---------------|----------------------|
|                                                   | 1999<br>n (%)            | 2002<br>n (%) | 2005<br>n (%) | 2008<br>n (%) | 2009<br>n (%) | 2010<br>n (%) | 2011<br>n (%) | 2012<br>n (%) | 2013<br>n (%) | 2014<br>n (%) |                      |
| Respondents using medicines                       | 1944                     | 2000          | 2038          | 2101          | 1957          | 1871          | 1844          | 1759          | 1677          | 1671          |                      |
| Number of medicines in use/person                 |                          |               |               |               |               |               |               |               |               |               |                      |
| 1 medicine                                        | 1215 (63)                | 1183 (59)     | 1143 (56)     | 1154 (55)     | 1060 (54)     | 1029 (55)     | 1011 (55)     | 946 (54)      | 907 (54)      | 910 (54)      |                      |
| Physician                                         | 628 (52)                 | 559 (47)      | 508 (44)      | 465 (40)      | 410 (39)      | 414 (40)      | 410 (41)      | 344 (36)      | 366 (40)      | 345 (38)      | <0.0001              |
| Community pharmacist                              | 540 (44)                 | 461 (39)      | 408 (36)      | 405 (35)      | 369 (35)      | 386 (38)      | 375 (37)      | 333 (35)      | 368 (41)      | 347 (38)      | <0.0001              |
| Package leaflet                                   | -                        | 478 (40)      | 401 (35)      | 354 (31)      | 317 (30)      | 293 (28)      | 312 (31)      | 261 (28)      | 278 (31)      | 258 (28)      | <0.0001              |
| Nurse                                             | 138 (11)                 | 124 (10)      | 104 (9)       | 129 (11)      | 103 (10)      | 84 (8)        | 104 (10)      | 90 (10)       | 92 (10)       | 88 (10)       | 0.114                |
| Books/newspapers                                  | 184 (15)                 | 124 (10)      | 92 (8)        | 48 (4)        | 43 (4)        | 43 (4)        | 62 (6)        | 39 (4)        | 45 (5)        | 39 (4)        | <0.0001              |
| Relatives/friends                                 | 168 (14)                 | 113 (10)      | 94 (8)        | 70 (6)        | 76 (7)        | 64 (6)        | 78 (8)        | 55 (6)        | 56 (6)        | 48 (5)        | <0.0001              |
| Internet                                          | 10 (1)                   | 37 (3)        | 78 (7)        | 99 (9)        | 90 (8)        | 114 (11)      | 120 (12)      | 105 (11)      | 117 (13)      | 117 (13)      | <0.0001              |
| Advertisements                                    | 127 (10)                 | 86 (7)        | 74 (6)        | 38 (3)        | 28 (3)        | 29 (3)        | 36 (4)        | 26 (3)        | 27 (3)        | 26 (3)        | <0.0001              |
| Radio/television                                  | 88 (7)                   | 67 (6)        | 48 (4)        | 26 (2)        | 20 (2)        | 30 (3)        | 37 (4)        | 16 (2)        | 27 (3)        | 14 (2)        | <0.0001              |
| Health food stores                                | 77 (6)                   | 71 (6)        | 60 (5)        | 36 (3)        | 41 (4)        | 44 (4)        | 46 (5)        | 28 (3)        | 39 (4)        | 35 (4)        | <0.0001              |
| Telephone services (call centres)                 | -                        | 4 (<1)        | 2 (<1)        | 3 (<1)        | 3 (<1)        | 1 (<1)        | 2 (<1)        | 2 (<1)        | 0 (0)         | 3 (<1)        | 0.985                |
| MI received from at least one source <sup>d</sup> | 1147 (94)                | 1019 (86)     | 924 (81)      | 768 (67)      | 681 (64)      | 691 (67)      | 689 (68)      | 583 (62)      | 615 (68)      | 590 (65)      | <0.0001              |
| 2 medicines                                       | 505 (26)                 | 559 (28)      | 566 (28)      | 584 (28)      | 536 (27)      | 512 (27)      | 491 (27)      | 492 (28)      | 442 (26)      | 429 (26)      |                      |
| Physician                                         | 386 (76)                 | 396 (71)      | 371 (66)      | 336 (58)      | 297 (55)      | 299 (58)      | 278 (57)      | 284 (58)      | 236 (53)      | 224 (52)      | <0.0001              |
| Community pharmacist                              | 237 (47)                 | 299 (53)      | 290 (51)      | 256 (44)      | 235 (44)      | 247 (48)      | 245 (50)      | 238 (48)      | 224 (51)      | 211 (49)      | 0.012                |
| Package leaflet                                   | -                        | 270 (48)      | 225 (40)      | 231 (40)      | 205 (38)      | 189 (37)      | 168 (34)      | 172 (35)      | 158 (36)      | 151 (35)      | <0.0001              |
| Nurse                                             | 94 (19)                  | 117 (21)      | 84 (15)       | 90 (15)       | 72 (13)       | 68 (13)       | 72 (15)       | 76 (15)       | 59 (13)       | 62 (14)       | 0.002                |
| Books/newspapers                                  | 73 (14)                  | 83 (15)       | 62 (11)       | 39 (7)        | 38 (7)        | 31 (6)        | 35 (7)        | 30 (6)        | 45 (5)        | 32 (7)        | <0.0001              |
| Relatives/friends                                 | 75 (15)                  | 66 (12)       | 62 (11)       | 38 (7)        | 54 (10)       | 45 (9)        | 42 (9)        | 39 (8)        | 38 (9)        | 29 (7)        | <0.0001              |
| Internet                                          | 7 (1)                    | 25 (4)        | 46 (8)        | 85 (15)       | 81 (15)       | 81 (16)       | 83 (17)       | 90 (18)       | 90 (20)       | 83 (19)       | <0.0001              |
| Advertisements                                    | 40 (8)                   | 34 (6)        | 43 (8)        | 17 (3)        | 17 (3)        | 14 (3)        | 16 (3)        | 14 (3)        | 19 (4)        | 10 (2)        | <0.0001              |
| Radio/television                                  | 23 (5)                   | 37 (7)        | 28 (5)        | 16 (3)        | 17 (3)        | 16 (3)        | 21 (4)        | 16 (3)        | 16 (4)        | 11 (3)        | 0.029                |
| Health food stores                                | 38 (8)                   | 48 (9)        | 51 (9)        | 31 (5)        | 18 (3)        | 22 (4)        | 27 (5)        | 23 (5)        | 22 (5)        | 17 (4)        | 0.001                |
| Telephone services (call centres)                 | -                        | 0 (0)         | 1 (<1)        | 2 (<1)        | 2 (<1)        | 0 (0)         | 1 (<1)        | 1 (<1)        | 2 (<1)        | 1 (<1)        | 0.954                |
| MI received from at least one source <sup>d</sup> | 500 (99)                 | 534 (96)      | 519 (92)      | 479 (82)      | 414 (77)      | 411 (80)      | 408 (83)      | 381 (77)      | 343 (78)      | 326 (76)      | <0.0001              |
| 3 medicines                                       | 161 (8)                  | 166 (8)       | 198 (10)      | 221 (11)      | 220 (11)      | 210 (11)      | 210 (11)      | 191 (11)      | 208 (12)      | 199 (12)      |                      |
| Physician                                         | 133 (83)                 | 139 (84)      | 158 (80)      | 147 (67)      | 140 (64)      | 149 (71)      | 150 (71)      | 116 (61)      | 134 (64)      | 122 (61)      | <0.0001              |
| Community pharmacist                              | 76 (47)                  | 94 (57)       | 112 (57)      | 111 (50)      | 118 (54)      | 130 (62)      | 110 (52)      | 106 (55)      | 127 (61)      | 117 (59)      | 0.302                |
| Package leaflet                                   | -                        | 83 (50)       | 88 (44)       | 97 (44)       | 90 (41)       | 87 (41)       | 80 (38)       | 77 (40)       | 100 (48)      | 95 (48)       | 0.152                |
| Nurse                                             | 28 (17)                  | 41 (25)       | 33 (17)       | 37 (17)       | 45 (20)       | 57 (27)       | 44 (21)       | 40 (21)       | 42 (20)       | 46 (23)       | 0.268                |
| Books/newspapers                                  | 25 (16)                  | 22 (13)       | 24 (12)       | 20 (9)        | 13 (6)        | 20 (10)       | 21 (10)       | 17 (9)        | 23 (11)       | 12 (6)        | 0.025                |
| Relatives/friends                                 | 14 (9)                   | 26 (16)       | 15 (8)        | 10 (5)        | 10 (5)        | 16 (8)        | 14 (7)        | 20 (10)       | 19 (9)        | 21 (11)       | 0.010                |
| Internet                                          | 6 (4)                    | 4 (2)         | 23 (12)       | 37 (17)       | 37 (17)       | 42 (20)       | 44 (21)       | 38 (20)       | 47 (23)       | 33 (17)       | <0.0001              |
| Advertisements                                    | 8 (5)                    | 13 (8)        | 12 (6)        | 5 (2)         | 5 (2)         | 6 (3)         | 11 (5)        | 6 (3)         | 3 (2)         | 9 (4)         | 0.094                |
| Radio/television                                  | 13 (8)                   | 17 (10)       | 9 (5)         | 5 (2)         | 5 (2)         | 9 (4)         | 13 (6)        | 5 (3)         | 11 (5)        | 6 (3)         | 0.003                |
| Health food stores                                | 19 (12)                  | 11 (7)        | 12 (6)        | 8 (4)         | 12 (5)        | 7 (3)         | 8 (4)         | 7 (4)         | 10 (5)        | 9 (5)         | 0.099                |
| Telephone services (call centres)                 | -                        | 0 (0)         | 1 (1)         | 1 (<1)        | 0 (0)         | 0 (0)         | 1 (<1)        | 0 (0)         | 1 (<1)        | 0 (0)         | 1.000                |
| MI received from at least one source <sup>d</sup> | 157 (98)                 | 162 (98)      | 189 (95)      | 193 (87)      | 181 (82)      | 184 (88)      | 177 (84)      | 157 (82)      | 172 (83)      | 174 (87)      | <0.0001              |
| 4 medicines or more                               | 63 (3)                   | 92 (5)        | 131 (6)       | 142 (7)       | 141 (7)       | 120 (6)       | 132 (7)       | 130 (7)       | 120 (7)       | 133 (8)       |                      |
| Physician                                         | 59 (94)                  | 78 (85)       | 116 (89)      | 102 (72)      | 103 (73)      | 91 (76)       | 95 (72)       | 95 (72)       | 80 (67)       | 94 (71)       | <0.0001              |
| Community pharmacist                              | 39 (62)                  | 58 (63)       | 91 (69)       | 89 (63)       | 90 (64)       | 79 (66)       | 95 (72)       | 83 (63)       | 74 (62)       | 84 (63)       | 0.842                |
| Package leaflet                                   | -                        | 45 (39)       | 68 (52)       | 63 (44)       | 73 (52)       | 51 (43)       | 58 (44)       | 62 (48)       | 44 (37)       | 62 (47)       | 0.397                |
| Nurse                                             | 14 (22)                  | 25 (27)       | 33 (25)       | 41 (29)       | 37 (26)       | 34 (28)       | 38 (29)       | 41 (32)       | 39 (33)       | 32 (24)       | 0.737                |
| Books/newspapers                                  | 10 (16)                  | 18 (20)       | 25 (19)       | 18 (13)       | 18 (13)       | 10 (8)        | 19 (14)       | 8 (6)         | 14 (12)       | 8 (6)         | 0.031                |
| Relatives/friends                                 | 12 (19)                  | 8 (9)         | 13 (10)       | 9 (6)         | 20 (14)       | 5 (4)         | 11 (8)        | 6 (5)         | 12 (10)       | 14 (11)       | 0.097                |
| Internet                                          | 3 (5)                    | 2 (2)         | 10 (8)        | 22 (15)       | 35 (25)       | 24 (20)       | 29 (22)       | 34 (26)       | 29 (24)       | 29 (22)       | <0.0001              |
| Advertisements                                    | 5 (8)                    | 2 (2)         | 8 (6)         | 6 (4)         | 7 (5)         | 2 (2)         | 4 (3)         | 5 (4)         | 2 (2)         | 5 (4)         | 0.357                |
| Radio/television                                  | 6 (10)                   | 6 (7)         | 16 (12)       | 8 (6)         | 8 (6)         | 2 (2)         | 10 (8)        | 6 (5)         | 6 (5)         | 12 (9)        | 0.218                |
| Health food stores                                | 7 (11)                   | 11 (12)       | 13 (10)       | 13 (9)        | 8 (6)         | 4 (3)         | 9 (7)         | 8 (6)         | 6 (5)         | 5 (4)         | 0.125                |

|    |                                                   |           |           |          |          |          |          |          |          |           |          |         |
|----|---------------------------------------------------|-----------|-----------|----------|----------|----------|----------|----------|----------|-----------|----------|---------|
| 1  | Telephone services (call centres)                 | -         | 0 (0)     | 1 (1)    | 0 (0)    | 2 (1)    | 0 (0)    | 0 (0)    | 0 (0)    | 0 (0)     | 1 (1)    | 1.000   |
| 2  | MI received from at least one source <sup>d</sup> | 63 (100)  | 89 (97)   | 130 (99) | 131 (92) | 128 (91) | 106 (88) | 119 (90) | 115 (88) | 103 (86)  | 114 (86) | 0.074   |
| 3  | Number of diagnosed diseases/person <sup>e</sup>  |           |           |          |          |          |          |          |          |           |          |         |
| 4  | None                                              | 1228 (63) | 1121 (56) | 971 (48) | 850 (40) | 772 (39) | 796 (43) | 746 (40) | 705 (40) | 721 (42)  | 689 (41) |         |
| 5  | Physician                                         | 633 (52)  | 536 (48)  | 384 (40) | 281 (33) | 266 (34) | 295 (37) | 268 (36) | 247 (35) | 264 (37)  | 217 (31) | <0.0001 |
| 6  | Community pharmacist                              | 558 (45)  | 470 (42)  | 371 (38) | 294 (35) | 252 (33) | 289 (36) | 264 (35) | 247 (35) | 272 (38)  | 236 (34) | <0.0001 |
| 7  | Package leaflet                                   | -         | 496 (44)  | 387 (40) | 275 (32) | 246 (32) | 239 (30) | 233 (31) | 199 (28) | 226 (32)  | 207 (30) | <0.0001 |
| 8  | Nurse                                             | 157 (13)  | 146 (13)  | 91 (9)   | 87 (10)  | 64 (8)   | 76 (10)  | 69 (9)   | 69 (10)  | 72 (10)   | 64 (9)   | 0.030   |
| 9  | Books/newspapers                                  | 194 (16)  | 134 (12)  | 95 (10)  | 41 (5)   | 34 (4)   | 39 (5)   | 49 (7)   | 34 (5)   | 38 (5)    | 37 (5)   | <0.0001 |
| 10 | Relatives/friends                                 | 196 (16)  | 135 (12)  | 117 (12) | 54 (6)   | 65 (8)   | 63 (8)   | 69 (9)   | 54 (8)   | 49 (7)    | 40 (6)   | <0.0001 |
| 11 | Internet                                          | 15 (1)    | 38 (3)    | 65 (7)   | 75 (9)   | 70 (9)   | 95 (12)  | 92 (12)  | 83 (12)  | 108 (15)  | 93 (13)  | <0.0001 |
| 12 | Advertisements                                    | 141 (12)  | 88 (8)    | 81 (8)   | 34 (4)   | 20 (3)   | 25 (3)   | 29 (4)   | 19 (3)   | 24 (3)    | 24 (3)   | <0.0001 |
| 13 | Radio/television                                  | 96 (8)    | 65 (6)    | 52 (5)   | 19 (2)   | 17 (2)   | 21 (3)   | 31 (4)   | 12 (2)   | 23 (3)    | 18 (3)   | <0.0001 |
| 14 | Health food stores                                | 85 (7)    | 84 (8)    | 72 (7)   | 37 (4)   | 22 (3)   | 33 (4)   | 30 (4)   | 17 (2)   | 35 (5)    | 29 (4)   | <0.0001 |
| 15 | Telephone services (call centres)                 | -         | 3 (<1)    | 4 (<1)   | 2 (<1)   | 2 (<1)   | 0 (0)    | 2 (<1)   | 2 (<1)   | 2 (<1)    | 3 (<1)   | 0.963   |
| 16 | MI received from at least one source <sup>d</sup> | 1163 (95) | 966 (86)  | 784 (81) | 543 (64) | 481 (62) | 528 (66) | 493 (66) | 424 (60) | 466 (65)  | 425 (62) | <0.0001 |
| 17 | 1 disease                                         | 502 (26)  | 527 (26)  | 593 (29) | 605 (29) | 546 (28) | 482 (26) | 517 (28) | 499 (28) | 455 (27)  | 450 (27) |         |
| 18 | Physician                                         | 389 (77)  | 364 (69)  | 394 (66) | 337 (40) | 282 (52) | 252 (52) | 265 (51) | 240 (48) | 237 (52)  | 237 (53) | <0.0001 |
| 19 | Community pharmacist                              | 224 (45)  | 259 (49)  | 260 (44) | 235 (39) | 223 (41) | 213 (44) | 234 (45) | 207 (41) | 221 (49)  | 212 (47) | 0.020   |
| 20 | Package leaflet                                   | -         | 228 (43)  | 202 (34) | 206 (34) | 188 (34) | 154 (32) | 160 (31) | 147 (29) | 163 (36)  | 139 (31) | <0.0001 |
| 21 | Nurse                                             | 70 (14)   | 81 (15)   | 68 (12)  | 87 (14)  | 81 (15)  | 54 (11)  | 67 (13)  | 63 (13)  | 56 (12)   | 59 (13)  | 0.558   |
| 22 | Books/newspapers                                  | 75 (15)   | 66 (13)   | 54 (9)   | 36 (6)   | 33 (6)   | 23 (5)   | 38 (7)   | 24 (5)   | 31 (7)    | 19 (4)   | <0.0001 |
| 23 | Relatives/friends                                 | 53 (11)   | 56 (11)   | 32 (5)   | 36 (6)   | 40 (7)   | 39 (8)   | 36 (7)   | 26 (5)   | 30 (7)    | 24 (5)   | <0.0001 |
| 24 | Internet                                          | 8 (2)     | 19 (4)    | 49 (8)   | 76 (13)  | 66 (12)  | 67 (14)  | 63 (12)  | 68 (14)  | 89 (20)   | 66 (15)  | <0.0001 |
| 25 | Advertisements                                    | 32 (6)    | 30 (6)    | 35 (6)   | 11 (2)   | 16 (3)   | 12 (2)   | 16 (3)   | 12 (2)   | 19 (4)    | 11 (2)   | <0.0001 |
| 26 | Radio/television                                  | 22 (4)    | 42 (8)    | 24 (4)   | 13 (2)   | 10 (2)   | 15 (3)   | 17 (3)   | 15 (3)   | 18 (4)    | 7 (2)    | <0.0001 |
| 27 | Health food stores                                | 44 (9)    | 36 (7)    | 30 (5)   | 16 (3)   | 25 (5)   | 18 (4)   | 26 (5)   | 23 (5)   | 19 (4)    | 19 (4)   | 0.005   |
| 28 | Telephone services (call centres)                 | -         | 0 (0)     | 0 (0)    | 2 (<1)   | 2 (<1)   | 1 (<1)   | 0 (0)    | 1 (<1)   | 1 (<1)    | 1 (<1)   | 1.000   |
| 29 | MI received from at least one source <sup>d</sup> | 491 (98)  | 501 (95)  | 528 (89) | 467 (77) | 392 (72) | 360 (75) | 405 (78) | 351 (70) | 342 (75)  | 338 (75) | <0.0001 |
| 30 | 2 diseases                                        | 151 (8)   | 232 (12)  | 270 (13) | 367 (17) | 358 (22) | 335 (18) | 345 (19) | 302 (17) | 279 (17)  | 285 (17) |         |
| 31 | Physician                                         | 126 (83)  | 183 (79)  | 203 (75) | 240 (65) | 214 (60) | 221 (66) | 229 (66) | 185 (61) | 160 (57)  | 163 (57) | <0.0001 |
| 32 | Community pharmacist                              | 79 (52)   | 116 (50)  | 140 (52) | 180 (49) | 181 (51) | 176 (53) | 177 (51) | 155 (51) | 152 (54)  | 156 (55) | 0.941   |
| 33 | Package leaflet                                   | -         | 98 (42)   | 98 (36)  | 137 (37) | 135 (38) | 116 (35) | 125 (36) | 116 (38) | 99 (35)   | 108 (38) | 0.370   |
| 34 | Nurse                                             | 34 (23)   | 43 (19)   | 39 (14)  | 52 (14)  | 55 (15)  | 50 (15)  | 59 (17)  | 51 (17)  | 53 (19)   | 36 (13)  | 0.276   |
| 35 | Books/newspapers                                  | 11 (7)    | 28 (12)   | 24 (9)   | 23 (6)   | 25 (7)   | 21 (6)   | 27 (8)   | 20 (7)   | 21 (8)    | 17 (6)   | 0.045   |
| 36 | Relatives/friends                                 | 11 (7)    | 18 (8)    | 18 (7)   | 22 (6)   | 31 (9)   | 10 (3)   | 22 (6)   | 20 (6)   | 29 (10)   | 29 (10)  | 0.044   |
| 37 | Internet                                          | 1 (1)     | 9 (4)     | 28 (10)  | 56 (15)  | 56 (16)  | 45 (13)  | 65 (19)  | 60 (20)  | 44 (16)   | 47 (16)  | <0.0001 |
| 38 | Advertisements                                    | 3 (2)     | 12 (5)    | 10 (4)   | 8 (2)    | 10 (3)   | 7 (2)    | 13 (4)   | 12 (4)   | 10 (4)    | 4 (1)    | 0.229   |
| 39 | Radio/television                                  | 7 (5)     | 11 (5)    | 7 (3)    | 8 (2)    | 11 (3)   | 9 (3)    | 19 (6)   | 12 (4)   | 11 (4)    | 7 (2)    | 0.293   |
| 40 | Health food stores                                | 5 (3)     | 15 (7)    | 15 (6)   | 20 (5)   | 24 (7)   | 13 (4)   | 23 (7)   | 15 (5)   | 11 (4)    | 8 (3)    | 0.208   |
| 41 | Telephone services (call centres)                 | -         | 1 (<1)    | 0 (0)    | 0 (0)    | 0 (0)    | 0 (0)    | 2 (1)    | 0 (0)    | 0 (0)     | 0 (0)    | 1.000   |
| 42 | MI received from at least one source <sup>d</sup> | 150 (99)  | 222 (96)  | 251 (93) | 311 (85) | 287 (80) | 277 (83) | 290 (84) | 250 (83) | 224 (80)  | 227 (80) | <0.0001 |
| 43 | 3 diseases or more                                | 63 (5)    | 120 (6)   | 204 (10) | 279 (13) | 281 (14) | 258 (14) | 236 (13) | 253 (14) | 231 (14)  | 247 (15) |         |
| 44 | Physician                                         | 58 (92)   | 103 (86)  | 172 (84) | 192 (69) | 188 (67) | 185 (71) | 171 (72) | 167 (66) | 155 (67)  | 168 (68) | <0.0001 |
| 45 | Community pharmacist                              | 31 (49)   | 67 (56)   | 130 (64) | 152 (54) | 156 (56) | 164 (64) | 150 (64) | 151 (60) | 148 (64)  | 155 (63) | 0.229   |
| 46 | Package leaflet                                   | -         | 54 (45)   | 95 (47)  | 127 (46) | 116 (41) | 111 (43) | 100 (42) | 110 (43) | 92 (40)   | 112 (45) | 0.738   |
| 47 | Nurse                                             | 13 (21)   | 37 (31)   | 56 (28)  | 71 (25)  | 57 (20)  | 63 (24)  | 63 (27)  | 64 (25)  | 51 (22)   | 69 (28)  | 0.440   |
| 48 | Books/newspapers                                  | 12 (19)   | 19 (16)   | 30 (155) | 28 (10)  | 20 (7)   | 21 (8)   | 23 (10)  | 16 (6)   | 21 (9)    | 18 (7)   | 0.003   |
| 49 | Relatives/friends                                 | 9 (14)    | 4 (3)     | 17 (8)   | 15 (5)   | 24 (9)   | 18 (7)   | 18 (8)   | 20 (8)   | 17 (7)    | 19 (8)   | 0.307   |
| 50 | Internet                                          | 2 (3)     | 2 (2)     | 15 (7)   | 36 (13)  | 51 (18)  | 54 (21)  | 56 (24)  | 56 (22)  | 42 (18)   | 56 (23)  | <0.0001 |
| 51 | Advertisements                                    | 4 (6)     | 5 (4)     | 11 (5)   | 13 (5)   | 11 (4)   | 7 (3)    | 11 (5)   | 7 (3)    | 7 (3)     | 2 (1)    | 0.263   |
| 52 | Radio/television                                  | 5 (8)     | 9 (8)     | 18 (9)   | 15 (5)   | 12 (4)   | 12 (5)   | 14 (6)   | 4 (2)    | 7 (3)     | 11 (4)   | 0.190   |
| 53 | Health food stores                                | 7 (11)    | 6 (5)     | 19 (9)   | 15 (5)   | 8 (3)    | 13 (5)   | 11 (5)   | 11 (4)   | 12 (5)    | 10 (4)   | 0.111   |
| 54 | Telephone services (call centres)                 | -         | 0 (0)     | 1 (1)    | 2 (1)    | 3 (1)    | 0 (0)    | 0 (0)    | 0 (0)    | 0 (0)     | 1 (<1)   | 0.998   |
| 55 | MI received from at least one source <sup>d</sup> | 63 (100)  | 115 (96)  | 199 (98) | 250 (90) | 244 (87) | 227 (88) | 205 (87) | 211 (83) | 201 (231) | 214 (87) | 0.001   |

<sup>a</sup>Discrepancies in totals are due to rounding errors, <sup>b</sup>Calculated from study years available, <sup>c</sup>Statistical significance for the change in the receipt of medicines information between the study years. Age, gender, educational level, number of medicines in use and number of diagnosed diseases adjusted logistic regression was used in number of medicines in use and number of diagnosed diseases stratified analysis, <sup>d</sup>Medicines information (MI) sources listed in the survey, <sup>e</sup>Respondents who had diseases (list in the survey) diagnosed by a physician during the last year (12 months). For peer review only - <http://bmjopen.bmj.com/site/about/guidelines.xhtml>



STROBE Statement—Checklist of items that should be included in reports of *cross-sectional studies*

|                              | Item No | Recommendation                                                                                                                                                                                    | Page No |
|------------------------------|---------|---------------------------------------------------------------------------------------------------------------------------------------------------------------------------------------------------|---------|
| <b>Title and abstract</b>    | 1       | (a) Indicate the study's design with a commonly used term in the title or the abstract                                                                                                            | 1       |
|                              |         | (b) Provide in the abstract an informative and balanced summary of what was done and what was found                                                                                               | 2       |
| <b>Introduction</b>          |         |                                                                                                                                                                                                   |         |
| Background/rationale         | 2       | Explain the scientific background and rationale for the investigation being reported                                                                                                              | 4       |
| Objectives                   | 3       | State specific objectives, including any prespecified hypotheses                                                                                                                                  | 4       |
| <b>Methods</b>               |         |                                                                                                                                                                                                   |         |
| Study design                 | 4       | Present key elements of study design early in the paper                                                                                                                                           | 5,6     |
| Setting                      | 5       | Describe the setting, locations, and relevant dates, including periods of recruitment, exposure, follow-up, and data collection                                                                   | 5-7     |
| Participants                 | 6       | (a) Give the eligibility criteria, and the sources and methods of selection of participants                                                                                                       | 5,6     |
| Variables                    | 7       | Clearly define all outcomes, exposures, predictors, potential confounders, and effect modifiers. Give diagnostic criteria, if applicable                                                          | 6,7     |
| Data sources/<br>measurement | 8*      | For each variable of interest, give sources of data and details of methods of assessment (measurement). Describe comparability of assessment methods if there is more than one group              | 6       |
| Bias                         | 9       | Describe any efforts to address potential sources of bias                                                                                                                                         | 14      |
| Study size                   | 10      | Explain how the study size was arrived at                                                                                                                                                         | 8       |
| Quantitative variables       | 11      | Explain how quantitative variables were handled in the analyses. If applicable, describe which groupings were chosen and why                                                                      | 6,7     |
| Statistical methods          | 12      | (a) Describe all statistical methods, including those used to control for confounding                                                                                                             | 6,7     |
|                              |         | (b) Describe any methods used to examine subgroups and interactions                                                                                                                               | 6,7     |
|                              |         | (c) Explain how missing data were addressed                                                                                                                                                       | 6       |
|                              |         | (d) If applicable, describe analytical methods taking account of sampling strategy                                                                                                                | NA      |
|                              |         | (e) Describe any sensitivity analyses                                                                                                                                                             | NA      |
| <b>Results</b>               |         |                                                                                                                                                                                                   |         |
| Participants                 | 13*     | (a) Report numbers of individuals at each stage of study—eg numbers potentially eligible, examined for eligibility, confirmed eligible, included in the study, completing follow-up, and analysed | 8       |
|                              |         | (b) Give reasons for non-participation at each stage                                                                                                                                              | 6,8     |
|                              |         | (c) Consider use of a flow diagram                                                                                                                                                                | NA      |
| Descriptive data             | 14*     | (a) Give characteristics of study participants (eg demographic, clinical, social) and information on exposures and potential confounders                                                          | 8-10    |
|                              |         | (b) Indicate number of participants with missing data for each variable of interest                                                                                                               | 9-10    |
| Outcome data                 | 15*     | Report numbers of outcome events or summary measures                                                                                                                                              | 11,12   |
| Main results                 | 16      | (a) Give unadjusted estimates and, if applicable, confounder-adjusted                                                                                                                             | NA      |

|                          |    |                                                                                                                                                                            |                  |
|--------------------------|----|----------------------------------------------------------------------------------------------------------------------------------------------------------------------------|------------------|
|                          |    | estimates and their precision (eg, 95% confidence interval). Make clear which confounders were adjusted for and why they were included                                     |                  |
|                          |    | (b) Report category boundaries when continuous variables were categorized                                                                                                  | NA               |
|                          |    | (c) If relevant, consider translating estimates of relative risk into absolute risk for a meaningful time period                                                           | NA               |
| Other analyses           | 17 | Report other analyses done—eg analyses of subgroups and interactions, and sensitivity analyses                                                                             | 12, Appendix 1&2 |
| <b>Discussion</b>        |    |                                                                                                                                                                            |                  |
| Key results              | 18 | Summarise key results with reference to study objectives                                                                                                                   | 14,15            |
| Limitations              | 19 | Discuss limitations of the study, taking into account sources of potential bias or imprecision. Discuss both direction and magnitude of any potential bias                 | 15,16            |
| Interpretation           | 20 | Give a cautious overall interpretation of results considering objectives, limitations, multiplicity of analyses, results from similar studies, and other relevant evidence | 14-16            |
| Generalisability         | 21 | Discuss the generalisability (external validity) of the study results                                                                                                      | 15               |
| <b>Other information</b> |    |                                                                                                                                                                            |                  |
| Funding                  | 22 | Give the source of funding and the role of the funders for the present study and, if applicable, for the original study on which the present article is based              | 17               |

\*Give information separately for exposed and unexposed groups.

**Note:** An Explanation and Elaboration article discusses each checklist item and gives methodological background and published examples of transparent reporting. The STROBE checklist is best used in conjunction with this article (freely available on the Web sites of PLoS Medicine at <http://www.plosmedicine.org/>, Annals of Internal Medicine at <http://www.annals.org/>, and Epidemiology at <http://www.epidem.com/>). Information on the STROBE Initiative is available at [www.strobe-statement.org](http://www.strobe-statement.org).
