# Supplementary material for: Trends in the receipt of medicines information among Finnish adults in 1999–2014: a nationwide repeated cross-sectional survey
Source: PubMed Central journal article supplement — BMJ Open. 2019 Jun 14;9(6):e026377. doi: 10.1136/bmjopen-2018-026377 (PMC6588993; doi:10.1136/bmjopen-2018-026377), 2019-06-14
Supplement: bmjopen-2018-026377supp001.pdf [file bmjopen-2018-026377supp001.pdf]

**Appendix A.** Trends in the receipt of medicines information among medicine users by gender and age. The percentages are calculated from the variables within each subcategory (i.e. gender, age)<sup>a</sup>.

| Characteristics                                   | Study years <sup>b</sup> |               |               |               |               |               |               |               |               |               | P-value <sup>c</sup> |
|---------------------------------------------------|--------------------------|---------------|---------------|---------------|---------------|---------------|---------------|---------------|---------------|---------------|----------------------|
|                                                   | 1999<br>n (%)            | 2002<br>n (%) | 2005<br>n (%) | 2008<br>n (%) | 2009<br>n (%) | 2010<br>n (%) | 2011<br>n (%) | 2012<br>n (%) | 2013<br>n (%) | 2014<br>n (%) |                      |
| Respondents using medicines                       | 1944                     | 2000          | 2038          | 2101          | 1957          | 1871          | 1844          | 1759          | 1677          | 1671          |                      |
| <b>Gender</b>                                     |                          |               |               |               |               |               |               |               |               |               |                      |
| Female                                            | 1217 (63)                | 1278 (64)     | 1258 (62)     | 1332 (63)     | 1235 (63)     | 1181 (63)     | 1128 (61)     | 1101 (63)     | 1061 (63)     | 1068 (64)     |                      |
| Physician                                         | 798 (66)                 | 779 (61)      | 738 (59)      | 663 (50)      | 616 (50)      | 596 (50)      | 578 (51)      | 529 (48)      | 537 (51)      | 511 (48)      | <0.0001              |
| Community pharmacist                              | 617 (51)                 | 616 (48)      | 591 (47)      | 595 (45)      | 548 (44)      | 563 (48)      | 561 (50)      | 523 (48)      | 554 (52)      | 505 (47)      | <0.0001              |
| Package leaflet                                   | -                        | 615 (48)      | 539 (43)      | 527 (40)      | 494 (40)      | 462 (39)      | 439 (39)      | 411 (37)      | 437 (41)      | 408 (38)      | <0.0001              |
| Nurse                                             | 187 (15)                 | 183 (14)      | 159 (13)      | 195 (15)      | 173 (14)      | 157 (13)      | 158 (14)      | 168 (15)      | 155 (15)      | 152 (14)      | 0.278                |
| Books/newspapers                                  | 226 (19)                 | 198 (15)      | 162 (13)      | 95 (7)        | 92 (7)        | 83 (7)        | 109 (10)      | 74 (7)        | 85 (8)        | 77 (7)        | <0.0001              |
| Relatives/friends                                 | 160 (13)                 | 143 (11)      | 121 (10)      | 92 (7)        | 113 (9)       | 89 (8)        | 111 (10)      | 82 (7)        | 90 (8)        | 77 (7)        | <0.0001              |
| Internet                                          | 19 (2)                   | 47 (4)        | 99 (8)        | 178 (13)      | 178 (14)      | 189 (16)      | 195 (17)      | 192 (17)      | 212 (20)      | 191 (18)      | <0.0001              |
| Advertisements                                    | 123 (10)                 | 100 (8)       | 101 (8)       | 42 (3)        | 48 (4)        | 37 (3)        | 60 (5)        | 33 (3)        | 45 (4)        | 32 (3)        | <0.0001              |
| Radio/television                                  | 71 (6)                   | 80 (6)        | 69 (5)        | 35 (3)        | 38 (3)        | 42 (4)        | 62 (5)        | 34 (3)        | 38 (4)        | 27 (3)        | <0.0001              |
| Health food stores                                | 119 (10)                 | 121 (9)       | 108 (9)       | 67 (5)        | 69 (6)        | 64 (5)        | 73 (6)        | 57 (5)        | 68 (6)        | 57 (5)        | <0.0001              |
| Telephone services (call centres)                 | -                        | 4 (<1)        | 5 (<1)        | 4 (<1)        | 7 (<1)        | 1 (<1)        | 3 (<1)        | 3 (<1)        | 3 (<1)        | 4 (<1)        | 0.728                |
| MI received from at least one source <sup>d</sup> | 1185 (97)                | 1181 (92)     | 1125 (89)     | 1023 (77)     | 928 (75)      | 899 (76)      | 894 (79)      | 802 (73)      | 832 (78)      | 801 (75)      | <0.0001              |
| Male                                              | 727 (37)                 | 722 (36)      | 780 (38)      | 769 (37)      | 722 (37)      | 690 (37)      | 716 (39)      | 658 (37)      | 616 (37)      | 603 (36)      |                      |
| Physician                                         | 408 (56)                 | 407 (56)      | 415 (53)      | 387 (50)      | 334 (46)      | 357 (52)      | 355 (50)      | 310 (47)      | 279 (45)      | 274 (45)      | <0.0001              |
| Community pharmacist                              | 275 (37)                 | 296 (41)      | 310 (40)      | 266 (35)      | 264 (37)      | 279 (40)      | 264 (37)      | 237 (36)      | 239 (39)      | 254 (42)      | 0.005                |
| Package leaflet                                   | -                        | 261 (36)      | 243 (31)      | 218 (28)      | 191 (26)      | 158 (23)      | 179 (25)      | 161 (24)      | 143 (23)      | 158 (26)      | <0.0001              |
| Nurse                                             | 87 (12)                  | 124 (17)      | 95 (12)       | 102 (13)      | 84 (12)       | 86 (12)       | 100 (14)      | 79 (11)       | 77 (13)       | 76 (13)       | 0.001                |
| Books/newspapers                                  | 66 (9)                   | 49 (7)        | 41 (5)        | 30 (4)        | 20 (3)        | 21 (3)        | 28 (4)        | 20 (3)        | 26 (4)        | 14 (2)        | <0.0001              |
| Relatives/friends                                 | 109 (15)                 | 70 (10)       | 63 (8)        | 35 (5)        | 47 (7)        | 41 (6)        | 34 (5)        | 38 (6)        | 35 (6)        | 35 (6)        | <0.0001              |
| Internet                                          | 7 (1)                    | 21 (3)        | 58 (7)        | 65 (8)        | 65 (9)        | 72 (10)       | 81 (11)       | 75 (11)       | 71 (12)       | 71 (12)       | <0.0001              |
| Advertisements                                    | 57 (8)                   | 35 (5)        | 36 (5)        | 24 (3)        | 9 (1)         | 14 (2)        | 9 (1)         | 17 (3)        | 15 (2)        | 9 (1)         | <0.0001              |
| Radio/television                                  | 59 (8)                   | 47 (7)        | 32 (4)        | 20 (3)        | 12 (2)        | 15 (2)        | 19 (3)        | 9 (1)         | 22 (4)        | 16 (3)        | <0.0001              |
| Health food stores                                | 22 (3)                   | 20 (3)        | 28 (4)        | 21 (3)        | 10 (1)        | 13 (2)        | 17 (2)        | 9 (1)         | 9 (1)         | 9 (1)         | 0.013                |
| Telephone services (call centres)                 | -                        | 0 (0)         | 0 (0)         | 2 (<1)        | 0 (0)         | 0 (0)         | 1 (<1)        | 0 (0)         | 0 (0)         | 1 (<1)        | 1.000                |
| MI received from at least one source <sup>d</sup> | 683 (94)                 | 623 (86)      | 637 (82)      | 548 (71)      | 476 (66)      | 493 (71)      | 499 (70)      | 434 (66)      | 401 (65)      | 403 (67)      | <0.0001              |
| <b>Age group (years)</b>                          |                          |               |               |               |               |               |               |               |               |               |                      |
| 15-24                                             | 314 (16)                 | 308 (15)      | 269 (13)      | 270 (13)      | 263 (13)      | 255 (14)      | 231 (13)      | 211 (12)      | 199 (12)      | 215 (13)      |                      |
| Physician                                         | 157 (50)                 | 154 (50)      | 122 (45)      | 102 (38)      | 96 (37)       | 96 (38)       | 93 (40)       | 88 (42)       | 80 (40)       | 89 (41)       | <0.0001              |
| Community pharmacist                              | 132 (42)                 | 126 (41)      | 93 (35)       | 87 (32)       | 86 (33)       | 88 (35)       | 77 (33)       | 84 (40)       | 76 (38)       | 84 (39)       | 0.001                |
| Package leaflet                                   | -                        | 183 (59)      | 131 (49)      | 106 (39)      | 98 (38)       | 89 (35)       | 66 (29)       | 80 (38)       | 78 (39)       | 80 (37)       | <0.0001              |
| Nurse                                             | 65 (21)                  | 73 (24)       | 48 (18)       | 54 (20)       | 55 (21)       | 51 (20)       | 44 (19)       | 48 (23)       | 41 (21)       | 43 (20)       | 0.550                |
| Books/newspapers                                  | 41 (13)                  | 45 (15)       | 26 (10)       | 10 (4)        | 20 (8)        | 8 (3)         | 18 (8)        | 17 (8)        | 6 (3)         | 8 (4)         | <0.0001              |
| Relatives/friends                                 | 110 (35)                 | 76 (25)       | 60 (22)       | 48 (18)       | 52 (20)       | 40 (16)       | 50 (22)       | 40 (19)       | 29 (15)       | 35 (16)       | <0.0001              |
| Internet                                          | 7 (2)                    | 14 (5)        | 23 (9)        | 36 (13)       | 39 (15)       | 36 (14)       | 43 (19)       | 42 (20)       | 41 (21)       | 42 (20)       | <0.0001              |
| Advertisements                                    | 31 (10)                  | 26 (8)        | 30 (11)       | 9 (3)         | 12 (5)        | 9 (4)         | 8 (3)         | 7 (3)         | 5 (3)         | 6 (3)         | <0.0001              |
| Radio/television                                  | 30 (10)                  | 24 (8)        | 21 (8)        | 7 (3)         | 14 (5)        | 7 (3)         | 11 (5)        | 8 (4)         | 4 (2)         | 3 (1)         | <0.0001              |
| Health food stores                                | 11 (4)                   | 12 (4)        | 9 (3)         | 5 (2)         | 1 (<1)        | 4 (2)         | 5 (2)         | 7 (3)         | 7 (4)         | 5 (2)         | 0.277                |
| Telephone services (call centres)                 | -                        | 3 (1)         | 0 (0)         | 0 (0)         | 1 (<1)        | 0 (0)         | 0 (0)         | 0 (0)         | 1 (1)         | 1 (<1)        | 0.995                |
| MI received from at least one source <sup>d</sup> | 298 (95)                 | 271 (88)      | 223 (83)      | 185 (69)      | 169 (64)      | 166 (65)      | 158 (68)      | 136 (64)      | 127 (64)      | 146 (68)      | <0.0001              |

|                                                   |          |          |          |          |          |          |          |          |          |          |         |
|---------------------------------------------------|----------|----------|----------|----------|----------|----------|----------|----------|----------|----------|---------|
| 25-34                                             | 331 (17) | 308 (15) | 302 (15) | 305 (15) | 287 (15) | 258 (14) | 277 (15) | 251 (14) | 240 (14) | 239 (14) |         |
| Physician                                         | 176 (53) | 152 (46) | 139 (46) | 144 (47) | 136 (48) | 119 (46) | 127 (46) | 108 (43) | 116 (48) | 88 (37)  | <0.0001 |
| Community pharmacist                              | 183 (55) | 141 (43) | 137 (45) | 140 (46) | 122 (43) | 126 (49) | 136 (49) | 116 (46) | 115 (48) | 117 (49) | 0.011   |
| Package leaflet                                   | -        | 160 (48) | 132 (44) | 129 (42) | 119 (42) | 100 (39) | 107 (39) | 101 (40) | 89 (37)  | 87 (36)  | <0.0001 |
| Nurse                                             | 59 (17)  | 48 (15)  | 41 (14)  | 42 (14)  | 40 (14)  | 32 (12)  | 36 (13)  | 32 (13)  | 42 (18)  | 30 (13)  | 0.350   |
| Books/newspapers                                  | 47 (14)  | 34 (10)  | 29 (10)  | 14 (5)   | 12 (4)   | 10 (4)   | 12 (4)   | 11 (4)   | 9 (4)    | 13 (5)   | <0.0001 |
| Relatives/friends                                 | 57 (17)  | 38 (11)  | 51 (17)  | 23 (8)   | 28 (10)  | 25 (10)  | 38 (14)  | 17 (7)   | 33 (14)  | 19 (8)   | <0.0001 |
| Internet                                          | 5 (2)    | 20 (6)   | 31 (10)  | 45 (15)  | 52 (18)  | 49 (19)  | 56 (20)  | 48 (19)  | 60 (25)  | 49 (21)  | <0.0001 |
| Advertisements                                    | 31 (9)   | 29 (9)   | 28 (9)   | 8 (3)    | 8 (3)    | 9 (3)    | 7 (3)    | 6 (2)    | 6 (3)    | 5 (2)    | <0.0001 |
| Radio/television                                  | 31 (9)   | 23 (7)   | 23 (8)   | 4 (1)    | 9 (3)    | 8 (3)    | 5 (2)    | 5 (2)    | 3 (1)    | 6 (3)    | <0.0001 |
| Health food stores                                | 16 (5)   | 16 (5)   | 28 (9)   | 12 (4)   | 13 (5)   | 6 (2)    | 10 (4)   | 9 (4)    | 13 (5)   | 8 (3)    | 0.009   |
| Telephone services (call centres)                 | -        | 0 (0)    | 3 (1)    | 1 (<1)   | 1 (<1)   | 0 (0)    | 1 (<1)   | 2 (1)    | 1 (<1)   | 4 (2)    | 0.795   |
| MI received from at least one source <sup>d</sup> | 316 (95) | 273 (89) | 248 (82) | 220 (72) | 192 (67) | 184 (71) | 191 (69) | 167 (67) | 173 (72) | 161 (67) | <0.0001 |
| 35-44                                             | 419 (22) | 411 (21) | 394 (19) | 376 (19) | 335 (17) | 304 (16) | 318 (17) | 292 (17) | 275 (16) | 285 (17) |         |
| Physician                                         | 220 (55) | 221 (54) | 200 (51) | 164 (44) | 146 (44) | 145 (48) | 145 (46) | 127 (43) | 121 (44) | 120 (42) | <0.0001 |
| Community pharmacist                              | 230 (55) | 213 (52) | 183 (47) | 165 (44) | 132 (39) | 141 (47) | 130 (41) | 119 (41) | 134 (49) | 121 (43) | <0.0001 |
| Package leaflet                                   | -        | 182 (44) | 181 (46) | 141 (38) | 122 (37) | 96 (32)  | 112 (35) | 105 (36) | 105 (38) | 86 (30)  | <0.0001 |
| Nurse                                             | 40 (10)  | 46 (11)  | 41 (10)  | 46 (12)  | 44 (13)  | 29 (10)  | 34 (11)  | 37 (13)  | 26 (9)   | 37 (13)  | 0.861   |
| Books/newspapers                                  | 77 (18)  | 57 (14)  | 33 (8)   | 24 (6)   | 16 (5)   | 12 (4)   | 19 (6)   | 10 (3)   | 14 (5)   | 12 (4)   | <0.0001 |
| Relatives/friends                                 | 37 (9)   | 35 (9)   | 24 (6)   | 29 (8)   | 25 (7)   | 21 (7)   | 15 (5)   | 21 (7)   | 16 (6)   | 16 (6)   | 0.294   |
| Internet                                          | 9 (2)    | 17 (4)   | 43 (11)  | 54 (14)  | 44 (13)  | 45 (15)  | 42 (13)  | 37 (13)  | 54 (20)  | 36 (13)  | <0.0001 |
| Advertisements                                    | 61 (15)  | 33 (8)   | 26 (7)   | 18 (5)   | 6 (2)    | 7 (2)    | 9 (3)    | 9 (3)    | 7 (3)    | 14 (5)   | <0.0001 |
| Radio/television                                  | 34 (8)   | 31 (8)   | 13 (3)   | 11 (3)   | 3 (1)    | 7 (2)    | 12 (4)   | 6 (2)    | 9 (3)    | 8 (3)    | <0.0001 |
| Health food stores                                | 41 (10)  | 39 (9)   | 25 (6)   | 19 (5)   | 10 (3)   | 15 (5)   | 13 (4)   | 13 (4)   | 12 (4)   | 9 (3)    | <0.0001 |
| Telephone services (call centres)                 | -        | 1 (<1)   | 0 (0)    | 3 (1)    | 2 (1)    | 0 (0)    | 2 (<1)   | 1 (<1)   | 0 (0)    | 0 (0)    | 0.992   |
| MI received from at least one source <sup>d</sup> | 400 (95) | 366 (89) | 334 (85) | 270 (72) | 232 (69) | 210 (69) | 219 (69) | 195 (67) | 190 (69) | 188 (66) | <0.0001 |
| 45-54                                             | 481 (25) | 486 (24) | 491 (24) | 490 (23) | 460 (24) | 484 (26) | 438 (24) | 430 (24) | 411 (25) | 387 (23) |         |
| Physician                                         | 342 (71) | 314 (65) | 297 (60) | 275 (56) | 232 (50) | 237 (49) | 229 (52) | 210 (49) | 200 (49) | 203 (52) | <0.0001 |
| Community pharmacist                              | 210 (44) | 218 (45) | 227 (46) | 201 (41) | 203 (44) | 231 (48) | 216 (49) | 196 (46) | 196 (48) | 187 (48) | 0.240   |
| Package leaflet                                   | -        | 185 (38) | 181 (37) | 176 (36) | 169 (37) | 163 (34) | 160 (37) | 136 (32) | 145 (35) | 138 (36) | 0.281   |
| Nurse                                             | 59 (12)  | 65 (13)  | 53 (11)  | 72 (15)  | 47 (10)  | 46 (10)  | 59 (13)  | 48 (11)  | 53 (13)  | 42 (11)  | 0.212   |
| Books/newspapers                                  | 81 (17)  | 60 (12)  | 57 (12)  | 40 (8)   | 32 (7)   | 32 (5)   | 38 (9)   | 20 (5)   | 33 (8)   | 17 (4)   | <0.0001 |
| Relatives/friends                                 | 37 (8)   | 31 (6)   | 21 (4)   | 18 (4)   | 31 (7)   | 24 (5)   | 18 (4)   | 20 (5)   | 21 (5)   | 15 (4)   | 0.018   |
| Internet                                          | 3 (1)    | 12 (2)   | 38 (8)   | 61 (12)  | 58 (13)  | 63 (13)  | 68 (16)  | 58 (13)  | 60 (15)  | 60 (16)  | <0.0001 |
| Advertisements                                    | 32 (7)   | 31 (6)   | 30 (6)   | 17 (3)   | 16 (3)   | 15 (3)   | 20 (5)   | 14 (3)   | 18 (4)   | 6 (2)    | 0.004   |
| Radio/television                                  | 22 (5)   | 26 (5)   | 15 (3)   | 17 (3)   | 13 (3)   | 10 (2)   | 17 (4)   | 10 (2)   | 20 (5)   | 6 (2)    | 0.019   |
| Health food stores                                | 43 (9)   | 38 (8)   | 29 (6)   | 10 (2)   | 28 (6)   | 22 (5)   | 32 (7)   | 13 (3)   | 20 (5)   | 16 (4)   | 0.001   |
| Telephone services (call centres)                 | -        | 0 (0)    | 0 (0)    | 1 (<1)   | 2 (<1)   | 1 (<1)   | 0 (0)    | 0 (0)    | 1 (<1)   | 0 (0)    | 1.000   |
| MI received from at least one source <sup>d</sup> | 466 (97) | 446 (92) | 435 (89) | 383 (78) | 353 (77) | 364 (75) | 353 (81) | 305 (71) | 307 (75) | 287 (74) | <0.0001 |
| 55-64                                             | 399 (21) | 487 (24) | 582 (29) | 660 (31) | 612 (31) | 570 (30) | 580 (31) | 575 (33) | 552 (33) | 545 (33) |         |
| Physician                                         | 311 (78) | 345 (71) | 395 (68) | 365 (55) | 340 (56) | 356 (62) | 339 (58) | 306 (53) | 299 (54) | 285 (52) | <0.0001 |
| Community pharmacist                              | 137 (34) | 214 (44) | 261 (45) | 268 (41) | 269 (44) | 256 (45) | 266 (46) | 245 (43) | 272 (49) | 250 (46) | 0.025   |
| Package leaflet                                   | -        | 166 (34) | 157 (27) | 193 (29) | 177 (29) | 172 (30) | 173 (30) | 150 (26) | 163 (30) | 175 (32) | 0.009   |
| Nurse                                             | 51 (13)  | 75 (15)  | 71 (12)  | 83 (13)  | 71 (12)  | 85 (15)  | 85 (15)  | 82 (14)  | 70 (13)  | 76 (14)  | 0.128   |
| Books/newspapers                                  | 46 (12)  | 51 (10)  | 58 (10)  | 37 (6)   | 32 (5)   | 42 (7)   | 50 (9)   | 36 (6)   | 49 (9)   | 41 (8)   | <0.0001 |
| Relatives/friends                                 | 28 (7)   | 33 (7)   | 28 (5)   | 9 (1)    | 24 (4)   | 20 (4)   | 24 (4)   | 22 (4)   | 26 (5)   | 27 (5)   | <0.0001 |
| Internet                                          | 2 (1)    | 5 (1)    | 22 (4)   | 47 (7)   | 50 (8)   | 68 (12)  | 67 (12)  | 82 (14)  | 68 (12)  | 75 (14)  | <0.0001 |
| Advertisements                                    | 25 (6)   | 16 (3)   | 23 (4)   | 14 (7)   | 15 (2)   | 12 (2)   | 27 (5)   | 14 (2)   | 24 (4)   | 10 (2)   | 0.001   |
| Radio/television                                  | 13 (3)   | 23 (5)   | 29 (5)   | 16 (2)   | 11 (2)   | 25 (4)   | 36 (6)   | 14 (2)   | 24 (4)   | 20 (4)   | 0.004   |
| Health food stores                                | 30 (8)   | 36 (7)   | 45 (8)   | 42 (6)   | 27 (4)   | 30 (5)   | 42 (6)   | 24 (4)   | 25 (5)   | 28 (5)   | 0.027   |
| Telephone services (call centres)                 | -        | 0 (0)    | 2 (<1)   | 1 (<1)   | 1 (1)    | 0 (0)    | 1 (<1)   | 0 (0)    | 0 (0)    | 0 (0)    | 1.000   |
| MI received from at least one source <sup>d</sup> | 387 (97) | 448 (92) | 522 (90) | 513 (78) | 458 (75) | 468 (82) | 472 (81) | 433 (75) | 436 (79) | 422 (77) | <0.0001 |

<sup>a</sup>Discrepancies in totals are due to rounding errors, <sup>b</sup>Calculated from study years available, <sup>c</sup>Statistical significance for the change in the receipt of medicines information between the study years. Age, educational level, number of medicines in use and number of diagnosed diseases adjusted logistic regression was used in gender stratified analysis; and gender, educational level, number of medicines in use and number of diagnosed diseases adjusted logistic regression in age group stratified analysis,

<sup>d</sup>Medicines information (MI) sources listed in the survey.

**Appendix B.** Trends in the receipt of medicines information among medicine users by number of medicines in use and number of diagnosed diseases. The percentages are calculated from the variables within each subcategory (i.e. number of medicines in use, number of diagnosed diseases)<sup>a</sup>.

| Characteristics                                   | Study years <sup>b</sup> |               |               |               |               |               |               |               |               |               | P-value <sup>c</sup> |
|---------------------------------------------------|--------------------------|---------------|---------------|---------------|---------------|---------------|---------------|---------------|---------------|---------------|----------------------|
|                                                   | 1999<br>n (%)            | 2002<br>n (%) | 2005<br>n (%) | 2008<br>n (%) | 2009<br>n (%) | 2010<br>n (%) | 2011<br>n (%) | 2012<br>n (%) | 2013<br>n (%) | 2014<br>n (%) |                      |
| Respondents using medicines                       | 1944                     | 2000          | 2038          | 2101          | 1957          | 1871          | 1844          | 1759          | 1677          | 1671          |                      |
| Number of medicines in use/person                 |                          |               |               |               |               |               |               |               |               |               |                      |
| 1 medicine                                        | 1215 (63)                | 1183 (59)     | 1143 (56)     | 1154 (55)     | 1060 (54)     | 1029 (55)     | 1011 (55)     | 946 (54)      | 907 (54)      | 910 (54)      |                      |
| Physician                                         | 628 (52)                 | 559 (47)      | 508 (44)      | 465 (40)      | 410 (39)      | 414 (40)      | 410 (41)      | 344 (36)      | 366 (40)      | 345 (38)      | <0.0001              |
| Community pharmacist                              | 540 (44)                 | 461 (39)      | 408 (36)      | 405 (35)      | 369 (35)      | 386 (38)      | 375 (37)      | 333 (35)      | 368 (41)      | 347 (38)      | <0.0001              |
| Package leaflet                                   | -                        | 478 (40)      | 401 (35)      | 354 (31)      | 317 (30)      | 293 (28)      | 312 (31)      | 261 (28)      | 278 (31)      | 258 (28)      | <0.0001              |
| Nurse                                             | 138 (11)                 | 124 (10)      | 104 (9)       | 129 (11)      | 103 (10)      | 84 (8)        | 104 (10)      | 90 (10)       | 92 (10)       | 88 (10)       | 0.114                |
| Books/newspapers                                  | 184 (15)                 | 124 (10)      | 92 (8)        | 48 (4)        | 43 (4)        | 43 (4)        | 62 (6)        | 39 (4)        | 45 (5)        | 39 (4)        | <0.0001              |
| Relatives/friends                                 | 168 (14)                 | 113 (10)      | 94 (8)        | 70 (6)        | 76 (7)        | 64 (6)        | 78 (8)        | 55 (6)        | 56 (6)        | 48 (5)        | <0.0001              |
| Internet                                          | 10 (1)                   | 37 (3)        | 78 (7)        | 99 (9)        | 90 (8)        | 114 (11)      | 120 (12)      | 105 (11)      | 117 (13)      | 117 (13)      | <0.0001              |
| Advertisements                                    | 127 (10)                 | 86 (7)        | 74 (6)        | 38 (3)        | 28 (3)        | 29 (3)        | 36 (4)        | 26 (3)        | 27 (3)        | 26 (3)        | <0.0001              |
| Radio/television                                  | 88 (7)                   | 67 (6)        | 48 (4)        | 26 (2)        | 20 (2)        | 30 (3)        | 37 (4)        | 16 (2)        | 27 (3)        | 14 (2)        | <0.0001              |
| Health food stores                                | 77 (6)                   | 71 (6)        | 60 (5)        | 36 (3)        | 41 (4)        | 44 (4)        | 46 (5)        | 28 (3)        | 39 (4)        | 35 (4)        | <0.0001              |
| Telephone services (call centres)                 | -                        | 4 (<1)        | 2 (<1)        | 3 (<1)        | 3 (<1)        | 1 (<1)        | 2 (<1)        | 2 (<1)        | 0 (0)         | 3 (<1)        | 0.985                |
| MI received from at least one source <sup>d</sup> | 1147 (94)                | 1019 (86)     | 924 (81)      | 768 (67)      | 681 (64)      | 691 (67)      | 689 (68)      | 583 (62)      | 615 (68)      | 590 (65)      | <0.0001              |
| 2 medicines                                       | 505 (26)                 | 559 (28)      | 566 (28)      | 584 (28)      | 536 (27)      | 512 (27)      | 491 (27)      | 492 (28)      | 442 (26)      | 429 (26)      |                      |
| Physician                                         | 386 (76)                 | 396 (71)      | 371 (66)      | 336 (58)      | 297 (55)      | 299 (58)      | 278 (57)      | 284 (58)      | 236 (53)      | 224 (52)      | <0.0001              |
| Community pharmacist                              | 237 (47)                 | 299 (53)      | 290 (51)      | 256 (44)      | 235 (44)      | 247 (48)      | 245 (50)      | 238 (48)      | 224 (51)      | 211 (49)      | 0.012                |
| Package leaflet                                   | -                        | 270 (48)      | 225 (40)      | 231 (40)      | 205 (38)      | 189 (37)      | 168 (34)      | 172 (35)      | 158 (36)      | 151 (35)      | <0.0001              |
| Nurse                                             | 94 (19)                  | 117 (21)      | 84 (15)       | 90 (15)       | 72 (13)       | 68 (13)       | 72 (15)       | 76 (15)       | 59 (13)       | 62 (14)       | 0.002                |
| Books/newspapers                                  | 73 (14)                  | 83 (15)       | 62 (11)       | 39 (7)        | 38 (7)        | 31 (6)        | 35 (7)        | 30 (6)        | 45 (5)        | 32 (7)        | <0.0001              |
| Relatives/friends                                 | 75 (15)                  | 66 (12)       | 62 (11)       | 38 (7)        | 54 (10)       | 45 (9)        | 42 (9)        | 39 (8)        | 38 (9)        | 29 (7)        | <0.0001              |
| Internet                                          | 7 (1)                    | 25 (4)        | 46 (8)        | 85 (15)       | 81 (15)       | 81 (16)       | 83 (17)       | 90 (18)       | 90 (20)       | 83 (19)       | <0.0001              |
| Advertisements                                    | 40 (8)                   | 34 (6)        | 43 (8)        | 17 (3)        | 17 (3)        | 14 (3)        | 16 (3)        | 14 (3)        | 19 (4)        | 10 (2)        | <0.0001              |
| Radio/television                                  | 23 (5)                   | 37 (7)        | 28 (5)        | 16 (3)        | 17 (3)        | 16 (3)        | 21 (4)        | 16 (3)        | 16 (4)        | 11 (3)        | 0.029                |
| Health food stores                                | 38 (8)                   | 48 (9)        | 51 (9)        | 31 (5)        | 18 (3)        | 22 (4)        | 27 (5)        | 23 (5)        | 22 (5)        | 17 (4)        | 0.001                |
| Telephone services (call centres)                 | -                        | 0 (0)         | 1 (<1)        | 2 (<1)        | 2 (<1)        | 0 (0)         | 1 (<1)        | 1 (<1)        | 2 (<1)        | 1 (<1)        | 0.954                |
| MI received from at least one source <sup>d</sup> | 500 (99)                 | 534 (96)      | 519 (92)      | 479 (82)      | 414 (77)      | 411 (80)      | 408 (83)      | 381 (77)      | 343 (78)      | 326 (76)      | <0.0001              |
| 3 medicines                                       | 161 (8)                  | 166 (8)       | 198 (10)      | 221 (11)      | 220 (11)      | 210 (11)      | 210 (11)      | 191 (11)      | 208 (12)      | 199 (12)      |                      |
| Physician                                         | 133 (83)                 | 139 (84)      | 158 (80)      | 147 (67)      | 140 (64)      | 149 (71)      | 150 (71)      | 116 (61)      | 134 (64)      | 122 (61)      | <0.0001              |
| Community pharmacist                              | 76 (47)                  | 94 (57)       | 112 (57)      | 111 (50)      | 118 (54)      | 130 (62)      | 110 (52)      | 106 (55)      | 127 (61)      | 117 (59)      | 0.302                |
| Package leaflet                                   | -                        | 83 (50)       | 88 (44)       | 97 (44)       | 90 (41)       | 87 (41)       | 80 (38)       | 77 (40)       | 100 (48)      | 95 (48)       | 0.152                |
| Nurse                                             | 28 (17)                  | 41 (25)       | 33 (17)       | 37 (17)       | 45 (20)       | 57 (27)       | 44 (21)       | 40 (21)       | 42 (20)       | 46 (23)       | 0.268                |
| Books/newspapers                                  | 25 (16)                  | 22 (13)       | 24 (12)       | 20 (9)        | 13 (6)        | 20 (10)       | 21 (10)       | 17 (9)        | 23 (11)       | 12 (6)        | 0.025                |
| Relatives/friends                                 | 14 (9)                   | 26 (16)       | 15 (8)        | 10 (5)        | 10 (5)        | 16 (8)        | 14 (7)        | 20 (10)       | 19 (9)        | 21 (11)       | 0.010                |
| Internet                                          | 6 (4)                    | 4 (2)         | 23 (12)       | 37 (17)       | 37 (17)       | 42 (20)       | 44 (21)       | 38 (20)       | 47 (23)       | 33 (17)       | <0.0001              |
| Advertisements                                    | 8 (5)                    | 13 (8)        | 12 (6)        | 5 (2)         | 5 (2)         | 6 (3)         | 11 (5)        | 6 (3)         | 3 (2)         | 9 (4)         | 0.094                |
| Radio/television                                  | 13 (8)                   | 17 (10)       | 9 (5)         | 5 (2)         | 5 (2)         | 9 (4)         | 13 (6)        | 5 (3)         | 11 (5)        | 6 (3)         | 0.003                |
| Health food stores                                | 19 (12)                  | 11 (7)        | 12 (6)        | 8 (4)         | 12 (5)        | 7 (3)         | 8 (4)         | 7 (4)         | 10 (5)        | 9 (5)         | 0.099                |
| Telephone services (call centres)                 | -                        | 0 (0)         | 1 (1)         | 1 (<1)        | 0 (0)         | 0 (0)         | 1 (<1)        | 0 (0)         | 1 (<1)        | 0 (0)         | 1.000                |
| MI received from at least one source <sup>d</sup> | 157 (98)                 | 162 (98)      | 189 (95)      | 193 (87)      | 181 (82)      | 184 (88)      | 177 (84)      | 157 (82)      | 172 (83)      | 174 (87)      | <0.0001              |
| 4 medicines or more                               | 63 (3)                   | 92 (5)        | 131 (6)       | 142 (7)       | 141 (7)       | 120 (6)       | 132 (7)       | 130 (7)       | 120 (7)       | 133 (8)       |                      |
| Physician                                         | 59 (94)                  | 78 (85)       | 116 (89)      | 102 (72)      | 103 (73)      | 91 (76)       | 95 (72)       | 95 (72)       | 80 (67)       | 94 (71)       | <0.0001              |
| Community pharmacist                              | 39 (62)                  | 58 (63)       | 91 (69)       | 89 (63)       | 90 (64)       | 79 (66)       | 95 (72)       | 83 (63)       | 74 (62)       | 84 (63)       | 0.842                |
| Package leaflet                                   | -                        | 45 (39)       | 68 (52)       | 63 (44)       | 73 (52)       | 51 (43)       | 58 (44)       | 62 (48)       | 44 (37)       | 62 (47)       | 0.397                |
| Nurse                                             | 14 (22)                  | 25 (27)       | 33 (25)       | 41 (29)       | 37 (26)       | 34 (28)       | 38 (29)       | 41 (32)       | 39 (33)       | 32 (24)       | 0.737                |
| Books/newspapers                                  | 10 (16)                  | 18 (20)       | 25 (19)       | 18 (13)       | 18 (13)       | 10 (8)        | 19 (14)       | 8 (6)         | 14 (12)       | 8 (6)         | 0.031                |
| Relatives/friends                                 | 12 (19)                  | 8 (9)         | 13 (10)       | 9 (6)         | 20 (14)       | 5 (4)         | 11 (8)        | 6 (5)         | 12 (10)       | 14 (11)       | 0.097                |
| Internet                                          | 3 (5)                    | 2 (2)         | 10 (8)        | 22 (15)       | 35 (25)       | 24 (20)       | 29 (22)       | 34 (26)       | 29 (24)       | 29 (22)       | <0.0001              |
| Advertisements                                    | 5 (8)                    | 2 (2)         | 8 (6)         | 6 (4)         | 7 (5)         | 2 (2)         | 7 (5)         | 4 (3)         | 5 (4)         | 2 (2)         | 0.357                |
| Radio/television                                  | 6 (10)                   | 6 (7)         | 16 (12)       | 8 (6)         | 8 (6)         | 2 (2)         | 10 (8)        | 6 (5)         | 6 (5)         | 12 (9)        | 0.218                |
| Health food stores                                | 7 (11)                   | 11 (12)       | 13 (10)       | 13 (9)        | 8 (6)         | 4 (3)         | 9 (7)         | 8 (6)         | 6 (5)         | 5 (4)         | 0.125                |

|                                                        |           |           |          |          |          |          |          |          |           |          |         |
|--------------------------------------------------------|-----------|-----------|----------|----------|----------|----------|----------|----------|-----------|----------|---------|
| Telephone services (call centres)                      | -         | 0 (0)     | 1 (1)    | 0 (0)    | 2 (1)    | 0 (0)    | 0 (0)    | 0 (0)    | 0 (0)     | 1 (1)    | 1.000   |
| MI received from at least one source <sup>d</sup>      | 63 (100)  | 89 (97)   | 130 (99) | 131 (92) | 128 (91) | 106 (88) | 119 (90) | 115 (88) | 103 (86)  | 114 (86) | 0.074   |
| <b>Number of diagnosed diseases/person<sup>e</sup></b> |           |           |          |          |          |          |          |          |           |          |         |
| None                                                   | 1228 (63) | 1121 (56) | 971 (48) | 850 (40) | 772 (39) | 796 (43) | 746 (40) | 705 (40) | 721 (42)  | 689 (41) |         |
| Physician                                              | 633 (52)  | 536 (48)  | 384 (40) | 281 (33) | 266 (34) | 295 (37) | 268 (36) | 247 (35) | 264 (37)  | 217 (31) | <0.0001 |
| Community pharmacist                                   | 558 (45)  | 470 (42)  | 371 (38) | 294 (35) | 252 (33) | 289 (36) | 264 (35) | 247 (35) | 272 (38)  | 236 (34) | <0.0001 |
| Package leaflet                                        | -         | 496 (44)  | 387 (40) | 275 (32) | 246 (32) | 239 (30) | 233 (31) | 199 (28) | 226 (32)  | 207 (30) | <0.0001 |
| Nurse                                                  | 157 (13)  | 146 (13)  | 91 (9)   | 87 (10)  | 64 (8)   | 76 (10)  | 69 (9)   | 69 (10)  | 72 (10)   | 64 (9)   | 0.030   |
| Books/newspapers                                       | 194 (16)  | 134 (12)  | 95 (10)  | 41 (5)   | 34 (4)   | 39 (5)   | 49 (7)   | 34 (5)   | 38 (5)    | 37 (5)   | <0.0001 |
| Relatives/friends                                      | 196 (16)  | 135 (12)  | 117 (12) | 54 (6)   | 65 (8)   | 63 (8)   | 69 (9)   | 54 (8)   | 49 (7)    | 40 (6)   | <0.0001 |
| Internet                                               | 15 (1)    | 38 (3)    | 65 (7)   | 75 (9)   | 70 (9)   | 95 (12)  | 92 (12)  | 83 (12)  | 108 (15)  | 93 (13)  | <0.0001 |
| Advertisements                                         | 141 (12)  | 88 (8)    | 81 (8)   | 34 (4)   | 20 (3)   | 25 (3)   | 29 (4)   | 19 (3)   | 24 (3)    | 24 (3)   | <0.0001 |
| Radio/television                                       | 96 (8)    | 65 (6)    | 52 (5)   | 19 (2)   | 17 (2)   | 21 (3)   | 31 (4)   | 12 (2)   | 23 (3)    | 18 (3)   | <0.0001 |
| Health food stores                                     | 85 (7)    | 84 (8)    | 72 (7)   | 37 (4)   | 22 (3)   | 33 (4)   | 30 (4)   | 17 (2)   | 35 (5)    | 29 (4)   | <0.0001 |
| Telephone services (call centres)                      | -         | 3 (<1)    | 4 (<1)   | 2 (<1)   | 2 (<1)   | 0 (0)    | 2 (<1)   | 2 (<1)   | 2 (<1)    | 3 (<1)   | 0.963   |
| MI received from at least one source <sup>d</sup>      | 1163 (95) | 966 (86)  | 784 (81) | 543 (64) | 481 (62) | 528 (66) | 493 (66) | 424 (60) | 466 (65)  | 425 (62) | <0.0001 |
| <b>1 disease</b>                                       | 502 (26)  | 527 (26)  | 593 (29) | 605 (29) | 546 (28) | 482 (26) | 517 (28) | 499 (28) | 455 (27)  | 450 (27) |         |
| Physician                                              | 389 (77)  | 364 (69)  | 394 (66) | 337 (56) | 282 (52) | 252 (52) | 265 (51) | 240 (48) | 237 (52)  | 237 (53) | <0.0001 |
| Community pharmacist                                   | 224 (45)  | 259 (49)  | 260 (44) | 235 (39) | 223 (41) | 213 (44) | 234 (45) | 207 (41) | 221 (49)  | 212 (47) | 0.020   |
| Package leaflet                                        | -         | 228 (43)  | 202 (34) | 206 (34) | 188 (34) | 154 (32) | 160 (31) | 147 (29) | 163 (36)  | 139 (31) | <0.0001 |
| Nurse                                                  | 70 (14)   | 81 (15)   | 68 (12)  | 87 (14)  | 81 (15)  | 54 (11)  | 67 (13)  | 63 (13)  | 56 (12)   | 59 (13)  | 0.558   |
| Books/newspapers                                       | 75 (15)   | 66 (13)   | 54 (9)   | 36 (6)   | 33 (6)   | 23 (5)   | 38 (7)   | 24 (5)   | 31 (7)    | 19 (4)   | <0.0001 |
| Relatives/friends                                      | 53 (11)   | 56 (11)   | 32 (5)   | 36 (6)   | 40 (7)   | 39 (8)   | 36 (7)   | 26 (5)   | 30 (7)    | 24 (5)   | <0.0001 |
| Internet                                               | 8 (2)     | 19 (4)    | 49 (8)   | 76 (13)  | 66 (12)  | 67 (14)  | 63 (12)  | 68 (14)  | 89 (20)   | 66 (15)  | <0.0001 |
| Advertisements                                         | 32 (6)    | 30 (6)    | 35 (6)   | 11 (2)   | 16 (3)   | 12 (2)   | 16 (3)   | 12 (2)   | 19 (4)    | 11 (2)   | <0.0001 |
| Radio/television                                       | 22 (4)    | 42 (8)    | 24 (4)   | 13 (2)   | 10 (2)   | 15 (3)   | 17 (3)   | 15 (3)   | 18 (4)    | 7 (2)    | <0.0001 |
| Health food stores                                     | 44 (9)    | 36 (7)    | 30 (5)   | 16 (3)   | 25 (5)   | 18 (4)   | 26 (5)   | 23 (5)   | 19 (4)    | 19 (4)   | 0.005   |
| Telephone services (call centres)                      | -         | 0 (0)     | 0 (0)    | 2 (<1)   | 2 (<1)   | 1 (<1)   | 0 (0)    | 1 (<1)   | 1 (<1)    | 1 (<1)   | 1.000   |
| MI received from at least one source <sup>d</sup>      | 491 (98)  | 501 (95)  | 528 (89) | 467 (77) | 392 (72) | 360 (75) | 405 (78) | 351 (70) | 342 (75)  | 338 (75) | <0.0001 |
| <b>2 diseases</b>                                      | 151 (8)   | 232 (12)  | 270 (13) | 367 (17) | 358 (22) | 335 (18) | 345 (19) | 302 (17) | 279 (17)  | 285 (17) |         |
| Physician                                              | 126 (83)  | 183 (79)  | 203 (75) | 240 (65) | 214 (60) | 221 (66) | 229 (66) | 185 (61) | 160 (57)  | 163 (57) | <0.0001 |
| Community pharmacist                                   | 79 (52)   | 116 (50)  | 140 (52) | 180 (49) | 181 (51) | 176 (53) | 177 (51) | 155 (51) | 152 (54)  | 156 (55) | 0.941   |
| Package leaflet                                        | -         | 98 (42)   | 98 (36)  | 137 (37) | 135 (38) | 116 (35) | 125 (36) | 116 (38) | 99 (35)   | 108 (38) | 0.370   |
| Nurse                                                  | 34 (23)   | 43 (19)   | 39 (14)  | 52 (14)  | 55 (15)  | 50 (15)  | 59 (17)  | 51 (17)  | 53 (19)   | 36 (13)  | 0.276   |
| Books/newspapers                                       | 11 (7)    | 28 (12)   | 24 (9)   | 23 (6)   | 25 (7)   | 21 (6)   | 27 (8)   | 20 (7)   | 21 (8)    | 17 (6)   | 0.045   |
| Relatives/friends                                      | 11 (7)    | 18 (8)    | 18 (7)   | 22 (6)   | 31 (9)   | 10 (3)   | 22 (6)   | 20 (6)   | 29 (10)   | 29 (10)  | 0.044   |
| Internet                                               | 1 (1)     | 9 (4)     | 28 (10)  | 56 (15)  | 56 (16)  | 45 (13)  | 65 (19)  | 60 (20)  | 44 (16)   | 47 (16)  | <0.0001 |
| Advertisements                                         | 3 (2)     | 12 (5)    | 10 (4)   | 8 (2)    | 10 (3)   | 7 (2)    | 13 (4)   | 12 (4)   | 10 (4)    | 4 (1)    | 0.229   |
| Radio/television                                       | 7 (5)     | 11 (5)    | 7 (3)    | 8 (2)    | 11 (3)   | 9 (3)    | 19 (6)   | 12 (4)   | 11 (4)    | 7 (2)    | 0.293   |
| Health food stores                                     | 5 (3)     | 15 (7)    | 15 (6)   | 20 (5)   | 24 (7)   | 13 (4)   | 23 (7)   | 15 (5)   | 11 (4)    | 8 (3)    | 0.208   |
| Telephone services (call centres)                      | -         | 1 (<1)    | 0 (0)    | 0 (0)    | 0 (0)    | 0 (0)    | 2 (1)    | 0 (0)    | 0 (0)     | 0 (0)    | 1.000   |
| MI received from at least one source <sup>d</sup>      | 150 (99)  | 222 (96)  | 251 (93) | 311 (85) | 287 (80) | 277 (83) | 290 (84) | 250 (83) | 224 (80)  | 227 (80) | <0.0001 |
| <b>3 diseases or more</b>                              | 63 (5)    | 120 (6)   | 204 (10) | 279 (13) | 281 (14) | 258 (14) | 236 (13) | 253 (14) | 231 (14)  | 247 (15) |         |
| Physician                                              | 58 (92)   | 103 (86)  | 172 (84) | 192 (69) | 188 (67) | 185 (71) | 171 (72) | 167 (66) | 155 (67)  | 168 (68) | <0.0001 |
| Community pharmacist                                   | 31 (49)   | 67 (56)   | 130 (64) | 152 (54) | 156 (56) | 164 (64) | 150 (64) | 151 (60) | 148 (64)  | 155 (63) | 0.229   |
| Package leaflet                                        | -         | 54 (45)   | 95 (47)  | 127 (46) | 116 (41) | 111 (43) | 100 (42) | 110 (43) | 92 (40)   | 112 (45) | 0.738   |
| Nurse                                                  | 13 (21)   | 37 (31)   | 56 (28)  | 71 (25)  | 57 (20)  | 63 (24)  | 63 (27)  | 64 (25)  | 51 (22)   | 69 (28)  | 0.440   |
| Books/newspapers                                       | 12 (19)   | 19 (16)   | 30 (155) | 28 (10)  | 20 (7)   | 21 (8)   | 23 (10)  | 16 (6)   | 21 (9)    | 18 (7)   | 0.003   |
| Relatives/friends                                      | 9 (14)    | 4 (3)     | 17 (8)   | 15 (5)   | 24 (9)   | 18 (7)   | 18 (8)   | 20 (8)   | 17 (7)    | 19 (8)   | 0.307   |
| Internet                                               | 2 (3)     | 2 (2)     | 15 (7)   | 36 (13)  | 51 (18)  | 54 (21)  | 56 (24)  | 56 (22)  | 42 (18)   | 56 (23)  | <0.0001 |
| Advertisements                                         | 4 (6)     | 5 (4)     | 11 (5)   | 13 (5)   | 11 (4)   | 7 (3)    | 11 (5)   | 7 (3)    | 7 (3)     | 2 (1)    | 0.263   |
| Radio/television                                       | 5 (8)     | 9 (8)     | 18 (9)   | 15 (5)   | 12 (4)   | 12 (5)   | 14 (6)   | 4 (2)    | 7 (3)     | 11 (4)   | 0.190   |
| Health food stores                                     | 7 (11)    | 6 (5)     | 19 (9)   | 15 (5)   | 8 (3)    | 13 (5)   | 11 (5)   | 11 (4)   | 12 (5)    | 10 (4)   | 0.111   |
| Telephone services (call centres)                      | -         | 0 (0)     | 1 (1)    | 2 (1)    | 3 (1)    | 0 (0)    | 0 (0)    | 0 (0)    | 0 (0)     | 1 (<1)   | 0.998   |
| MI received from at least one source <sup>d</sup>      | 63 (100)  | 115 (96)  | 199 (98) | 250 (90) | 244 (87) | 227 (88) | 205 (87) | 211 (83) | 201 (231) | 214 (87) | 0.001   |

<sup>a</sup>Discrepancies in totals are due to rounding errors, <sup>b</sup>Calculated from study years available, <sup>c</sup>Statistical significance for the change in the receipt of medicines information between the study years. Age, gender, educational level, number of medicines in use and number of diagnosed diseases adjusted logistic regression was used in number of medicines in use and number of diagnosed diseases stratified analysis, <sup>d</sup>Medicines information (MI) sources listed in the survey, <sup>e</sup>Respondents who had diseases (list in the survey) diagnosed by a physician during the last year (12 months).
